# Supplementary material
Source: JCI journal article supplement (doi:10.1172/jci159566)
Supplement: sd1 [file 1]

## Supplementary Materials

Fig. S1. CONSORT diagram for the clinical trial

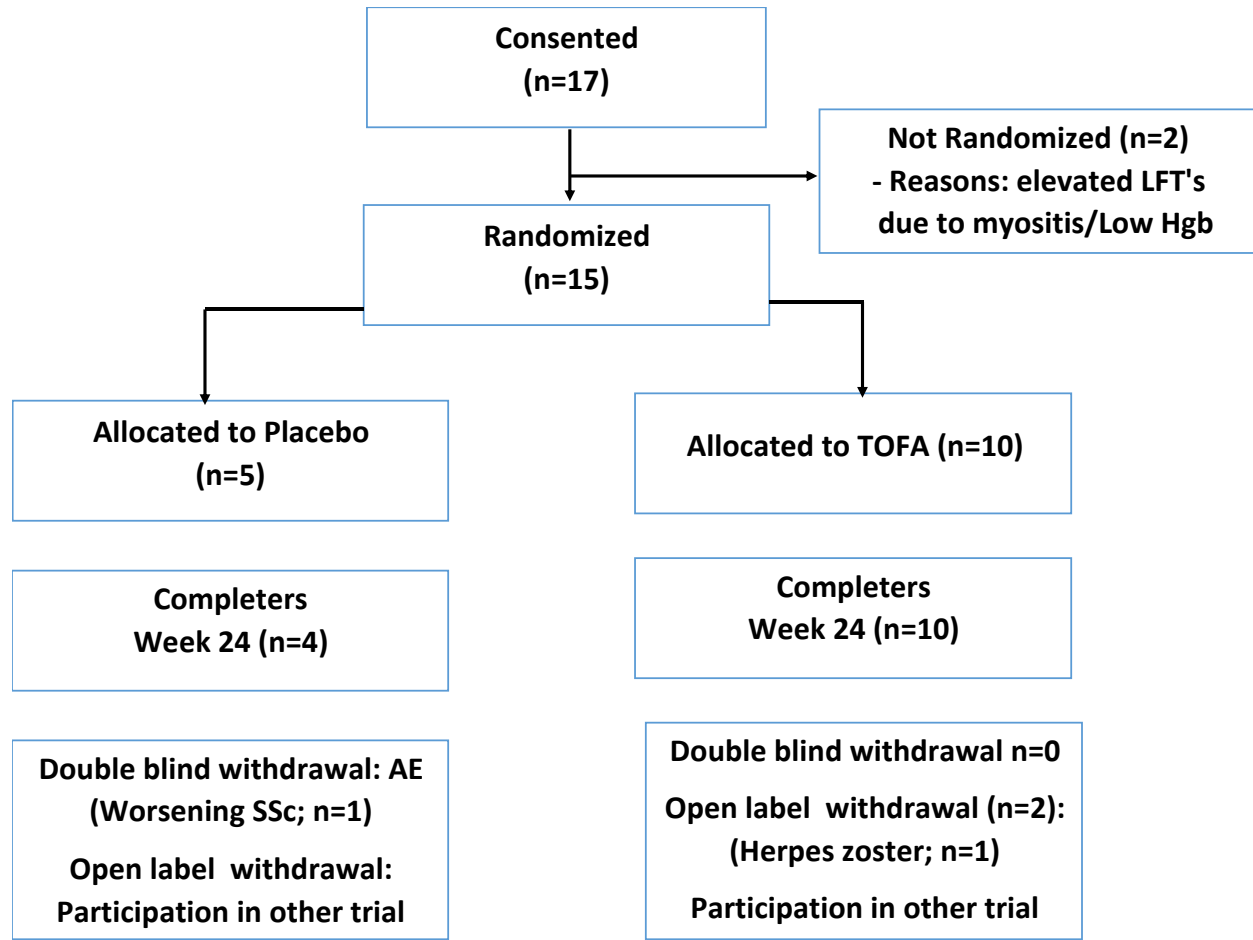

Fig. S2. Mean Trend Over Time: Change in the modified Rodnan skin score during the double blind and open label phases

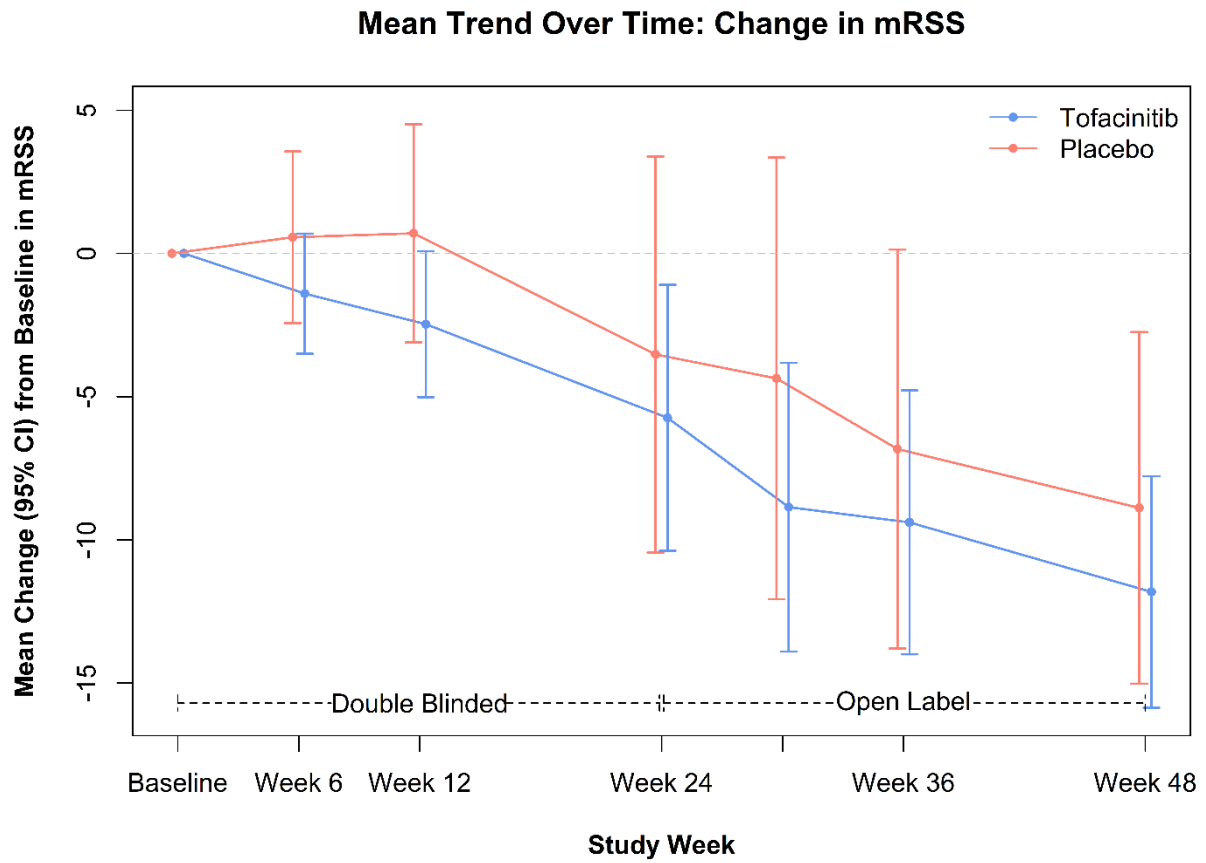

Fig. S3-T-SNE plot as in Figure 1, with cells colored by skin biopsy sample (Panel A), or by patient group (placebo patient baseline biopsies, PBO-Bsl; Placebo patient biopsies at Week 6, PBO-W6; tofacitinib treated patient baseline biopsies, TOFA-Bsl; tofacitinib treated patient Wk 6 biopsies, TOFA-W6).

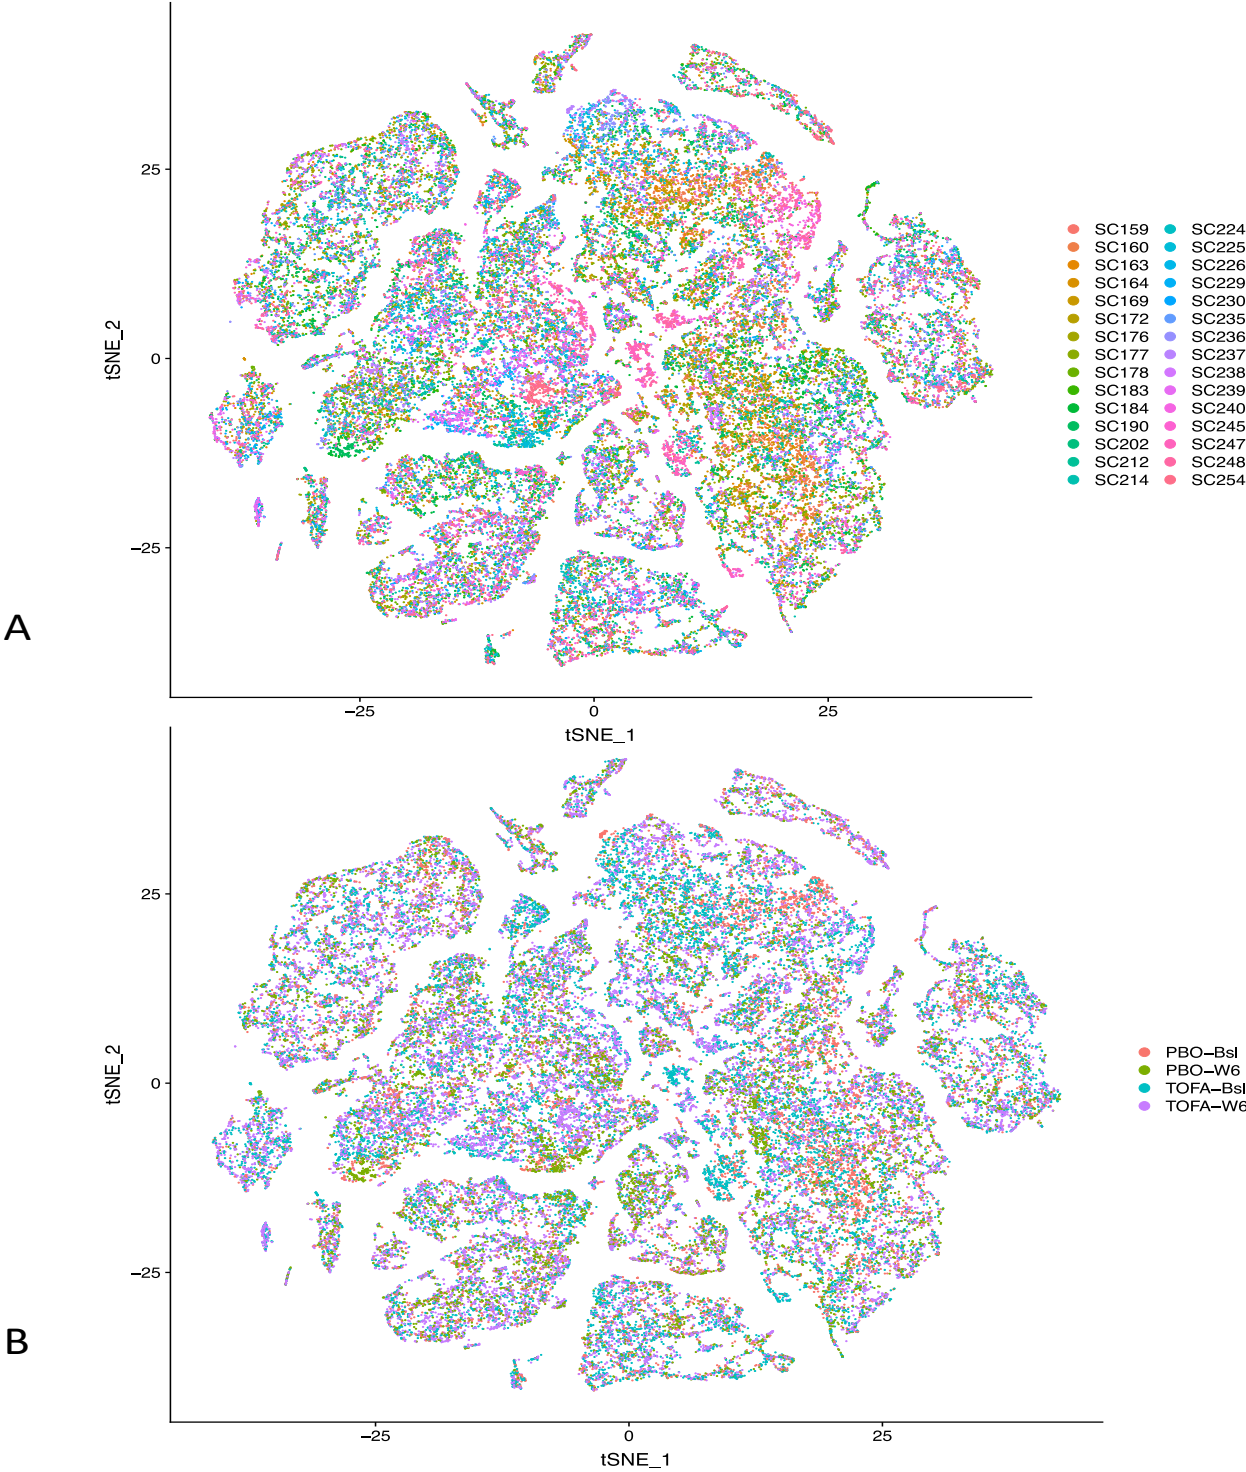

Fig. S4- Marker genes for each cell population, numbers on the x axis indicate cluster number as in Figure 1.

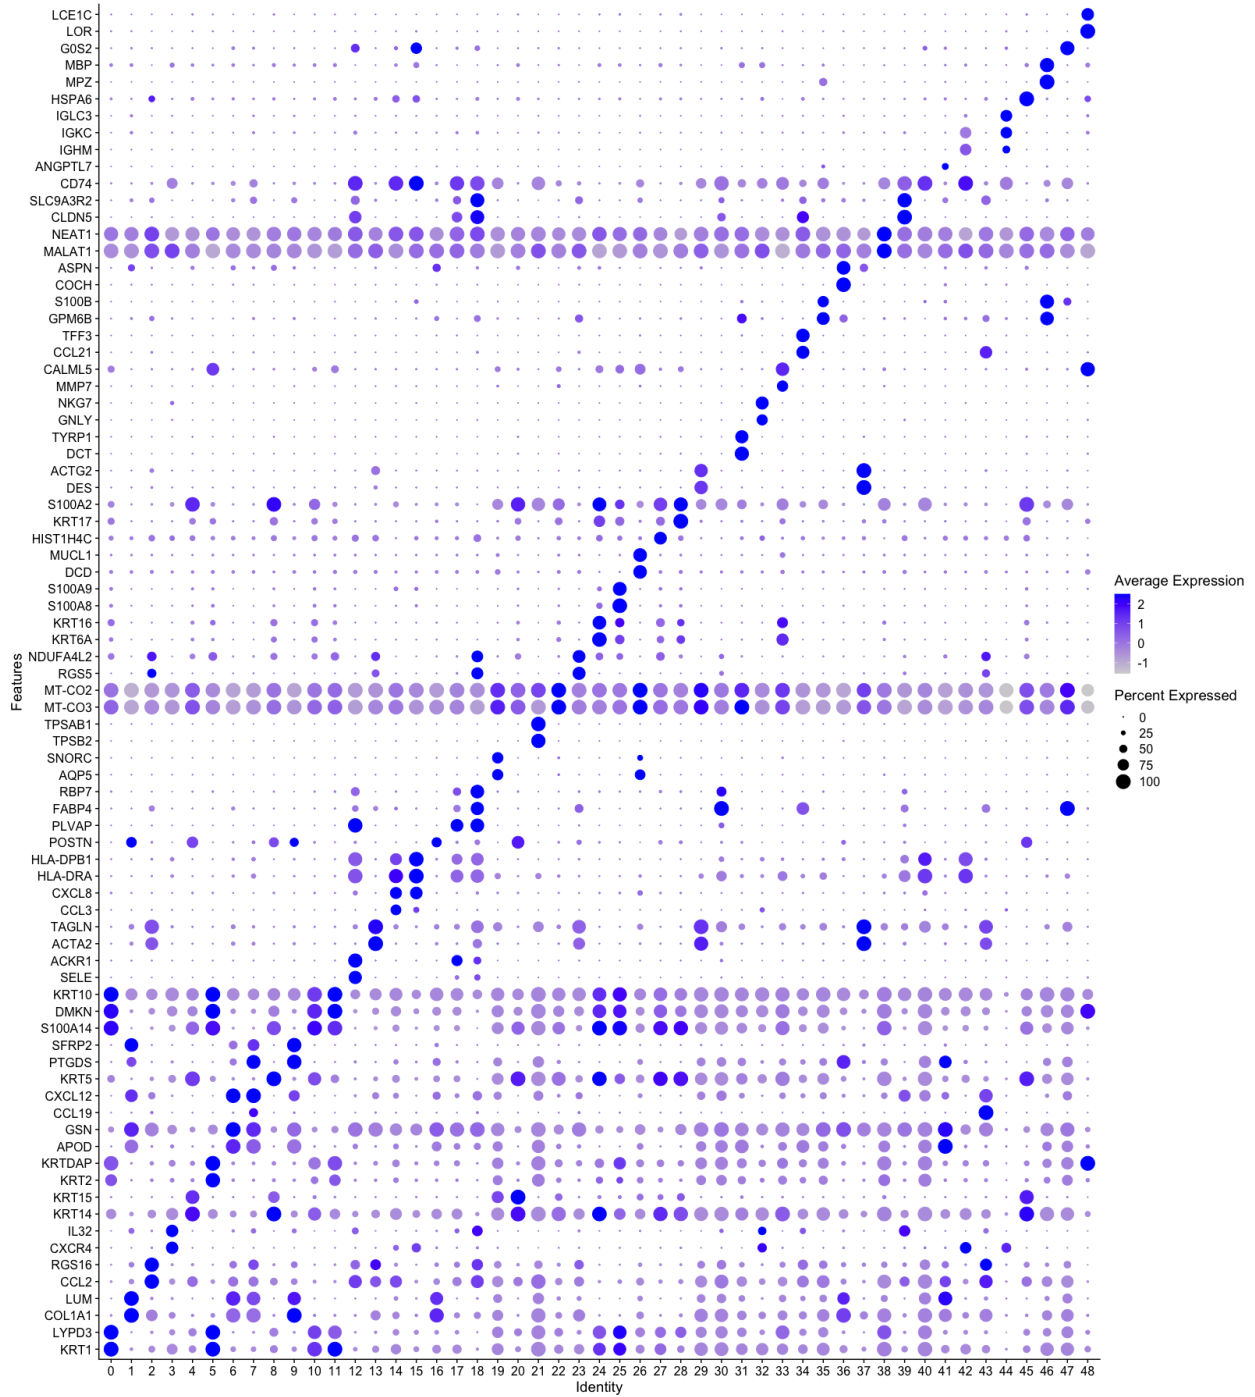

| Cluster number                  | Average number of cells/cluster |
|---------------------------------|---------------------------------|
| 0-Terminal Keratinocyte         | 103.5483871                     |
| 1-PI16 Fibroblast               | 89.16129032                     |
| 2-Pericyte                      | 87.09677419                     |
| 3-T Cell                        | 82.32258065                     |
| 4-Basal Keratinocyte            | 81.67741935                     |
| 5-Terminal Keratinocyte         | 80.83870968                     |
| 6-MYOC Fibroblast               | 77.67741935                     |
| 7-CCL19 Fibroblast              | 77.06451613                     |
| 8-Basal Keratinocyte            | 76.38709677                     |
| 9-SFRP2 Fibroblast              | 74.74193548                     |
| 10-S100A14 Keratinocyte         | 67.12903226                     |
| 11-Terminal Keratinocyte        | 61.09677419                     |
| 12-Venous Endothelial           | 56.96774194                     |
| 13-RERGL Pericyte               | 54.16129032                     |
| 14-Macrophage                   | 54.03225806                     |
| 15-Dendritic Cell               | 51.87096774                     |
| 16-DPEP1 Fibroblast             | 47.09677419                     |
| 17-Endothelial                  | 42.5483871                      |
| 18-Endothelial/Pericyte Doublet | 42.19354839                     |
| 19-CA6 Secretory                | 36.35483871                     |
| 20-KRT15 Keratinocyte           | 35.48387097                     |
| 21-Mast Cell                    | 35.29032258                     |
| 22-Dead Keratinocyte            | 30.96774194                     |
| 23-STEAP4 Pericyte              | 29.83870968                     |
| 24-KRT6A Keratinocyte           | 27.77419355                     |
| 25-S100A8 Keratinocyte          | 27.74193548                     |
| 26-SCGB1B2P Secretory           | 27.4516129                      |
| 27-Proliferating                | 23.4516129                      |
| 28-KRT17 Keratinocyte           | 22.4516129                      |
| 29-Low Quality Smooth Muscle    | 20.67741935                     |
| 30-Low Quality Endothelial      | 19.74193548                     |
| 31-Melanocyte                   | 18.96774194                     |
| 32-NK Cell                      | 18.51612903                     |
| 33-KRT6B Keratinocytes          | 18.5483871                      |
| 34-Lymphatic Endothelial        | 18.48387097                     |
| 35-Neural                       | 18.16129032                     |
| 36-Dermal Papilla               | 15.90322581                     |
| 37-Smooth Muscle                | 15.25806452                     |
| 38-Low Quality Cells            | 14.22580645                     |
| 39-Arterial Endothelial         | 11.4516129                      |
| 40-Low Quality DC               | 11.38709677                     |
| 41-ANGPTL7 Fibroblast           | 10.48387097                     |
| 42-B Cell                       | 8.064516129                     |
| 43-CCL21 Pericyte               | 6.935483871                     |
| 44-Plasma Cell                  | 6.709677419                     |
| 45-Stressed Keratinocyte        | 4.709677419                     |
| 46-Schwann                      | 3.677419355                     |
| 47-Adipocyte                    | 3.483870968                     |
| 48-Cornified Envelope           | 2.322580645                     |

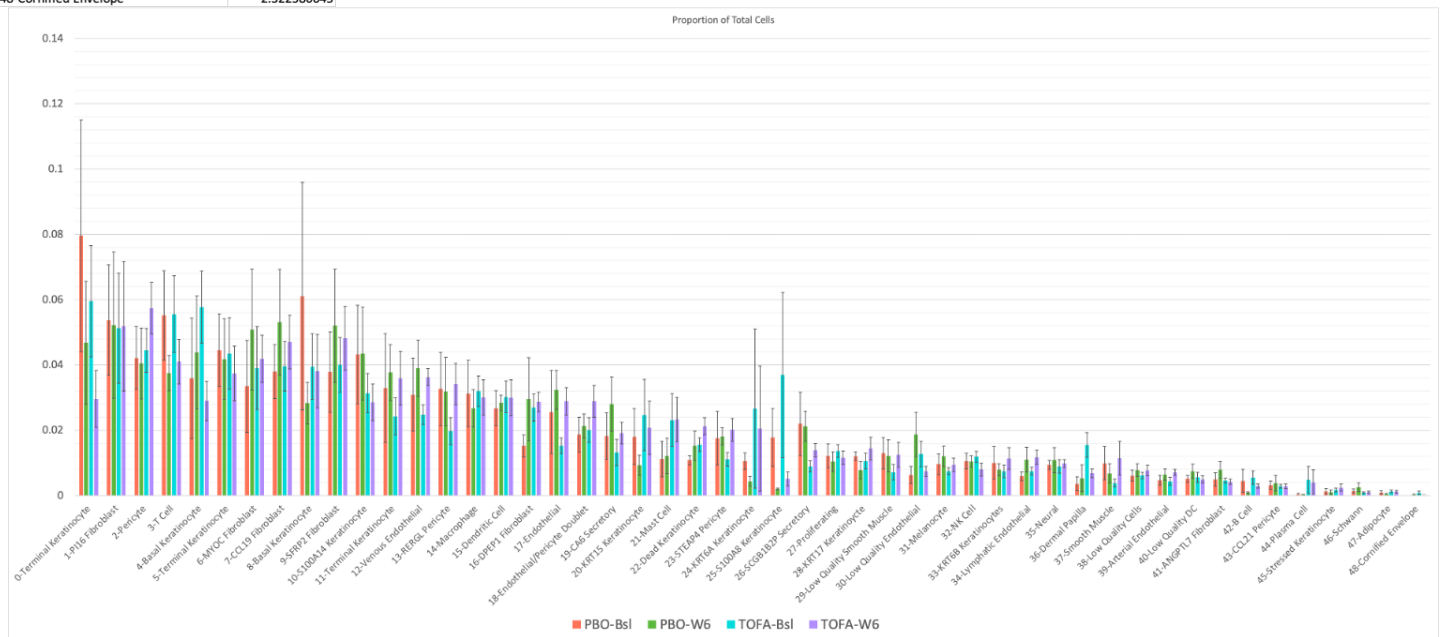

Figure S5. Proportions of cells in each cluster (panel A). Proportions of cells in each cluster by treatment group at baseline and week 6 skin biopsies (panel B). Error bars indicate standard deviation between samples in each group.

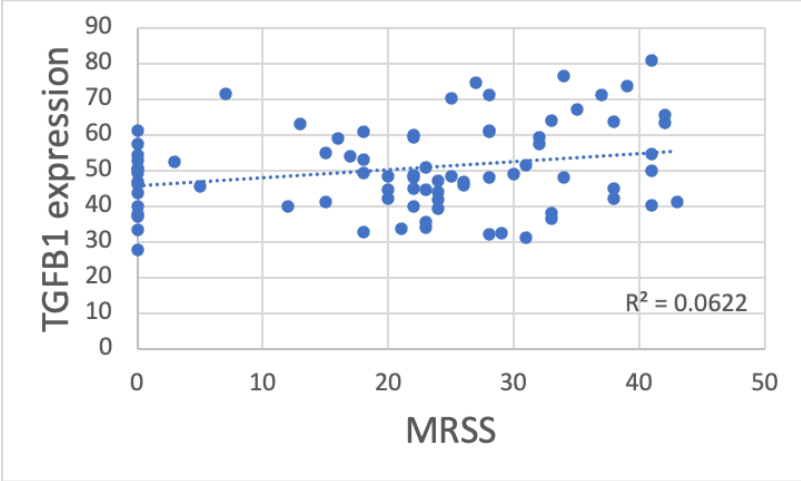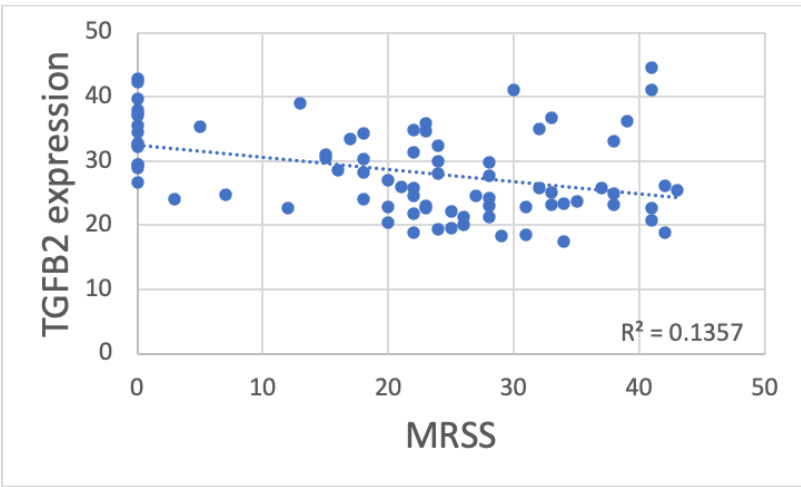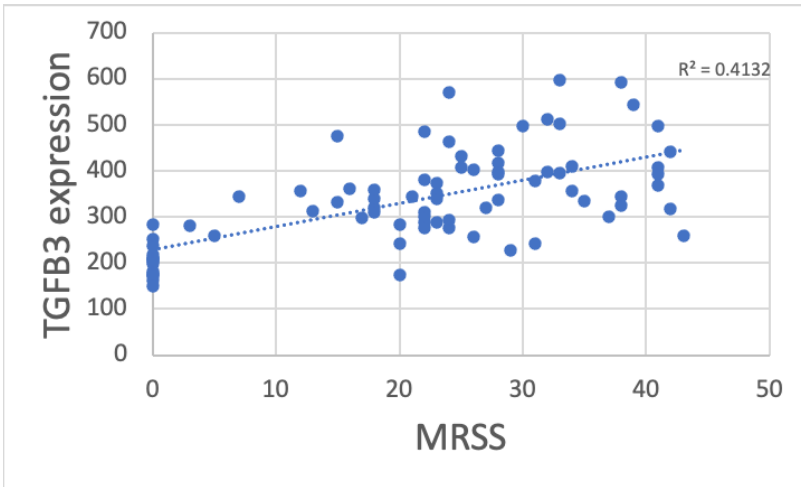

Fig. S6- Bulk skin gene expression from patients with dcSSc, correlations with TGFB isoform expression

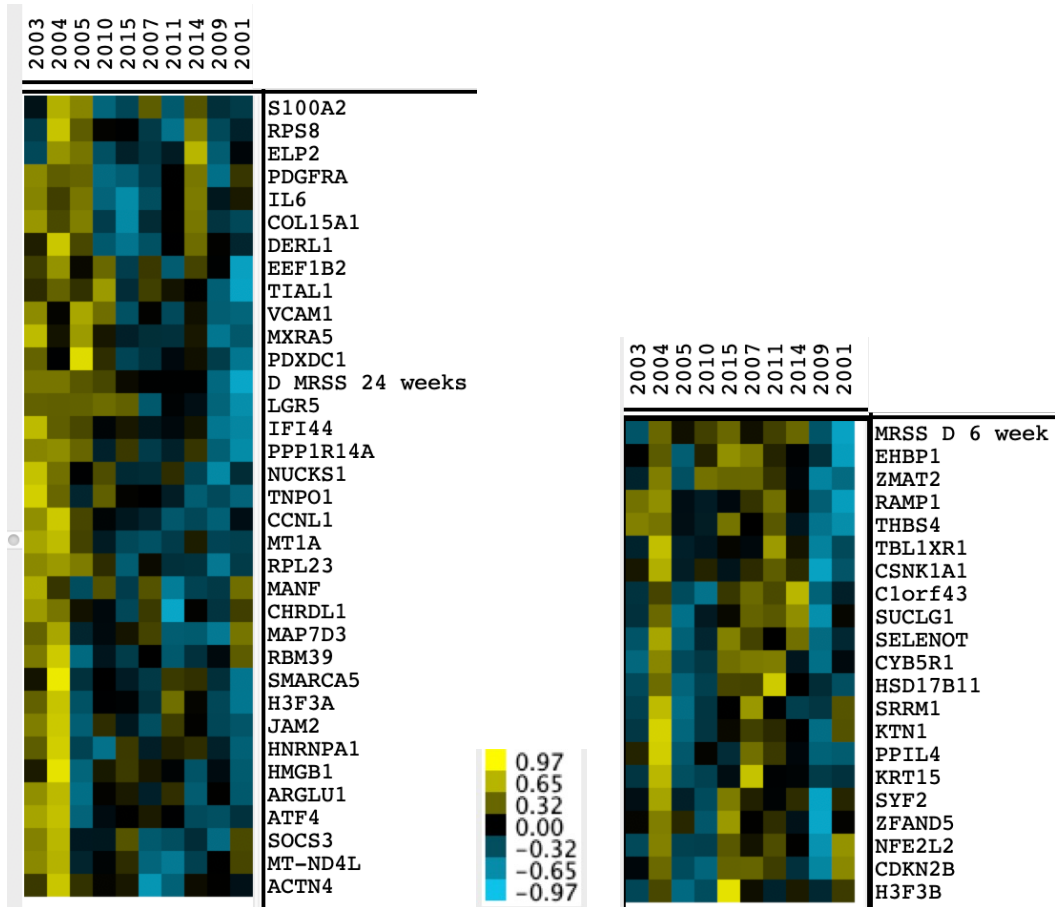

**Figure S7. Change in gene expression by cluster of SFRP2/DPP4 fibroblast genes, comparing week 6 to baseline.** Normalized change in MRSS is included in the clustering algorithm. Columns are arranged by change in MRSS at 24 weeks with increased (worsening) skin score (yellow) to the left and decreased (improved) skin score (blue) to the right. Genes are shown that cluster with change in MRSS at 24 weeks (D MRSS 24 weeks, left panel) or with change in MRSS at 6 weeks (D MRSS 6 weeks, right panel). Analysis of genes in clusters by Gene Ontology did not indicate and statistically significant Gene Ontology pathways.

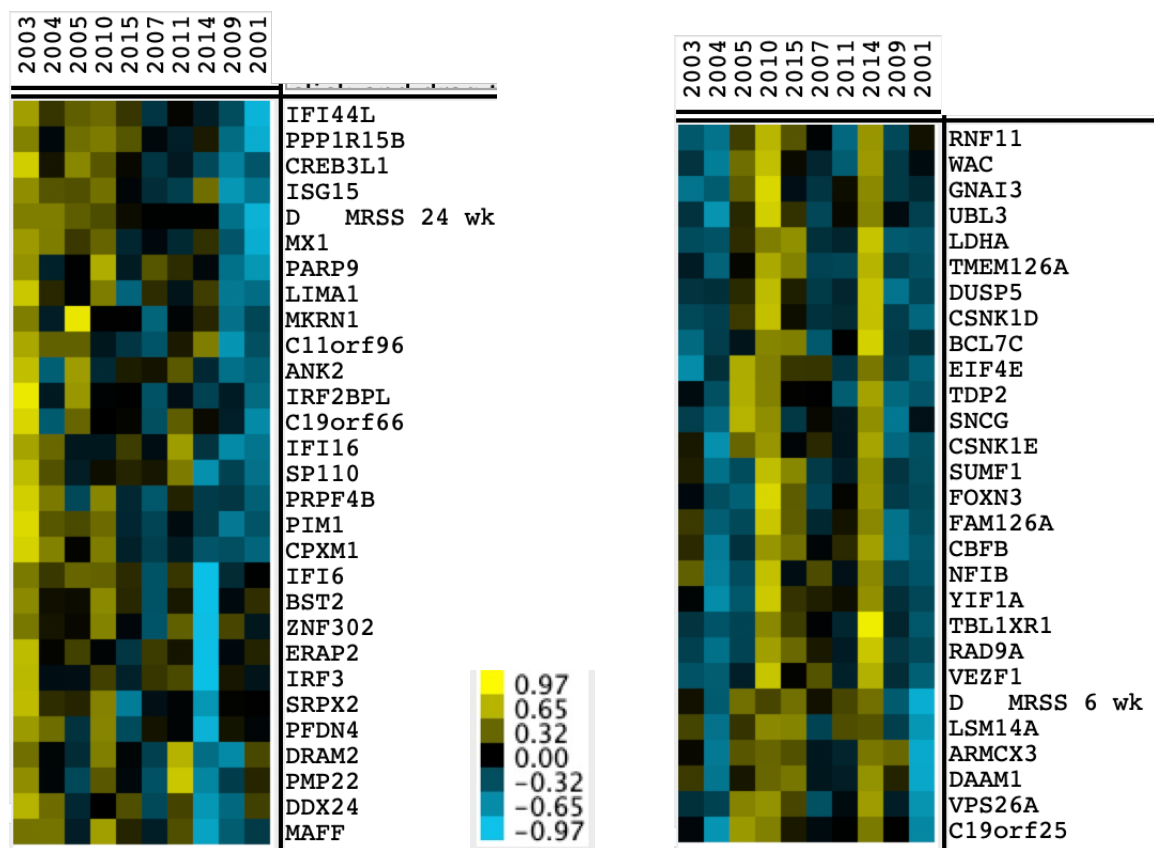

Figure S8. Change in gene expression by cluster of MYOC/CCL19 fibroblast genes, comparing week 6 to baseline. Normalized change in MRSS is included in the clustering algorithm. Columns are arranged by change in MRSS at 24 weeks with increased (worsening) skin score (yellow) to the left and decreased (improved) skin score (blue) to the right. Genes are shown that cluster with change in MRSS at 24 weeks (D MRSS 24 weeks, left panel) or with change in MRSS at 6 weeks (D MRSS 6 weeks, right panel). 24-week cluster genes indicated Gene Ontology pathways: Response to virus and response to type 1 interferon

Fig. S9-Ingenuity Pathway Analysis of scRNA-seq from myeloid populations. Pathway analysis of myeloid scRNA-seq data from baseline study biopsies (n=15), analyzed together with scRNA-seq data from previously described dcSSc (n=12) and healthy skin (n=10). Selected pathways from cluster 14, clustered with analogous cells in previous studies, representing macrophages (panel A) and cluster 15 clustered with analogous cells in previous studies representing DCs (panel C). Genes correlating with baseline MRSS (uncorrected  $p < 0.05$ ) were included in the pathway analysis. Only selected significant pathways ( $-\log(p\text{-value}) < 1.4$ ) are indicated. Yellow bars indicate positive associations with IPA expected direction of regulation; blue bars show negative associations with expected direction of regulation; open bars indicate no associations with IPA expected direction of regulation; and grey bars indicate no expected direction of regulation. Clustering of changes in pseudo-bulk gene expression in macrophages (cluster 14, panel B) and dendritic cells (cluster 15, panel D) at 6-week compared to baseline in tofacitinib-treated patients of all (filtered) genes, showing co-regulated genes clustering with STAT3 (indicated by red stars).

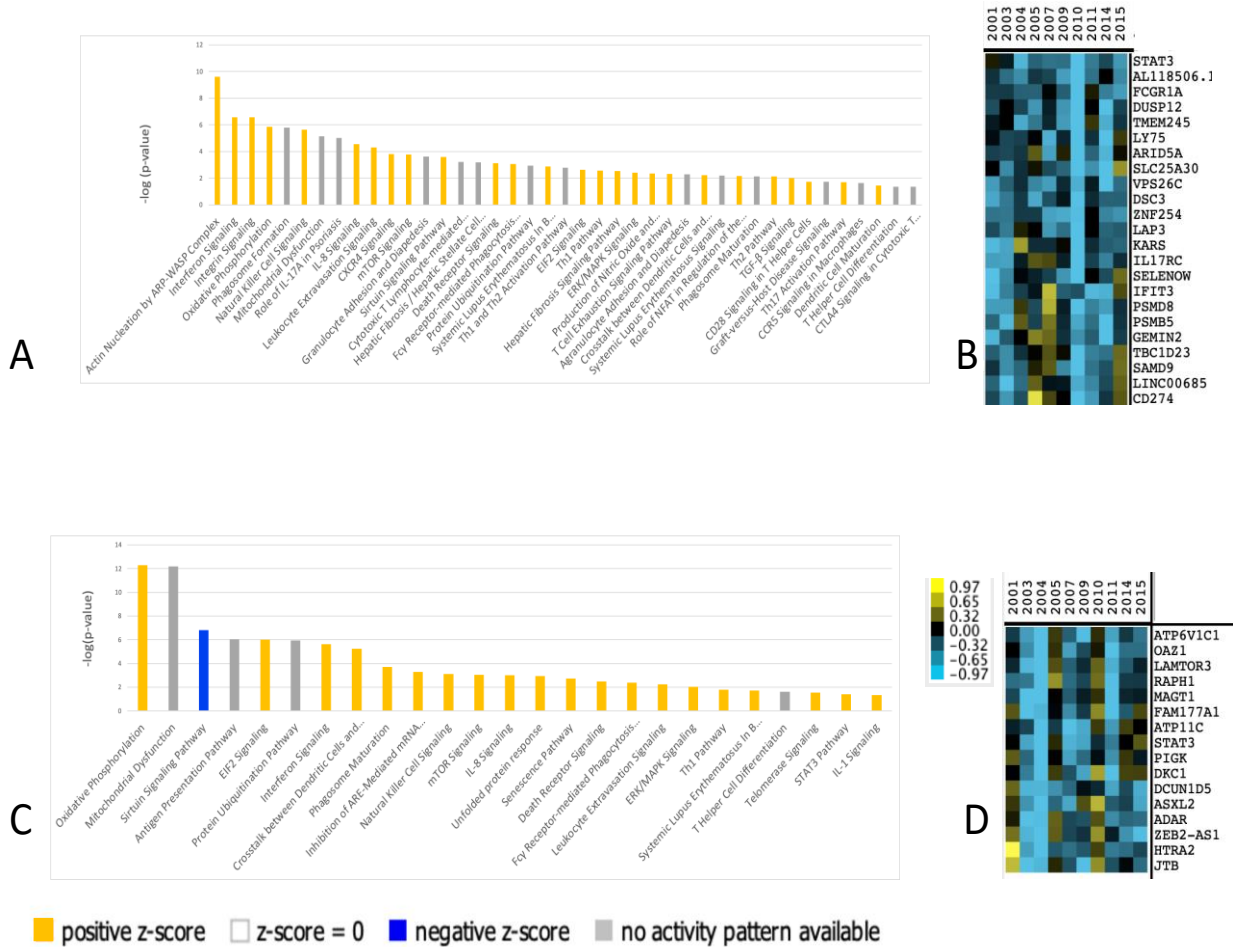

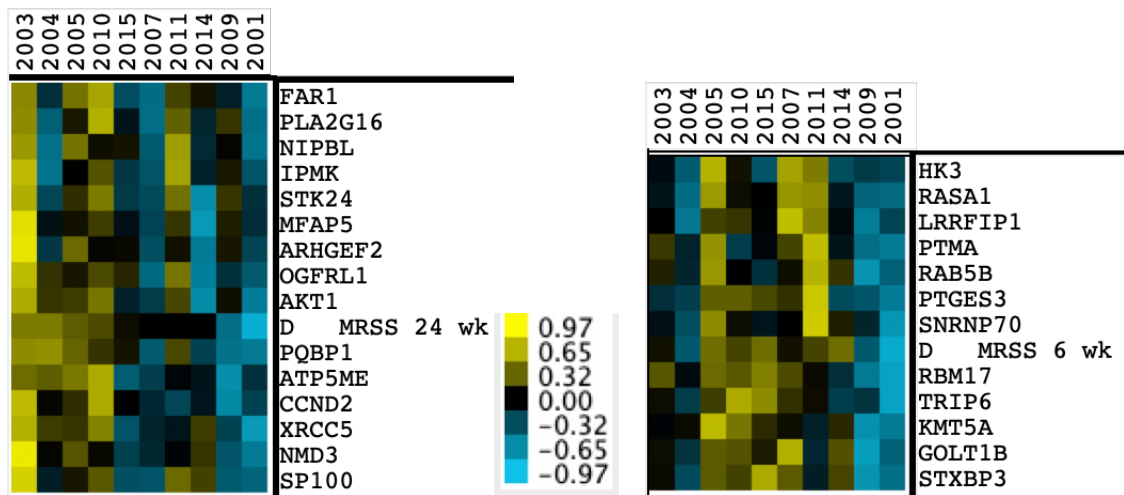

Figure S10. Change in gene expression by cluster of macrophage genes, comparing week 6 to baseline. Normalized change in MRSS is included in the clustering algorithm. Columns are arranged by change in MRSS at 24 weeks with increased (worsening) skin score (yellow) to the left and decreased (improved) skin score (blue) to the right. Genes are shown that cluster with change in MRSS at 24 weeks (D MRSS 24 weeks, left panel) or with change in MRSS at 6 weeks (D MRSS 6 weeks, right panel). Analysis of genes in clusters by Gene Ontology did not indicate any statistically significant pathways.

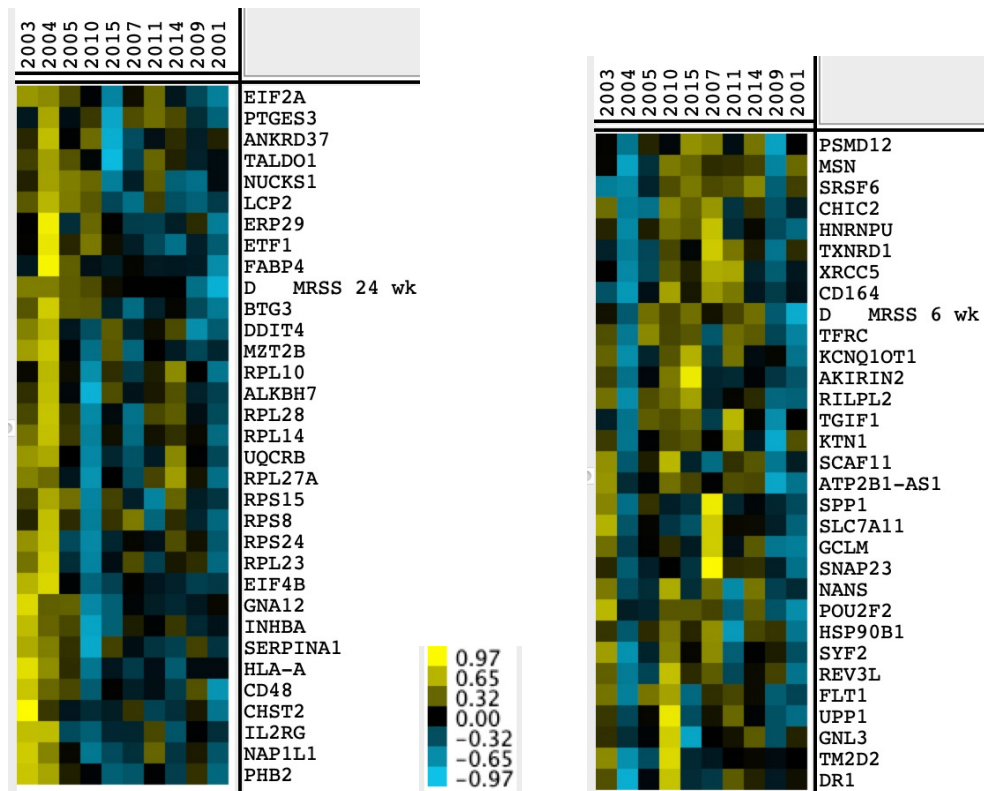

Figure S11. Change in gene expression by cluster of dendritic cell genes, comparing week 6 to baseline. Normalized change in MRSS is included in the clustering algorithm. Columns are arranged by change in MRSS at 24 weeks with increased (worsening) skin score (yellow) to the left and decreased (improved) skin score (blue) to the right. Genes are shown that cluster with change in MRSS at 24 weeks (D MRSS 24 weeks, left panel) or with change in MRSS at 6 weeks (D MRSS 6 weeks, right panel). Analysis of genes in clusters by Gene Ontology did not indicate and statistically significant pathways.

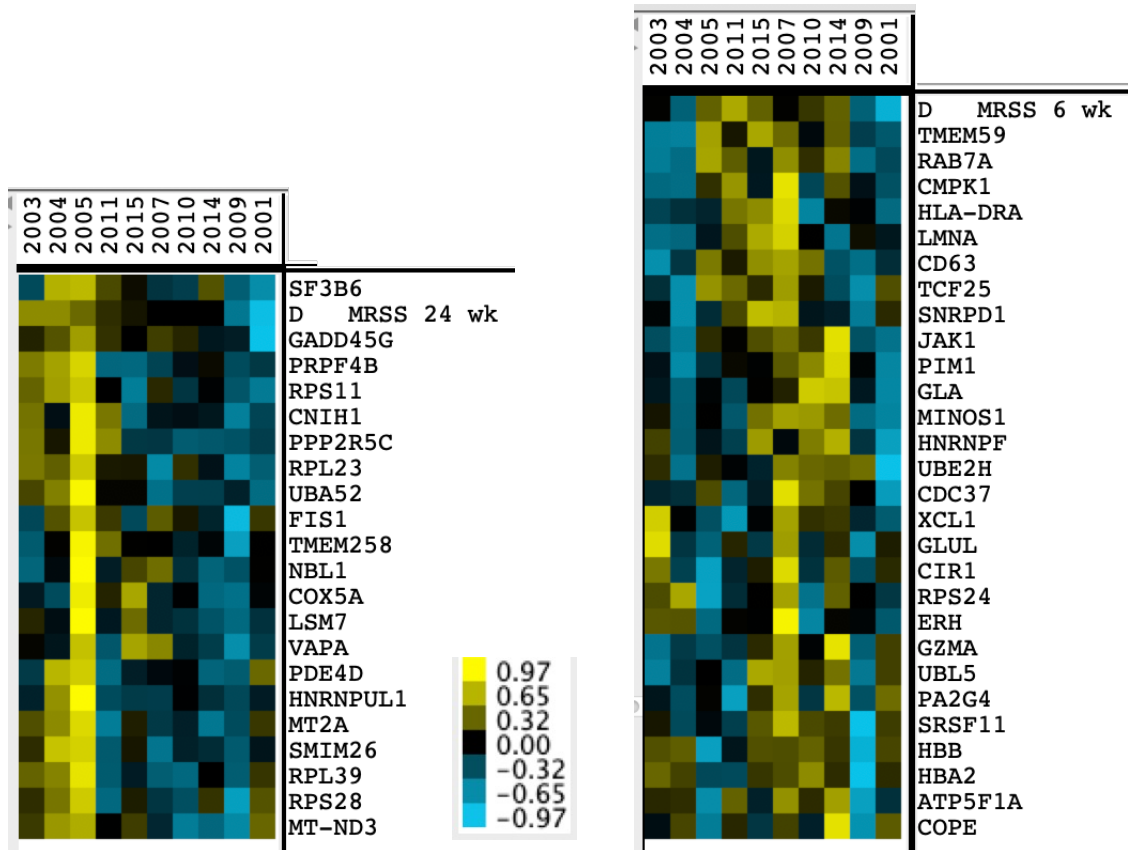

Figure S12. Change in gene expression by cluster of T cell genes, comparing week 6 to baseline. Normalized change in MRSS is included in the clustering algorithm. Columns are arranged by change in MRSS at 24 weeks with increased (worsening) skin score (yellow) to the left and decreased (improved) skin score (blue) to the right. Genes are shown that cluster with change in MRSS at 24 weeks (D MRSS 24 weeks, left panel) or with change in MRSS at 6 weeks (D MRSS 6 weeks, right panel). Analysis of genes in clusters by Gene Ontology did not indicate any statistically significant pathways.

**Supplementary Table 1: Baseline and Demographics Characteristics**

|                                                     | Double Blind Trial |                       |                  | Open Label Extension |                       |                  |
|-----------------------------------------------------|--------------------|-----------------------|------------------|----------------------|-----------------------|------------------|
|                                                     | Overall<br>(N=15)  | Tofacitinib<br>(N=10) | Placebo<br>(N=5) | Overall<br>(N=14)    | Tofacitinib<br>(N=10) | Placebo<br>(N=4) |
| Age, Years, mean (SD)                               | 50.8 (14.0)        | 46.2 (13.9)           | 60.0 (9.7)       | 49.7 (13.9)          | 46.2 (13.9)           | 58.4 (10.5)      |
| Female, N (%)                                       | 10.0 (66.7)        | 7.0 (70.0)            | 3.0 (60.0)       | 9 (64.3)             | 7.0 (70.0)            | 2.0 (50.0)       |
| White, N (%)                                        | 14.0 (93.3)        | 10.0 (100.0)          | 4.0 (80.0)       | 13.0 (92.9)          | 10.0 (100.0)          | 3.0 (75.0)       |
| Not Hispanic or Latino, N (%)                       | 15.0 (100.0)       | 10.0 (100.0)          | 5.0 (100.0)      | 14.0 (100.0)         | 10.0 (100.0)          | 4.0 (100.0)      |
| Disease Duration, Years*, mean (SD)                 | 2.1 (1.2)          | 2.0 (1.3)             | 2.4 (1.2)        | 2.0 (1.2)            | 2.0 (1.3)             | 2.1 (1.1)        |
| mRSS, mean (SD)                                     | 23.3 (8.4)         | 22.7 (9.3)            | 24.4 (6.9)       | 22.8 (8.5)           | 22.7 (9.3)            | 23.0 (7.1)       |
| FVC% Predicted, mean (SD)                           | 88.4 (16.6)        | 90.7 (16.5)           | 83.8 (17.5)      | 88.2 (17.2)          | 90.7 (16.5)           | 82.0 (19.6)      |
| DLCO% Predicted, Uncorrected for Hgb, mean (SD)     | 85.6 (19.8)        | 82.4 (19.7)           | 92.0 (20.5)      | 86.2 (20.4)          | 82.4 (19.7)           | 95.8 (21.6)      |
| Patient Global Assessment, mean (SD) <sup>1</sup>   | 4.3 (2.2)          | 3.8 (1.9)             | 5.4 (2.6)        | 4.3 (2.3)            | 3.8 (1.9)             | 5.5 (3.0)        |
| HAQ-DI, mean (SD) <sup>2</sup>                      | 1.0 (0.6)          | 1.1 (0.6)             | 0.8 (0.5)        | 0.9 (0.6)            | 1.1 (0.6)             | 0.6 (0.3)        |
| Physician Global Assessment, mean (SD) <sup>1</sup> | 5.3 (1.7)          | 5.6 (1.8)             | 4.8 (1.6)        | 5.3 (1.8)            | 5.6 (1.8)             | 4.5 (1.7)        |
| Tendon Friction Rubs, N (%)                         | 2.0 (13.3)         | 1.0 (10.0)            | 1.0 (20.0)       | 2.0 (14.3)           | 1.0 (10.0)            | 1.0 (25.0)       |
| Large Joint Contractures, N (%)                     | 5.0 (33.3)         | 5.0 (50.0)            | 0.0 (0.0)        | 5.0 (35.7)           | 5.0 (50.0)            | 0.0 (0.0)        |
| Background Immunosuppressive, N (%)                 | 13.0 (86.7)        | 9.0 (90.0)            | 4.0 (80.0)       | 12.0 (85.7)          | 9.0 (90.0)            | 3.0 (75.0)       |
| Mycophenolate mofetil, N (%)                        | 13.0 (86.7)        | 9.0 (90.0)            | 4.0 (80.0)       | 12.0 (85.7)          | 9.0 (90.0)            | 3.0 (75.0)       |
| Mycophenolate mofetil in mg/day, mean (SD)          | 1500.2 (706.8)     | 1389.1 (781.3)        | 1750.0 (500.0)   | 1541.8 (721.3)       | 1389.1 (781.3)        | 2000.0 (0.0)     |
| Methotrexate, mg/week., N (%)                       | 2.0 (13.3)         | 1.0 (10.0)            | 1.0 (20.0)       | 2.0 (14.2)           | 1.0 (10.0)            | 1.0 (25.0)       |
| Methotrexate, mg/week, mean (SD)                    | 25.0 (0.0)         | 25.0 (-)              | 25.0 (-)         | 25.0 (0.0)           | 25.0 (-)              | 25.0 (-)         |

|                                      |            |            |            |            |            |            |
|--------------------------------------|------------|------------|------------|------------|------------|------------|
| Use of Prednisone, N (%)             | 4.0 (26.7) | 2.0 (20.0) | 2.0 (40.0) | 3.0 (21.4) | 2.0 (20.0) | 1.0 (25.0) |
| Prednisone dose in mg/day, mean (SD) | 8.8 (2.5)  | 7.5 (3.5)  | 10.0 (0.0) | 8.3 (2.9)  | 7.5 (3.5)  | 10.0 (-)   |

\*Disease onset was defined as first non-Raynaud's sign or symptoms; mRSS=modified Rodnan skin score; FVC=Forced vital capacity, DLCO =Diffusion capacity of carbon monoxide; <sup>1</sup>=theoretical range 0-10; <sup>2</sup>=theoretical range 0-3

**Supplementary Table 2: Safety Outcomes during the double blind and open label extension in the RCT**

|                                                         | Double Blinded Trial |                | Open Label Extension                   |                                  |
|---------------------------------------------------------|----------------------|----------------|----------------------------------------|----------------------------------|
|                                                         | Tofacitinib<br>N=10  | Placebo<br>N=5 | Tofacitinib →<br>Tofacitinib<br>N = 10 | Placebo →<br>Tofacitinib<br>N= 4 |
| <b>Grade 3 or Higher AEs</b>                            | 0                    | 0              | 3                                      | 1                                |
| <b>Grade 2 of Higher AEs<sup>1</sup></b>                | 13                   | 10             | 18                                     | 4                                |
| <b>Treatment Emergent AEs</b>                           | 20                   | 14             | 21                                     | 7                                |
| <i>Infections and Infestations</i>                      | 4                    | 2              | 4                                      | 1                                |
| <i>Gastrointestinal Disorders</i>                       | 4                    | 1              | 3                                      | 0                                |
| <i>General Disorders</i>                                | 1                    | 4              | 0                                      | 0                                |
| <i>Musculoskeletal and Connective Tissue Disorders</i>  | 2                    | 3              | 2                                      | 1                                |
| <i>Skin and Subcutaneous Disorder</i>                   | 1                    | 0              | 6                                      | 1                                |
| <i>Investigations</i>                                   | 2                    | 1              | 3                                      | 2                                |
| <i>Respiratory, Thoracic, and Mediastinal Disorders</i> | 2                    | 1              | 1                                      | 0                                |
| <i>Nervous System Disorders</i>                         | 2                    | 0              | 2                                      | 0                                |
| <i>Cardiac Disorders</i>                                | 1                    | 1              | 0                                      | 1                                |
| <i>Renal and Urinary Disorders</i>                      | 0                    | 1              | 0                                      | 1                                |
| <i>Ear and Labyrinth Disorders</i>                      | 1                    | 0              | 0                                      | 0                                |
| <b>AESI</b>                                             | 5                    | 0              | 6                                      | 1                                |
| <i>Serious Infections</i>                               | 0                    | 0              | 1                                      | 0                                |
| <i>Infections Requiring Treatment</i>                   | 4                    | 0              | 2                                      | 0                                |
| Otitis Externa                                          | 1                    | 0              | 0                                      | 0                                |
| Urinary Tract Infection                                 | 2                    | 0              | 0                                      | 0                                |
| Digital Ulcer Infection                                 | 1                    | 0              | 1                                      | 0                                |
| CMV                                                     | 0                    | 0              | 1                                      | 0                                |
| <i>Gastrointestinal Perforations</i>                    | 0                    | 0              | 0                                      | 0                                |
| <i>Herpes Zoster</i>                                    | 0                    | 0              | 1                                      | 0                                |
| <i>Malignancies</i>                                     | 0                    | 0              | 0                                      | 0                                |

|                                                      |   |   |   |   |
|------------------------------------------------------|---|---|---|---|
| <b><i>Gastrointestinal Perforations</i></b>          | 0 | 0 | 0 | 0 |
| <b><i>Laboratories Abnormalities<sup>3</sup></i></b> | 1 | 0 | 2 | 1 |
| Hypercholesterolemia                                 | 0 | 0 | 1 | 0 |
| Hypertriglyceridemia                                 | 0 | 0 | 1 | 0 |
| HDL>50% <sup>4</sup>                                 | 1 | 0 | 0 | 1 |

AE= Adverse Event; AESI= Adverse Event of Special Interest; CMV= Cytomegalovirus; HDL= high-density lipoproteins

<sup>1</sup> Grade 2: Moderate; minimal, local or non-invasive intervention indicated; limiting age-appropriate instrumental ADL (activities of daily living)

<sup>2</sup> Two participants had UTI

<sup>3</sup> Additional lab values included per protocol as AEs of special interest of which did not occur during the study include: Hb  $\leq$  8 gm/dL, Hb drop by  $>2$  gm/dL, AST/ALT  $>3$  ULN, increase in serum creatinine  $>50\%$ , Hy's law= ALT  $> 3x$  ULN + bilirubin  $> 2x$  ULN Lymphocyte count less than 500 cells/mm<sup>3</sup>, ANC less than 500 cells/mm<sup>3</sup>

<sup>4</sup> Reported as AE of special interest per protocol as tofacitinib can impact lipids but was not considered clinically significant.

**Supplementary Table 3: Secondary Endpoints at Week 24 and Week 48 – Efficacy: Changes from Baseline**

|                                    | Double Blind Trial (Week 24) |                   |                                 |         | Open label Extension (Week 48)  |                             |                                 |         |
|------------------------------------|------------------------------|-------------------|---------------------------------|---------|---------------------------------|-----------------------------|---------------------------------|---------|
|                                    | Median (IQR)                 |                   | Difference of median (95% CI) ¶ | P-Value | Median (IQR)                    |                             | Difference of median (95% CI) ¶ | P-Value |
|                                    | Tofacitinib (N = 10)         | Placebo (N = 4)   |                                 |         | Tofacitinib→Tofacitinib (N = 8) | Placebo→Tofacitinib (N = 3) |                                 |         |
| <b>mRSS</b>                        | -5.5 (-6.0, -1.0)            | -2.5 (-7.5, 2.5)  | -3.0 (-12.0, 6.0)               | 0.47    | -12.5 (-15.5, -5.5)             | -9.0 (-11.0, -9.0)          | -3.5 (-7.0, 5.0)                | 0.60    |
| <b>Patient Global Assessment</b>   | 0.0 (-1.0, 1.0)              | -1.5 (-5.0, -0.5) | 1.5 (0.0, 8.0)                  | 0.16    | -0.5 (-1.5, 1.0)                | 0.0 (-8.0, 5.0)             | -0.5 (-6.0, 8.0)                | 0.85    |
| <b>Physician Global Assessment</b> | -1.5 (-3.0, -1.0)            | 0.5 (0.0, 1.0)    | -2.0 (-3.0, 2.0)                | 0.03    | -3.5 (-4.0, -1.0)               | -1.0 (-2.0, 2.0)            | -2.5 (-6.0, 1.0)                | 0.15    |
| <b>HAQ-DI</b>                      | -0.1 (-0.3, 0.0)             | 0.13 (0, 0.1)     | -0.2 (-0.4, 0.1)                | 0.30    | -0.4 (-0.4, -0.1)               | 0.1 (-0.1, 0.3)             | -0.5 (-0.6, 0.0)                | 0.07    |
| <b>FVC % Predicted</b>             | -0.5 (-2.0, 6.0)             | 5.0 (2.0, 9.5)    | -5.5 (-14.0, 3.0)               | 0.14    | -1.0 (-6.0, 1.5)                | 4.0 (-3.0, 15.0)            | -5 (-17.0, 7.0)                 | 0.92    |
| <b>ACR</b>                         | 0.3 (0.0, 1.0)               | 0.1 (0.0, 0.6)    | 0.2 (-0.5, 1.0)                 | 0.84    | 1.0 (0.3, 1.0)                  | 0.8 (0.5, 1.0)              | 0.2 (-0.5, 0.5)                 | 0.92    |

\*Negative is improvement for all outcome measures, except FVC% predicted

¶ 95% CI of difference of median was obtained via bootstrapping.

**Supplementary Table 4: Top 50 genes/cluster**

| cluster | gene     | avg_logFC   | pct.1 | pct.2 | p_val | p_val_adj |
|---------|----------|-------------|-------|-------|-------|-----------|
| 0       | KRT1     | 1.9721797   | 1     | 0.56  | 0     | 0         |
| 0       | LYPD3    | 1.850546992 | 0.996 | 0.427 | 0     | 0         |
| 0       | KRT10    | 1.729270499 | 1     | 0.847 | 0     | 0         |
| 0       | SFN      | 1.690887964 | 1     | 0.67  | 0     | 0         |
| 0       | SERPINB2 | 1.609799454 | 0.939 | 0.283 | 0     | 0         |
| 0       | DMKN     | 1.478722092 | 1     | 0.59  | 0     | 0         |
| 0       | AQP3     | 1.415986606 | 0.998 | 0.521 | 0     | 0         |
| 0       | TACSTD2  | 1.350037576 | 0.996 | 0.516 | 0     | 0         |
| 0       | DSP      | 1.308965821 | 0.983 | 0.463 | 0     | 0         |
| 0       | KRTDAP   | 1.248193366 | 0.98  | 0.413 | 0     | 0         |
| 0       | LGALS7B  | 1.210466661 | 0.991 | 0.507 | 0     | 0         |
| 0       | PHLDA2   | 1.181818143 | 0.956 | 0.487 | 0     | 0         |
| 0       | PERP     | 1.179131174 | 1     | 0.696 | 0     | 0         |
| 0       | LY6D     | 1.173808315 | 0.997 | 0.471 | 0     | 0         |
| 0       | S100A14  | 1.171144873 | 0.998 | 0.513 | 0     | 0         |
| 0       | SBSN     | 1.171111544 | 0.941 | 0.257 | 0     | 0         |
| 0       | SERPINB5 | 1.093049992 | 0.972 | 0.351 | 0     | 0         |
| 0       | CLDN1    | 1.081912845 | 0.875 | 0.181 | 0     | 0         |
| 0       | KLF5     | 1.080681255 | 0.985 | 0.456 | 0     | 0         |
| 0       | DSC3     | 1.02554917  | 0.954 | 0.327 | 0     | 0         |
| 0       | CLDN4    | 1.025491772 | 0.839 | 0.17  | 0     | 0         |
| 0       | FGFBP1   | 0.997202261 | 0.727 | 0.157 | 0     | 0         |
| 0       | TUBB2A   | 0.938320162 | 0.979 | 0.607 | 0     | 0         |
| 0       | IRF6     | 0.935430441 | 0.898 | 0.2   | 0     | 0         |
| 0       | TUBA4A   | 0.826132328 | 0.918 | 0.417 | 0     | 0         |
| 0       | EMP2     | 0.809103678 | 0.936 | 0.543 | 0     | 0         |
| 0       | HBEGF    | 0.788268529 | 0.713 | 0.219 | 0     | 0         |
| 0       | EHF      | 0.777897794 | 0.786 | 0.146 | 0     | 0         |
| 0       | CCL27    | 0.773184177 | 0.823 | 0.201 | 0     | 0         |
| 0       | PKP1     | 0.771037033 | 0.869 | 0.209 | 0     | 0         |
| 0       | SLC38A2  | 0.768709538 | 0.948 | 0.674 | 0     | 0         |
| 0       | DSG1     | 0.765928829 | 0.832 | 0.175 | 0     | 0         |
| 0       | KRT2     | 0.740697298 | 0.782 | 0.303 | 0     | 0         |
| 0       | KLF4     | 0.735338597 | 0.979 | 0.728 | 0     | 0         |
| 0       | EZR      | 0.729793725 | 0.96  | 0.513 | 0     | 0         |
| 0       | LGALS7   | 0.726599185 | 0.603 | 0.247 | 0     | 0         |
| 0       | BAZ1A    | 0.724494588 | 0.886 | 0.432 | 0     | 0         |
| 0       | HCAR3    | 0.713847244 | 0.593 | 0.087 | 0     | 0         |
| 0       | TUBA1C   | 0.713381445 | 0.931 | 0.564 | 0     | 0         |
| 0       | DEFB1    | 0.70516673  | 0.801 | 0.166 | 0     | 0         |
| 0       | EPHA2    | 0.703229294 | 0.771 | 0.18  | 0     | 0         |
| 0       | ADRB2    | 0.691787991 | 0.766 | 0.219 | 0     | 0         |
| 0       | KLK11    | 0.681565136 | 0.79  | 0.188 | 0     | 0         |
| 0       | NXF1     | 0.675920772 | 0.8   | 0.266 | 0     | 0         |
| 0       | SOX15    | 0.674582431 | 0.857 | 0.244 | 0     | 0         |
| 0       | DYNLL1   | 0.669257776 | 0.997 | 0.946 | 0     | 0         |
| 0       | ABHD5    | 0.669188715 | 0.814 | 0.287 | 0     | 0         |
| 0       | CD55     | 0.664371336 | 0.852 | 0.461 | 0     | 0         |
| 0       | DNAJA1   | 0.661836801 | 0.996 | 0.82  | 0     | 0         |
| 0       | PLIN3    | 0.660561808 | 0.818 | 0.292 | 0     | 0         |
| 1       | COL1A1   | 2.494484638 | 0.999 | 0.468 | 0     | 0         |
| 1       | LUM      | 2.470142997 | 0.99  | 0.276 | 0     | 0         |
| 1       | PI16     | 2.398787847 | 0.84  | 0.08  | 0     | 0         |
| 1       | COL1A2   | 2.395930304 | 1     | 0.455 | 0     | 0         |
| 1       | COL3A1   | 2.313007362 | 0.987 | 0.369 | 0     | 0         |

|   |          |             |       |       |   |   |
|---|----------|-------------|-------|-------|---|---|
| 1 | MMP2     | 2.295657587 | 0.997 | 0.222 | 0 | 0 |
| 1 | COMP     | 2.278187714 | 0.585 | 0.062 | 0 | 0 |
| 1 | FBLN1    | 2.275928895 | 0.979 | 0.281 | 0 | 0 |
| 1 | ELN      | 2.270597391 | 0.931 | 0.13  | 0 | 0 |
| 1 | DCN      | 2.241280591 | 0.999 | 0.542 | 0 | 0 |
| 1 | SFRP2    | 2.23657602  | 0.919 | 0.131 | 0 | 0 |
| 1 | CTHRC1   | 2.14006806  | 0.964 | 0.146 | 0 | 0 |
| 1 | SPARC    | 2.094846179 | 0.997 | 0.58  | 0 | 0 |
| 1 | WISP2    | 1.967734922 | 0.87  | 0.111 | 0 | 0 |
| 1 | CTSK     | 1.966815892 | 0.973 | 0.179 | 0 | 0 |
| 1 | CCDC80   | 1.89346588  | 0.988 | 0.314 | 0 | 0 |
| 1 | MFAP5    | 1.893462828 | 0.869 | 0.087 | 0 | 0 |
| 1 | FBLN2    | 1.785986336 | 0.971 | 0.188 | 0 | 0 |
| 1 | FSTL1    | 1.784700341 | 0.982 | 0.232 | 0 | 0 |
| 1 | DPT      | 1.771833536 | 0.916 | 0.139 | 0 | 0 |
| 1 | CFD      | 1.750398537 | 0.918 | 0.463 | 0 | 0 |
| 1 | POSTN    | 1.714477826 | 0.688 | 0.187 | 0 | 0 |
| 1 | MFAP4    | 1.703140524 | 0.969 | 0.245 | 0 | 0 |
| 1 | IGFBP4   | 1.669672589 | 0.98  | 0.461 | 0 | 0 |
| 1 | COL6A2   | 1.616637099 | 1     | 0.483 | 0 | 0 |
| 1 | BGN      | 1.603122288 | 0.807 | 0.315 | 0 | 0 |
| 1 | CTGF     | 1.54839032  | 0.797 | 0.239 | 0 | 0 |
| 1 | AEBP1    | 1.544983992 | 0.969 | 0.215 | 0 | 0 |
| 1 | PLAC9    | 1.533499308 | 0.972 | 0.336 | 0 | 0 |
| 1 | C1R      | 1.499934416 | 0.975 | 0.366 | 0 | 0 |
| 1 | CXCL14   | 1.492440577 | 0.953 | 0.755 | 0 | 0 |
| 1 | COL6A1   | 1.488339336 | 0.995 | 0.411 | 0 | 0 |
| 1 | SERPINF1 | 1.480424092 | 0.964 | 0.361 | 0 | 0 |
| 1 | FBN1     | 1.439424424 | 0.9   | 0.104 | 0 | 0 |
| 1 | THY1     | 1.384947559 | 0.902 | 0.183 | 0 | 0 |
| 1 | HTRA1    | 1.376671187 | 0.964 | 0.246 | 0 | 0 |
| 1 | MXRA8    | 1.355976358 | 0.932 | 0.176 | 0 | 0 |
| 1 | C1S      | 1.315712363 | 0.987 | 0.322 | 0 | 0 |
| 1 | LOX      | 1.308321032 | 0.878 | 0.093 | 0 | 0 |
| 1 | FN1      | 1.305568852 | 0.872 | 0.191 | 0 | 0 |
| 1 | PCOLCE   | 1.300190598 | 0.947 | 0.294 | 0 | 0 |
| 1 | S100A6   | 1.266964518 | 1     | 0.819 | 0 | 0 |
| 1 | TIMP1    | 1.266713308 | 0.992 | 0.569 | 0 | 0 |
| 1 | CD99     | 1.259055608 | 0.997 | 0.689 | 0 | 0 |
| 1 | TIMP2    | 1.257112648 | 0.956 | 0.257 | 0 | 0 |
| 1 | MGP      | 1.245660264 | 0.955 | 0.471 | 0 | 0 |
| 1 | THBS2    | 1.244402591 | 0.865 | 0.131 | 0 | 0 |
| 1 | LGALS1   | 1.223946633 | 1     | 0.658 | 0 | 0 |
| 1 | C1QTNF3  | 1.223855103 | 0.659 | 0.021 | 0 | 0 |
| 1 | COL6A3   | 1.200556785 | 0.904 | 0.18  | 0 | 0 |
| 2 | CCL2     | 2.628897911 | 0.973 | 0.484 | 0 | 0 |
| 2 | RGS16    | 2.330185935 | 0.955 | 0.285 | 0 | 0 |
| 2 | C11orf96 | 2.219597803 | 0.926 | 0.161 | 0 | 0 |
| 2 | IL6      | 2.103156323 | 0.734 | 0.108 | 0 | 0 |
| 2 | GEM      | 1.901234639 | 0.864 | 0.178 | 0 | 0 |
| 2 | MT1A     | 1.867012416 | 0.808 | 0.073 | 0 | 0 |
| 2 | RGS5     | 1.764812914 | 0.582 | 0.069 | 0 | 0 |
| 2 | CEBPD    | 1.707652687 | 0.986 | 0.813 | 0 | 0 |
| 2 | HSPA6    | 1.672967849 | 0.388 | 0.124 | 0 | 0 |
| 2 | CCL8     | 1.575239345 | 0.387 | 0.03  | 0 | 0 |
| 2 | TAGLN    | 1.521202612 | 0.965 | 0.266 | 0 | 0 |
| 2 | ID4      | 1.515167586 | 0.811 | 0.228 | 0 | 0 |
| 2 | ADAMTS1  | 1.386601822 | 0.856 | 0.216 | 0 | 0 |
| 2 | CRISPLD2 | 1.376030383 | 0.797 | 0.138 | 0 | 0 |
| 2 | ADIRF    | 1.360034192 | 0.995 | 0.617 | 0 | 0 |
| 2 | DDIT4    | 1.353870335 | 0.844 | 0.388 | 0 | 0 |
| 2 | JUNB     | 1.347477541 | 0.999 | 0.96  | 0 | 0 |
| 2 | ACTA2    | 1.304942552 | 0.854 | 0.156 | 0 | 0 |
| 2 | SOCS3    | 1.285773186 | 0.952 | 0.581 | 0 | 0 |

|   |          |             |       |       |           |           |
|---|----------|-------------|-------|-------|-----------|-----------|
| 2 | CXCL2    | 1.277341507 | 0.523 | 0.193 | 0         | 0         |
| 2 | GADD45B  | 1.273099563 | 0.985 | 0.705 | 0         | 0         |
| 2 | TPM2     | 1.254411591 | 0.879 | 0.2   | 0         | 0         |
| 2 | MYL9     | 1.235287862 | 0.957 | 0.438 | 0         | 0         |
| 2 | ZFP36    | 1.214255037 | 0.994 | 0.893 | 0         | 0         |
| 2 | GJA4     | 1.200763079 | 0.604 | 0.047 | 0         | 0         |
| 2 | ZNF331   | 1.193953963 | 0.624 | 0.121 | 0         | 0         |
| 2 | CDKN1A   | 1.152623858 | 0.968 | 0.738 | 0         | 0         |
| 2 | IGFBP5   | 1.149773873 | 0.744 | 0.217 | 0         | 0         |
| 2 | PPP1R15A | 1.145511173 | 0.995 | 0.842 | 0         | 0         |
| 2 | IER3     | 1.137740152 | 0.943 | 0.774 | 0         | 0         |
| 2 | LBH      | 1.12917487  | 0.777 | 0.168 | 0         | 0         |
| 2 | TINAGL1  | 1.128646308 | 0.857 | 0.124 | 0         | 0         |
| 2 | RRAD     | 1.127415462 | 0.633 | 0.072 | 0         | 0         |
| 2 | ATF3     | 1.108938187 | 0.911 | 0.542 | 0         | 0         |
| 2 | NR4A1    | 1.092985563 | 0.893 | 0.474 | 0         | 0         |
| 2 | IRF1     | 1.077124519 | 0.928 | 0.547 | 0         | 0         |
| 2 | MT2A     | 1.061117261 | 0.949 | 0.797 | 0         | 0         |
| 2 | CRYAB    | 1.031311901 | 0.714 | 0.435 | 0         | 0         |
| 2 | CPE      | 1.026039324 | 0.902 | 0.226 | 0         | 0         |
| 2 | ADAMTS4  | 1.00887127  | 0.605 | 0.087 | 0         | 0         |
| 2 | MT1M     | 1.000852215 | 0.729 | 0.178 | 0         | 0         |
| 2 | RERGL    | 0.992164878 | 0.448 | 0.033 | 0         | 0         |
| 2 | NDUFA4L2 | 0.981254763 | 0.605 | 0.224 | 0         | 0         |
| 2 | IGFBP7   | 0.97891793  | 1     | 0.632 | 0         | 0         |
| 2 | MYC      | 0.956012572 | 0.927 | 0.694 | 0         | 0         |
| 2 | ADRA2A   | 0.928439339 | 0.623 | 0.057 | 0         | 0         |
| 2 | CALD1    | 0.912099848 | 0.964 | 0.563 | 0         | 0         |
| 2 | PHLDA1   | 0.911699224 | 0.656 | 0.196 | 0         | 0         |
| 2 | CSRNP1   | 0.886164389 | 0.748 | 0.27  | 0         | 0         |
| 2 | CYCS     | 1.026872748 | 0.842 | 0.69  | 2.48E-289 | 5.90E-285 |
| 3 | CXCR4    | 1.945957378 | 0.822 | 0.068 | 0         | 0         |
| 3 | IL32     | 1.726271481 | 0.82  | 0.119 | 0         | 0         |
| 3 | SRGN     | 1.660338349 | 0.914 | 0.162 | 0         | 0         |
| 3 | CD52     | 1.574453432 | 0.783 | 0.039 | 0         | 0         |
| 3 | CREM     | 1.567299558 | 0.781 | 0.189 | 0         | 0         |
| 3 | LTB      | 1.468084389 | 0.628 | 0.018 | 0         | 0         |
| 3 | DUSP2    | 1.464595834 | 0.785 | 0.165 | 0         | 0         |
| 3 | KLRB1    | 1.319011537 | 0.319 | 0.009 | 0         | 0         |
| 3 | CD69     | 1.293689362 | 0.575 | 0.021 | 0         | 0         |
| 3 | SARAF    | 1.228559464 | 0.88  | 0.523 | 0         | 0         |
| 3 | SAMSN1   | 1.199136927 | 0.639 | 0.035 | 0         | 0         |
| 3 | TRAC     | 1.177242809 | 0.649 | 0.033 | 0         | 0         |
| 3 | RGS1     | 1.161882269 | 0.443 | 0.038 | 0         | 0         |
| 3 | ARHGDI3  | 1.137198353 | 0.771 | 0.248 | 0         | 0         |
| 3 | BTG1     | 1.117889638 | 0.998 | 0.9   | 0         | 0         |
| 3 | BIRC3    | 1.082859996 | 0.634 | 0.152 | 0         | 0         |
| 3 | TRBC2    | 1.080243422 | 0.548 | 0.007 | 0         | 0         |
| 3 | CCL5     | 1.076003937 | 0.332 | 0.017 | 0         | 0         |
| 3 | RGCC     | 1.04842238  | 0.651 | 0.22  | 0         | 0         |
| 3 | TRBC1    | 1.038520198 | 0.432 | 0.006 | 0         | 0         |
| 3 | CD3D     | 1.022603216 | 0.614 | 0.003 | 0         | 0         |
| 3 | CYTIP    | 1.002076549 | 0.573 | 0.038 | 0         | 0         |
| 3 | CORO1A   | 0.984013445 | 0.629 | 0.046 | 0         | 0         |
| 3 | DUSP4    | 0.971700568 | 0.43  | 0.072 | 0         | 0         |
| 3 | IL7R     | 0.970639105 | 0.512 | 0.009 | 0         | 0         |
| 3 | TMSB4X   | 0.962686217 | 1     | 0.993 | 0         | 0         |
| 3 | ZFP36L2  | 0.962027585 | 0.965 | 0.84  | 0         | 0         |
| 3 | PTPRC    | 0.961326496 | 0.639 | 0.035 | 0         | 0         |
| 3 | CLEC2D   | 0.939780329 | 0.527 | 0.02  | 0         | 0         |
| 3 | RHOH     | 0.921609435 | 0.548 | 0.014 | 0         | 0         |
| 3 | LEPROTL1 | 0.910443436 | 0.58  | 0.119 | 0         | 0         |
| 3 | LAPTM5   | 0.866320028 | 0.662 | 0.083 | 0         | 0         |
| 3 | B2M      | 0.863313069 | 1     | 0.998 | 0         | 0         |

|   |          |             |       |       |           |           |
|---|----------|-------------|-------|-------|-----------|-----------|
| 3 | STK4     | 0.860986076 | 0.619 | 0.11  | 0         | 0         |
| 3 | GPR183   | 0.844011369 | 0.544 | 0.068 | 0         | 0         |
| 3 | RPS29    | 0.842797541 | 1     | 0.999 | 0         | 0         |
| 3 | ACAP1    | 0.832132505 | 0.583 | 0.042 | 0         | 0         |
| 3 | FXYD5    | 0.823399422 | 0.694 | 0.259 | 0         | 0         |
| 3 | CD2      | 0.821229784 | 0.487 | 0.007 | 0         | 0         |
| 3 | HCST     | 0.809206307 | 0.581 | 0.062 | 0         | 0         |
| 3 | EZR      | 0.804303646 | 0.857 | 0.523 | 0         | 0         |
| 3 | CD37     | 0.800053021 | 0.586 | 0.048 | 0         | 0         |
| 3 | RPS27    | 0.789924433 | 1     | 1     | 0         | 0         |
| 3 | NR4A2    | 0.766754962 | 0.617 | 0.251 | 0         | 0         |
| 3 | CD3E     | 0.764850748 | 0.518 | 0.003 | 0         | 0         |
| 3 | ZNF331   | 0.762300844 | 0.552 | 0.126 | 0         | 0         |
| 3 | CD48     | 0.753935359 | 0.53  | 0.028 | 0         | 0         |
| 3 | STK17B   | 0.751686456 | 0.538 | 0.122 | 0         | 0         |
| 3 | ISG20    | 0.750058839 | 0.494 | 0.081 | 0         | 0         |
| 3 | SPOCK2   | 0.748939863 | 0.468 | 0.006 | 0         | 0         |
| 4 | KRT14    | 1.648690938 | 1     | 0.66  | 0         | 0         |
| 4 | KRT15    | 1.591000869 | 0.928 | 0.153 | 0         | 0         |
| 4 | DST      | 1.388283275 | 0.91  | 0.309 | 0         | 0         |
| 4 | S100A2   | 1.328477235 | 0.981 | 0.361 | 0         | 0         |
| 4 | AREG     | 1.213406429 | 0.672 | 0.195 | 0         | 0         |
| 4 | KRT5     | 1.16855723  | 1     | 0.474 | 0         | 0         |
| 4 | COL17A1  | 1.086465996 | 0.868 | 0.122 | 0         | 0         |
| 4 | CCL27    | 0.821915638 | 0.655 | 0.217 | 0         | 0         |
| 4 | SOX15    | 0.785246059 | 0.824 | 0.253 | 0         | 0         |
| 4 | ERRFI1   | 0.78116934  | 0.711 | 0.267 | 0         | 0         |
| 4 | SERPIN2  | 0.7580056   | 0.713 | 0.302 | 0         | 0         |
| 4 | RPLP1    | 0.730798555 | 1     | 1     | 0         | 0         |
| 4 | ADRB2    | 0.718197916 | 0.681 | 0.23  | 0         | 0         |
| 4 | HOPX     | 0.710313226 | 0.871 | 0.37  | 0         | 0         |
| 4 | SYT8     | 0.70154934  | 0.556 | 0.077 | 0         | 0         |
| 4 | DNAJA1   | 0.697824609 | 0.96  | 0.824 | 0         | 0         |
| 4 | KLF5     | 0.689747596 | 0.908 | 0.466 | 0         | 0         |
| 4 | IL18     | 0.644031178 | 0.718 | 0.184 | 0         | 0         |
| 4 | FGFBP1   | 0.628090996 | 0.562 | 0.172 | 0         | 0         |
| 4 | HSPA2    | 0.627514215 | 0.748 | 0.357 | 0         | 0         |
| 4 | ARL4A    | 0.603399912 | 0.695 | 0.279 | 0         | 0         |
| 4 | CKS2     | 0.586938147 | 0.764 | 0.451 | 0         | 0         |
| 4 | TGFBI    | 0.586006822 | 0.716 | 0.264 | 0         | 0         |
| 4 | ATP1B3   | 0.580029377 | 0.945 | 0.632 | 0         | 0         |
| 4 | PMAIP1   | 0.576823684 | 0.699 | 0.276 | 0         | 0         |
| 4 | SFN      | 0.57304413  | 1     | 0.674 | 0         | 0         |
| 4 | FBXW7    | 0.546919241 | 0.688 | 0.23  | 0         | 0         |
| 4 | TOB1     | 0.545247017 | 0.765 | 0.429 | 0         | 0         |
| 4 | ALDH3A1  | 0.54057311  | 0.563 | 0.107 | 0         | 0         |
| 4 | AMD1     | 0.54042605  | 0.828 | 0.564 | 0         | 0         |
| 4 | ZC3H12A  | 0.537845052 | 0.76  | 0.433 | 0         | 0         |
| 4 | AQP3     | 0.534542332 | 0.958 | 0.529 | 0         | 0         |
| 4 | ANKRD37  | 0.53357321  | 0.473 | 0.162 | 0         | 0         |
| 4 | CXADR    | 0.530599713 | 0.708 | 0.232 | 0         | 0         |
| 4 | TGIF1    | 0.530323256 | 0.72  | 0.366 | 0         | 0         |
| 4 | DUSP14   | 0.517176098 | 0.586 | 0.185 | 0         | 0         |
| 4 | MT1X     | 0.511160256 | 0.959 | 0.742 | 0         | 0         |
| 4 | FAM213A  | 0.490734948 | 0.69  | 0.265 | 0         | 0         |
| 4 | NPM1     | 0.488937694 | 0.996 | 0.952 | 0         | 0         |
| 4 | POSTN    | 0.488057662 | 0.752 | 0.186 | 0         | 0         |
| 4 | C19orf33 | 0.472433768 | 0.789 | 0.329 | 0         | 0         |
| 4 | CBR1     | 0.47084275  | 0.719 | 0.348 | 0         | 0         |
| 4 | TIPARP   | 0.466064569 | 0.61  | 0.225 | 0         | 0         |
| 4 | TACSTD2  | 0.460989052 | 0.902 | 0.527 | 0         | 0         |
| 4 | HSP90AA1 | 0.546022259 | 0.995 | 0.97  | 6.57E-295 | 1.56E-290 |
| 4 | KLF4     | 0.473572069 | 0.92  | 0.734 | 1.80E-288 | 4.29E-284 |
| 4 | H2AFZ    | 0.495993611 | 0.955 | 0.823 | 7.39E-286 | 1.76E-281 |

|   |           |             |       |       |           |           |
|---|-----------|-------------|-------|-------|-----------|-----------|
| 4 | MYC       | 0.495912897 | 0.897 | 0.696 | 3.77E-259 | 8.96E-255 |
| 4 | ARID5B    | 0.591231584 | 0.768 | 0.604 | 1.02E-204 | 2.43E-200 |
| 4 | DDX5      | 0.482252127 | 0.967 | 0.934 | 1.89E-189 | 4.50E-185 |
| 5 | KRT2      | 3.43048635  | 0.976 | 0.301 | 0         | 0         |
| 5 | KRTDAP    | 2.704584157 | 0.999 | 0.419 | 0         | 0         |
| 5 | SBSN      | 2.399388647 | 0.992 | 0.264 | 0         | 0         |
| 5 | CALML5    | 2.368178091 | 0.845 | 0.148 | 0         | 0         |
| 5 | KRT10     | 2.131580525 | 1     | 0.849 | 0         | 0         |
| 5 | DMKN      | 2.028034623 | 1     | 0.596 | 0         | 0         |
| 5 | SLURP1    | 1.972533363 | 0.473 | 0.022 | 0         | 0         |
| 5 | SPRR1B    | 1.910948157 | 0.611 | 0.048 | 0         | 0         |
| 5 | FABP5     | 1.897551024 | 0.982 | 0.517 | 0         | 0         |
| 5 | LYPD3     | 1.863607981 | 0.989 | 0.435 | 0         | 0         |
| 5 | CSTA      | 1.812916987 | 0.901 | 0.236 | 0         | 0         |
| 5 | LGALS7B   | 1.579278324 | 0.996 | 0.513 | 0         | 0         |
| 5 | KRT1      | 1.568828695 | 0.993 | 0.566 | 0         | 0         |
| 5 | SFN       | 1.513497596 | 1     | 0.674 | 0         | 0         |
| 5 | PERP      | 1.508377635 | 1     | 0.7   | 0         | 0         |
| 5 | TMEM45A   | 1.488439962 | 0.849 | 0.275 | 0         | 0         |
| 5 | SPINK5    | 1.436375023 | 0.675 | 0.127 | 0         | 0         |
| 5 | TACSTD2   | 1.396858933 | 0.98  | 0.523 | 0         | 0         |
| 5 | DSP       | 1.386318542 | 0.939 | 0.472 | 0         | 0         |
| 5 | CLDN4     | 1.368638517 | 0.791 | 0.181 | 0         | 0         |
| 5 | CALML3    | 1.312252444 | 0.812 | 0.155 | 0         | 0         |
| 5 | PKP1      | 1.273528712 | 0.837 | 0.219 | 0         | 0         |
| 5 | LY6D      | 1.25628503  | 0.984 | 0.479 | 0         | 0         |
| 5 | SERPINB2  | 1.227742289 | 0.685 | 0.303 | 0         | 0         |
| 5 | DSG1      | 1.213189831 | 0.804 | 0.185 | 0         | 0         |
| 5 | PHLDA2    | 1.195692715 | 0.918 | 0.495 | 0         | 0         |
| 5 | CTNBP1    | 1.190102954 | 0.866 | 0.254 | 0         | 0         |
| 5 | IVL       | 1.152325785 | 0.529 | 0.031 | 0         | 0         |
| 5 | CLDN1     | 1.147142142 | 0.767 | 0.195 | 0         | 0         |
| 5 | DSC1      | 1.122811782 | 0.723 | 0.093 | 0         | 0         |
| 5 | LGALS7    | 1.112582671 | 0.61  | 0.251 | 0         | 0         |
| 5 | KLK11     | 1.085109551 | 0.837 | 0.194 | 0         | 0         |
| 5 | TUBA4A    | 1.067574938 | 0.906 | 0.425 | 0         | 0         |
| 5 | SERPINB5  | 1.063029706 | 0.909 | 0.362 | 0         | 0         |
| 5 | JUP       | 1.061303254 | 0.85  | 0.316 | 0         | 0         |
| 5 | SLPI      | 1.056407018 | 0.731 | 0.161 | 0         | 0         |
| 5 | SERPINA12 | 1.023664391 | 0.405 | 0.032 | 0         | 0         |
| 5 | SCEL      | 1.006779178 | 0.593 | 0.055 | 0         | 0         |
| 5 | S100A14   | 1.003864909 | 0.995 | 0.519 | 0         | 0         |
| 5 | SULT2B1   | 0.971492301 | 0.631 | 0.061 | 0         | 0         |
| 5 | GLTP      | 0.969981176 | 0.795 | 0.235 | 0         | 0         |
| 5 | DAPL1     | 0.969707148 | 0.83  | 0.249 | 0         | 0         |
| 5 | EMP2      | 0.942197265 | 0.876 | 0.551 | 0         | 0         |
| 5 | CLIC3     | 0.939146088 | 0.467 | 0.054 | 0         | 0         |
| 5 | SDC1      | 0.935417808 | 0.756 | 0.211 | 0         | 0         |
| 5 | TRIM29    | 0.92544599  | 0.797 | 0.259 | 0         | 0         |
| 5 | AQP3      | 0.898462333 | 0.964 | 0.528 | 0         | 0         |
| 5 | LGALSL    | 0.883523194 | 0.651 | 0.172 | 0         | 0         |
| 5 | DEFB1     | 0.883003128 | 0.788 | 0.175 | 0         | 0         |
| 5 | RAB25     | 0.881209309 | 0.771 | 0.17  | 0         | 0         |
| 6 | APOD      | 2.614537313 | 0.991 | 0.344 | 0         | 0         |
| 6 | GSN       | 2.539012038 | 1     | 0.732 | 0         | 0         |
| 6 | CFD       | 2.511711285 | 0.993 | 0.463 | 0         | 0         |
| 6 | MGP       | 2.397535339 | 0.998 | 0.472 | 0         | 0         |
| 6 | PLA2G2A   | 2.308252841 | 0.684 | 0.039 | 0         | 0         |
| 6 | CFH       | 1.813943248 | 0.968 | 0.19  | 0         | 0         |
| 6 | IGFBP6    | 1.712808077 | 0.869 | 0.132 | 0         | 0         |
| 6 | C3        | 1.671982173 | 0.904 | 0.086 | 0         | 0         |
| 6 | CCDC80    | 1.564995146 | 0.993 | 0.318 | 0         | 0         |
| 6 | CXCL12    | 1.544201794 | 0.982 | 0.296 | 0         | 0         |
| 6 | DCN       | 1.532661736 | 0.999 | 0.545 | 0         | 0         |

|   |          |             |       |       |   |   |
|---|----------|-------------|-------|-------|---|---|
| 6 | C1S      | 1.431402467 | 0.991 | 0.326 | 0 | 0 |
| 6 | SERPING1 | 1.430603559 | 0.991 | 0.405 | 0 | 0 |
| 6 | SERPINF1 | 1.42298889  | 0.991 | 0.363 | 0 | 0 |
| 6 | C1R      | 1.403035056 | 0.989 | 0.369 | 0 | 0 |
| 6 | CLU      | 1.382381505 | 0.794 | 0.338 | 0 | 0 |
| 6 | GPC3     | 1.370354996 | 0.821 | 0.066 | 0 | 0 |
| 6 | EFEMP1   | 1.344282586 | 0.927 | 0.18  | 0 | 0 |
| 6 | ITM2A    | 1.337364332 | 0.899 | 0.208 | 0 | 0 |
| 6 | CXCL14   | 1.33672075  | 0.973 | 0.755 | 0 | 0 |
| 6 | ADH1B    | 1.307191101 | 0.823 | 0.091 | 0 | 0 |
| 6 | GPX3     | 1.295192276 | 0.747 | 0.166 | 0 | 0 |
| 6 | MYOC     | 1.259592778 | 0.504 | 0.011 | 0 | 0 |
| 6 | FBLN1    | 1.241422468 | 0.972 | 0.286 | 0 | 0 |
| 6 | C7       | 1.199410325 | 0.583 | 0.037 | 0 | 0 |
| 6 | THY1     | 1.15230411  | 0.842 | 0.191 | 0 | 0 |
| 6 | SOD3     | 1.136079722 | 0.982 | 0.375 | 0 | 0 |
| 6 | LUM      | 1.129435238 | 0.968 | 0.282 | 0 | 0 |
| 6 | SRPX     | 1.11429259  | 0.832 | 0.151 | 0 | 0 |
| 6 | TIMP1    | 1.086451851 | 0.952 | 0.574 | 0 | 0 |
| 6 | APOE     | 1.085915822 | 0.888 | 0.654 | 0 | 0 |
| 6 | WISP2    | 1.057708904 | 0.776 | 0.12  | 0 | 0 |
| 6 | MFAP4    | 1.043067205 | 0.919 | 0.252 | 0 | 0 |
| 6 | S100A13  | 1.042319532 | 0.958 | 0.404 | 0 | 0 |
| 6 | NTRK2    | 1.037133333 | 0.825 | 0.174 | 0 | 0 |
| 6 | PLAC9    | 1.030817516 | 0.96  | 0.34  | 0 | 0 |
| 6 | FBLN2    | 1.001417339 | 0.924 | 0.196 | 0 | 0 |
| 6 | COL6A2   | 0.993982017 | 0.998 | 0.486 | 0 | 0 |
| 6 | PCOLCE   | 0.961050395 | 0.95  | 0.298 | 0 | 0 |
| 6 | RARRES2  | 0.960080998 | 0.85  | 0.171 | 0 | 0 |
| 6 | IGFBP3   | 0.947312877 | 0.623 | 0.098 | 0 | 0 |
| 6 | CYGB     | 0.94550351  | 0.765 | 0.118 | 0 | 0 |
| 6 | LGALS3BP | 0.943755045 | 0.838 | 0.192 | 0 | 0 |
| 6 | IGFBP4   | 0.933009435 | 0.947 | 0.466 | 0 | 0 |
| 6 | MFAP5    | 0.928073927 | 0.705 | 0.099 | 0 | 0 |
| 6 | LSP1     | 0.926165522 | 0.87  | 0.272 | 0 | 0 |
| 6 | MGST1    | 0.920467035 | 0.739 | 0.109 | 0 | 0 |
| 6 | SPON2    | 0.917740924 | 0.674 | 0.15  | 0 | 0 |
| 6 | VIM      | 0.907827263 | 1     | 0.701 | 0 | 0 |
| 6 | SELENOP  | 0.888907996 | 0.963 | 0.622 | 0 | 0 |
| 7 | CCL19    | 2.507691313 | 0.567 | 0.034 | 0 | 0 |
| 7 | CXCL12   | 2.334091646 | 0.993 | 0.296 | 0 | 0 |
| 7 | PTGDS    | 2.232090718 | 0.937 | 0.24  | 0 | 0 |
| 7 | APOE     | 2.048365704 | 0.928 | 0.652 | 0 | 0 |
| 7 | C1S      | 1.607610573 | 0.985 | 0.326 | 0 | 0 |
| 7 | CXCL14   | 1.579777225 | 0.984 | 0.755 | 0 | 0 |
| 7 | CFH      | 1.495749474 | 0.953 | 0.191 | 0 | 0 |
| 7 | C3       | 1.489182989 | 0.783 | 0.092 | 0 | 0 |
| 7 | CCDC80   | 1.470283806 | 0.983 | 0.319 | 0 | 0 |
| 7 | CFD      | 1.455575829 | 0.989 | 0.463 | 0 | 0 |
| 7 | C1R      | 1.432962358 | 0.981 | 0.37  | 0 | 0 |
| 7 | SERPING1 | 1.384295289 | 0.985 | 0.405 | 0 | 0 |
| 7 | APOD     | 1.369861474 | 0.982 | 0.344 | 0 | 0 |
| 7 | DCN      | 1.363335456 | 1     | 0.545 | 0 | 0 |
| 7 | IGFBP7   | 1.337845763 | 0.999 | 0.634 | 0 | 0 |
| 7 | SERPINF1 | 1.308734084 | 0.979 | 0.364 | 0 | 0 |
| 7 | SOD3     | 1.287018272 | 0.97  | 0.376 | 0 | 0 |
| 7 | MGP      | 1.244209756 | 0.961 | 0.474 | 0 | 0 |
| 7 | PTN      | 1.17448257  | 0.759 | 0.125 | 0 | 0 |
| 7 | FBLN1    | 1.17190776  | 0.917 | 0.288 | 0 | 0 |
| 7 | RARRES2  | 1.111630039 | 0.848 | 0.171 | 0 | 0 |
| 7 | GSN      | 1.084768677 | 0.993 | 0.732 | 0 | 0 |
| 7 | COL6A2   | 1.081735947 | 0.991 | 0.487 | 0 | 0 |
| 7 | THY1     | 1.052103328 | 0.836 | 0.191 | 0 | 0 |
| 7 | TIMP1    | 1.048359734 | 0.979 | 0.573 | 0 | 0 |

|   |          |             |       |       |   |   |
|---|----------|-------------|-------|-------|---|---|
| 7 | CST3     | 1.034273139 | 1     | 0.789 | 0 | 0 |
| 7 | NNMT     | 1.024829112 | 0.871 | 0.262 | 0 | 0 |
| 7 | DPT      | 1.017026355 | 0.84  | 0.148 | 0 | 0 |
| 7 | SFRP2    | 1.012795398 | 0.774 | 0.143 | 0 | 0 |
| 7 | VCAN     | 1.01036942  | 0.807 | 0.135 | 0 | 0 |
| 7 | S100A13  | 1.000288656 | 0.931 | 0.405 | 0 | 0 |
| 7 | PCOLCE   | 0.997206945 | 0.944 | 0.298 | 0 | 0 |
| 7 | C7       | 0.97438554  | 0.403 | 0.045 | 0 | 0 |
| 7 | CLU      | 0.937947947 | 0.741 | 0.341 | 0 | 0 |
| 7 | ADH1B    | 0.932767231 | 0.671 | 0.098 | 0 | 0 |
| 7 | EFEMP1   | 0.927545422 | 0.799 | 0.186 | 0 | 0 |
| 7 | TMEM176B | 0.925167124 | 0.792 | 0.131 | 0 | 0 |
| 7 | CTSK     | 0.897020961 | 0.91  | 0.188 | 0 | 0 |
| 7 | SELENOM  | 0.896786523 | 0.957 | 0.469 | 0 | 0 |
| 7 | IL11RA   | 0.894212166 | 0.756 | 0.132 | 0 | 0 |
| 7 | CYGB     | 0.886259352 | 0.654 | 0.123 | 0 | 0 |
| 7 | MFAP4    | 0.884217527 | 0.838 | 0.256 | 0 | 0 |
| 7 | PLAC9    | 0.877946022 | 0.935 | 0.342 | 0 | 0 |
| 7 | PLPP3    | 0.860803234 | 0.812 | 0.227 | 0 | 0 |
| 7 | S100A6   | 0.85745797  | 1     | 0.82  | 0 | 0 |
| 7 | VIM      | 0.844200461 | 1     | 0.701 | 0 | 0 |
| 7 | FBLN2    | 0.823003212 | 0.864 | 0.199 | 0 | 0 |
| 7 | IFITM3   | 0.822635588 | 0.998 | 0.752 | 0 | 0 |
| 7 | MEG3     | 0.808328762 | 0.716 | 0.166 | 0 | 0 |
| 7 | COL6A1   | 0.802259016 | 0.964 | 0.416 | 0 | 0 |
| 8 | KRT14    | 2.375096239 | 1     | 0.661 | 0 | 0 |
| 8 | KRT5     | 2.040354148 | 1     | 0.476 | 0 | 0 |
| 8 | S100A2   | 1.654312808 | 0.989 | 0.363 | 0 | 0 |
| 8 | COL17A1  | 1.458361408 | 0.919 | 0.122 | 0 | 0 |
| 8 | DST      | 1.347181476 | 0.908 | 0.311 | 0 | 0 |
| 8 | HOPX     | 0.965809482 | 0.94  | 0.368 | 0 | 0 |
| 8 | AQP3     | 0.938553774 | 0.99  | 0.528 | 0 | 0 |
| 8 | SYT8     | 0.853538014 | 0.644 | 0.075 | 0 | 0 |
| 8 | KRT15    | 0.840467058 | 0.762 | 0.163 | 0 | 0 |
| 8 | SOX15    | 0.800020666 | 0.834 | 0.254 | 0 | 0 |
| 8 | FAM213A  | 0.780140503 | 0.822 | 0.261 | 0 | 0 |
| 8 | MT1X     | 0.766107775 | 0.944 | 0.744 | 0 | 0 |
| 8 | AREG     | 0.76529134  | 0.556 | 0.201 | 0 | 0 |
| 8 | KLF5     | 0.757706213 | 0.919 | 0.467 | 0 | 0 |
| 8 | SERPINB2 | 0.726692805 | 0.668 | 0.305 | 0 | 0 |
| 8 | ERRFI1   | 0.715454694 | 0.669 | 0.271 | 0 | 0 |
| 8 | PERP     | 0.696101194 | 0.999 | 0.701 | 0 | 0 |
| 8 | CCL27    | 0.695638618 | 0.612 | 0.221 | 0 | 0 |
| 8 | TGFBI    | 0.688142229 | 0.749 | 0.264 | 0 | 0 |
| 8 | ATP1B3   | 0.684333545 | 0.959 | 0.633 | 0 | 0 |
| 8 | IMPA2    | 0.668638142 | 0.786 | 0.232 | 0 | 0 |
| 8 | FBXW7    | 0.666910118 | 0.743 | 0.229 | 0 | 0 |
| 8 | SPINT2   | 0.658155373 | 0.898 | 0.377 | 0 | 0 |
| 8 | SFN      | 0.657792876 | 1     | 0.675 | 0 | 0 |
| 8 | IL18     | 0.630106234 | 0.696 | 0.186 | 0 | 0 |
| 8 | C19orf33 | 0.627270562 | 0.833 | 0.328 | 0 | 0 |
| 8 | PDLIM1   | 0.615374936 | 0.864 | 0.459 | 0 | 0 |
| 8 | CXADR    | 0.606417677 | 0.749 | 0.232 | 0 | 0 |
| 8 | FGFBP1   | 0.605953853 | 0.527 | 0.175 | 0 | 0 |
| 8 | ADRB2    | 0.60087999  | 0.647 | 0.232 | 0 | 0 |
| 8 | PKM      | 0.598072332 | 0.969 | 0.814 | 0 | 0 |
| 8 | CBR1     | 0.588971488 | 0.775 | 0.347 | 0 | 0 |
| 8 | TOB1     | 0.583794437 | 0.774 | 0.43  | 0 | 0 |
| 8 | FXYD3    | 0.577326421 | 0.952 | 0.47  | 0 | 0 |
| 8 | LGALS7   | 0.574149569 | 0.748 | 0.246 | 0 | 0 |
| 8 | ALDH3A1  | 0.572260663 | 0.533 | 0.109 | 0 | 0 |
| 8 | HSPA2    | 0.571973537 | 0.765 | 0.358 | 0 | 0 |
| 8 | NDFIP2   | 0.535845035 | 0.723 | 0.235 | 0 | 0 |
| 8 | FGFR3    | 0.531755184 | 0.64  | 0.153 | 0 | 0 |

|    |          |             |       |       |           |           |
|----|----------|-------------|-------|-------|-----------|-----------|
| 8  | ARL4A    | 0.531378004 | 0.667 | 0.281 | 0         | 0         |
| 8  | CXCL14   | 0.528882483 | 0.994 | 0.755 | 0         | 0         |
| 8  | PMAIP1   | 0.526170325 | 0.687 | 0.278 | 0         | 0         |
| 8  | S100A14  | 0.524080391 | 0.948 | 0.523 | 0         | 0         |
| 8  | DEGS1    | 0.522327871 | 0.864 | 0.496 | 0         | 0         |
| 8  | SERPINB5 | 0.51985538  | 0.842 | 0.367 | 0         | 0         |
| 8  | DUSP14   | 0.518619233 | 0.586 | 0.186 | 0         | 0         |
| 8  | DNAJA1   | 0.631091106 | 0.919 | 0.826 | 9.88E-275 | 2.35E-270 |
| 8  | HSP90AA1 | 0.54331514  | 0.991 | 0.97  | 5.92E-248 | 1.41E-243 |
| 8  | MT1E     | 0.531942493 | 0.736 | 0.458 | 9.82E-236 | 2.34E-231 |
| 8  | CKS2     | 0.526633232 | 0.695 | 0.455 | 1.35E-209 | 3.20E-205 |
| 9  | PTGDS    | 2.629427691 | 0.974 | 0.239 | 0         | 0         |
| 9  | SFRP2    | 2.555105522 | 0.965 | 0.136 | 0         | 0         |
| 9  | COL1A1   | 2.48125612  | 1     | 0.472 | 0         | 0         |
| 9  | COL3A1   | 2.329857121 | 0.996 | 0.373 | 0         | 0         |
| 9  | COL1A2   | 2.311622744 | 1     | 0.46  | 0         | 0         |
| 9  | COMP     | 2.224628281 | 0.709 | 0.061 | 0         | 0         |
| 9  | COL6A1   | 2.150439892 | 1     | 0.415 | 0         | 0         |
| 9  | COL6A2   | 1.989768633 | 1     | 0.487 | 0         | 0         |
| 9  | SPARC    | 1.828772992 | 0.998 | 0.584 | 0         | 0         |
| 9  | MMP2     | 1.770070909 | 0.974 | 0.23  | 0         | 0         |
| 9  | DCN      | 1.659366902 | 0.991 | 0.546 | 0         | 0         |
| 9  | CTSK     | 1.553272495 | 0.934 | 0.188 | 0         | 0         |
| 9  | IGFBP4   | 1.540056401 | 0.958 | 0.466 | 0         | 0         |
| 9  | APCDD1   | 1.42788231  | 0.82  | 0.169 | 0         | 0         |
| 9  | LGALS1   | 1.395256356 | 1     | 0.661 | 0         | 0         |
| 9  | HTRA1    | 1.389253643 | 0.945 | 0.253 | 0         | 0         |
| 9  | PCOLCE   | 1.388159875 | 0.961 | 0.299 | 0         | 0         |
| 9  | ELN      | 1.370653924 | 0.841 | 0.14  | 0         | 0         |
| 9  | CTHRC1   | 1.35371438  | 0.812 | 0.159 | 0         | 0         |
| 9  | TWIST2   | 1.340799482 | 0.902 | 0.125 | 0         | 0         |
| 9  | C1R      | 1.339071515 | 0.968 | 0.371 | 0         | 0         |
| 9  | FBLN1    | 1.316650221 | 0.87  | 0.291 | 0         | 0         |
| 9  | COL6A3   | 1.289819184 | 0.915 | 0.186 | 0         | 0         |
| 9  | NBL1     | 1.275428299 | 0.899 | 0.529 | 0         | 0         |
| 9  | SERPINF1 | 1.248713716 | 0.962 | 0.366 | 0         | 0         |
| 9  | C1S      | 1.239758414 | 0.966 | 0.328 | 0         | 0         |
| 9  | WISP2    | 1.232369238 | 0.666 | 0.126 | 0         | 0         |
| 9  | POSTN    | 1.22728652  | 0.57  | 0.196 | 0         | 0         |
| 9  | LUM      | 1.210869944 | 0.891 | 0.286 | 0         | 0         |
| 9  | COL5A1   | 1.202207001 | 0.86  | 0.108 | 0         | 0         |
| 9  | MFAP4    | 1.194144903 | 0.915 | 0.254 | 0         | 0         |
| 9  | AEBP1    | 1.191232194 | 0.919 | 0.224 | 0         | 0         |
| 9  | FBLN2    | 1.175450645 | 0.92  | 0.197 | 0         | 0         |
| 9  | S100A6   | 1.167292614 | 1     | 0.82  | 0         | 0         |
| 9  | MEG3     | 1.165047457 | 0.905 | 0.158 | 0         | 0         |
| 9  | FSTL1    | 1.164323538 | 0.906 | 0.241 | 0         | 0         |
| 9  | TIMP2    | 1.154324068 | 0.924 | 0.264 | 0         | 0         |
| 9  | PTN      | 1.152287521 | 0.743 | 0.127 | 0         | 0         |
| 9  | THBS2    | 1.146794273 | 0.832 | 0.139 | 0         | 0         |
| 9  | STC2     | 1.131037201 | 0.568 | 0.037 | 0         | 0         |
| 9  | MXRA8    | 1.123466812 | 0.877 | 0.185 | 0         | 0         |
| 9  | PLPP3    | 1.112605914 | 0.846 | 0.226 | 0         | 0         |
| 9  | CLEC11A  | 1.099573289 | 0.834 | 0.163 | 0         | 0         |
| 9  | MMP11    | 1.085912139 | 0.416 | 0.033 | 0         | 0         |
| 9  | CXCL14   | 1.041623459 | 0.969 | 0.756 | 0         | 0         |
| 9  | SOD3     | 1.034971903 | 0.943 | 0.378 | 0         | 0         |
| 9  | PPIC     | 1.030697558 | 0.864 | 0.234 | 0         | 0         |
| 9  | CFD      | 1.028088832 | 0.896 | 0.468 | 0         | 0         |
| 9  | TIMP1    | 1.025606524 | 0.992 | 0.573 | 0         | 0         |
| 9  | THY1     | 1.020223032 | 0.842 | 0.192 | 0         | 0         |
| 10 | S100A14  | 1.066249857 | 0.994 | 0.523 | 0         | 0         |
| 10 | DMKN     | 1.060263314 | 0.996 | 0.599 | 0         | 0         |
| 10 | LY6D     | 1.048729284 | 0.991 | 0.483 | 0         | 0         |

|    |          |             |       |       |           |           |
|----|----------|-------------|-------|-------|-----------|-----------|
| 10 | MT1X     | 0.988720023 | 0.986 | 0.743 | 0         | 0         |
| 10 | SFN      | 0.937523076 | 1     | 0.677 | 0         | 0         |
| 10 | KRT5     | 0.913997598 | 0.89  | 0.483 | 0         | 0         |
| 10 | KRT1     | 0.908361771 | 0.987 | 0.57  | 0         | 0         |
| 10 | LGALS7B  | 0.86883037  | 0.976 | 0.518 | 0         | 0         |
| 10 | KRT10    | 0.818181832 | 0.996 | 0.85  | 0         | 0         |
| 10 | DSP      | 0.814236169 | 0.971 | 0.474 | 0         | 0         |
| 10 | PERP     | 0.806948795 | 1     | 0.702 | 0         | 0         |
| 10 | AQP3     | 0.71593941  | 0.982 | 0.531 | 0         | 0         |
| 10 | DSC3     | 0.692882839 | 0.884 | 0.343 | 0         | 0         |
| 10 | RPLP1    | 0.673184117 | 1     | 1     | 0         | 0         |
| 10 | LGALS7   | 0.654505775 | 0.608 | 0.254 | 0         | 0         |
| 10 | TACSTD2  | 0.641848983 | 0.941 | 0.528 | 0         | 0         |
| 10 | KLF5     | 0.640710829 | 0.93  | 0.469 | 0         | 0         |
| 10 | LYPD3    | 0.624847274 | 0.913 | 0.443 | 0         | 0         |
| 10 | SOX15    | 0.599384526 | 0.765 | 0.26  | 0         | 0         |
| 10 | RPS19    | 0.573820201 | 1     | 1     | 0         | 0         |
| 10 | RPLP0    | 0.572627518 | 1     | 0.999 | 0         | 0         |
| 10 | RPS18    | 0.572279228 | 1     | 1     | 0         | 0         |
| 10 | FXYD3    | 0.567855769 | 0.943 | 0.473 | 0         | 0         |
| 10 | SERPINB2 | 0.562373134 | 0.716 | 0.305 | 0         | 0         |
| 10 | RHOV     | 0.554689266 | 0.678 | 0.178 | 0         | 0         |
| 10 | RPS2     | 0.539921847 | 1     | 1     | 0         | 0         |
| 10 | SERPINB5 | 0.52870134  | 0.838 | 0.369 | 0         | 0         |
| 10 | EEF1B2   | 0.520377455 | 0.992 | 0.957 | 0         | 0         |
| 10 | RPS8     | 0.516306785 | 1     | 1     | 0         | 0         |
| 10 | RPS7     | 0.506782289 | 1     | 0.999 | 0         | 0         |
| 10 | CCL27    | 0.504616366 | 0.656 | 0.221 | 0         | 0         |
| 10 | HMGA1    | 0.502399775 | 0.713 | 0.291 | 0         | 0         |
| 10 | RPL18    | 0.497467364 | 1     | 0.999 | 0         | 0         |
| 10 | IRF6     | 0.491613218 | 0.665 | 0.224 | 0         | 0         |
| 10 | TRIM29   | 0.489777312 | 0.767 | 0.264 | 0         | 0         |
| 10 | PKP1     | 0.488449346 | 0.75  | 0.227 | 0         | 0         |
| 10 | MT1G     | 0.483408695 | 0.443 | 0.09  | 0         | 0         |
| 10 | RPL7A    | 0.475407704 | 1     | 0.999 | 0         | 0         |
| 10 | RPS12    | 0.472965466 | 1     | 1     | 0         | 0         |
| 10 | RPS3A    | 0.467355374 | 1     | 0.999 | 0         | 0         |
| 10 | RPS6     | 0.464357725 | 1     | 1     | 0         | 0         |
| 10 | TENT5B   | 0.464321841 | 0.618 | 0.22  | 0         | 0         |
| 10 | DEFB1    | 0.461888849 | 0.665 | 0.184 | 0         | 0         |
| 10 | FGFBP1   | 0.460817878 | 0.515 | 0.178 | 0         | 0         |
| 10 | RPL18A   | 0.460618958 | 1     | 1     | 0         | 0         |
| 10 | RPL10A   | 0.459807332 | 1     | 0.999 | 0         | 0         |
| 10 | RPS10    | 0.457020158 | 1     | 0.994 | 0         | 0         |
| 10 | PHLDA2   | 0.607423604 | 0.825 | 0.501 | 1.68E-302 | 4.00E-298 |
| 10 | KRT14    | 0.619586842 | 0.884 | 0.668 | 1.65E-289 | 3.94E-285 |
| 10 | MYC      | 0.479811543 | 0.904 | 0.697 | 7.37E-215 | 1.75E-210 |
| 11 | KRT1     | 2.029778588 | 0.999 | 0.571 | 0         | 0         |
| 11 | KRT10    | 1.804417889 | 1     | 0.85  | 0         | 0         |
| 11 | DMKN     | 1.663715507 | 1     | 0.6   | 0         | 0         |
| 11 | LY6D     | 1.339929858 | 0.997 | 0.484 | 0         | 0         |
| 11 | KRTDAP   | 1.328774567 | 0.976 | 0.427 | 0         | 0         |
| 11 | LGALS7B  | 1.324971796 | 0.995 | 0.519 | 0         | 0         |
| 11 | PERP     | 1.200354399 | 0.999 | 0.703 | 0         | 0         |
| 11 | LGALS7   | 1.194203878 | 0.776 | 0.25  | 0         | 0         |
| 11 | DSP      | 1.060472113 | 0.963 | 0.476 | 0         | 0         |
| 11 | MT1X     | 0.929056627 | 0.982 | 0.744 | 0         | 0         |
| 11 | DEGS1    | 0.898081254 | 0.947 | 0.496 | 0         | 0         |
| 11 | PKP1     | 0.894292202 | 0.852 | 0.226 | 0         | 0         |
| 11 | DEFB1    | 0.838437711 | 0.827 | 0.18  | 0         | 0         |
| 11 | JUP      | 0.811171627 | 0.896 | 0.321 | 0         | 0         |
| 11 | FXYD3    | 0.810294598 | 0.962 | 0.474 | 0         | 0         |
| 11 | DSC3     | 0.807109193 | 0.91  | 0.344 | 0         | 0         |
| 11 | S100A14  | 0.795939223 | 0.991 | 0.525 | 0         | 0         |

|    |          |             |       |       |           |           |
|----|----------|-------------|-------|-------|-----------|-----------|
| 11 | CCL27    | 0.761132674 | 0.807 | 0.217 | 0         | 0         |
| 11 | DSG1     | 0.735209206 | 0.814 | 0.192 | 0         | 0         |
| 11 | SFN      | 0.730300749 | 0.999 | 0.678 | 0         | 0         |
| 11 | RHOV     | 0.728413346 | 0.743 | 0.177 | 0         | 0         |
| 11 | AQP3     | 0.680475411 | 0.981 | 0.533 | 0         | 0         |
| 11 | NSG1     | 0.67564105  | 0.775 | 0.189 | 0         | 0         |
| 11 | TRIM29   | 0.667559919 | 0.813 | 0.264 | 0         | 0         |
| 11 | CTNNBIP1 | 0.647208236 | 0.8   | 0.263 | 0         | 0         |
| 11 | KLK11    | 0.644563686 | 0.766 | 0.203 | 0         | 0         |
| 11 | RPS18    | 0.632972912 | 1     | 1     | 0         | 0         |
| 11 | CCND1    | 0.62938388  | 0.797 | 0.407 | 0         | 0         |
| 11 | CSTA     | 0.61202543  | 0.807 | 0.247 | 0         | 0         |
| 11 | GJA1     | 0.611790353 | 0.793 | 0.352 | 0         | 0         |
| 11 | KCNK7    | 0.604066033 | 0.675 | 0.121 | 0         | 0         |
| 11 | SBSN     | 0.603247573 | 0.882 | 0.276 | 0         | 0         |
| 11 | S100A16  | 0.591935888 | 0.922 | 0.591 | 0         | 0         |
| 11 | KRT2     | 0.585579314 | 0.757 | 0.316 | 0         | 0         |
| 11 | RPLP1    | 0.580549212 | 1     | 1     | 0         | 0         |
| 11 | ALDH2    | 0.579592969 | 0.797 | 0.413 | 0         | 0         |
| 11 | CHP2     | 0.575583264 | 0.599 | 0.077 | 0         | 0         |
| 11 | C19orf33 | 0.568016069 | 0.781 | 0.334 | 0         | 0         |
| 11 | SDC1     | 0.567212312 | 0.723 | 0.219 | 0         | 0         |
| 11 | GATA3    | 0.560667701 | 0.644 | 0.156 | 0         | 0         |
| 11 | DAPL1    | 0.553448647 | 0.768 | 0.258 | 0         | 0         |
| 11 | PKP3     | 0.55118319  | 0.732 | 0.22  | 0         | 0         |
| 11 | RAB25    | 0.550940989 | 0.686 | 0.18  | 0         | 0         |
| 11 | DBI      | 0.550277307 | 0.96  | 0.747 | 0         | 0         |
| 11 | RPS19    | 0.54338758  | 1     | 1     | 0         | 0         |
| 11 | NUPR1    | 0.542437505 | 0.937 | 0.677 | 0         | 0         |
| 11 | OVOL1    | 0.514405259 | 0.558 | 0.177 | 0         | 0         |
| 11 | GLTP     | 0.513449961 | 0.706 | 0.245 | 0         | 0         |
| 11 | GATM     | 0.513269284 | 0.591 | 0.146 | 0         | 0         |
| 11 | HES1     | 0.578920734 | 0.809 | 0.594 | 1.48E-167 | 3.52E-163 |
| 12 | SELE     | 2.812319037 | 0.881 | 0.023 | 0         | 0         |
| 12 | ACKR1    | 2.695230967 | 0.952 | 0.046 | 0         | 0         |
| 12 | TM4SF1   | 2.667600623 | 0.999 | 0.274 | 0         | 0         |
| 12 | IL6      | 2.417747032 | 0.871 | 0.114 | 0         | 0         |
| 12 | AQP1     | 1.831170847 | 0.987 | 0.178 | 0         | 0         |
| 12 | IFI27    | 1.768969797 | 0.999 | 0.461 | 0         | 0         |
| 12 | PLVAP    | 1.748141838 | 0.971 | 0.056 | 0         | 0         |
| 12 | SPARCL1  | 1.620922136 | 0.995 | 0.331 | 0         | 0         |
| 12 | C2CD4B   | 1.612474323 | 0.799 | 0.027 | 0         | 0         |
| 12 | G0S2     | 1.527314278 | 0.545 | 0.079 | 0         | 0         |
| 12 | CD74     | 1.519176373 | 0.995 | 0.354 | 0         | 0         |
| 12 | PECAM1   | 1.446149513 | 0.946 | 0.072 | 0         | 0         |
| 12 | ICAM1    | 1.386324292 | 0.916 | 0.181 | 0         | 0         |
| 12 | GNG11    | 1.360813885 | 0.975 | 0.246 | 0         | 0         |
| 12 | PCAT19   | 1.351234555 | 0.923 | 0.055 | 0         | 0         |
| 12 | NPDC1    | 1.341677909 | 0.93  | 0.166 | 0         | 0         |
| 12 | RCAN1    | 1.323538247 | 0.83  | 0.119 | 0         | 0         |
| 12 | SOCS3    | 1.286422556 | 0.922 | 0.589 | 0         | 0         |
| 12 | STC1     | 1.27971246  | 0.487 | 0.016 | 0         | 0         |
| 12 | CLDN5    | 1.27901333  | 0.83  | 0.067 | 0         | 0         |
| 12 | CSF3     | 1.275658199 | 0.6   | 0.01  | 0         | 0         |
| 12 | RAMP2    | 1.2707616   | 0.922 | 0.12  | 0         | 0         |
| 12 | LMCD1    | 1.269314431 | 0.896 | 0.124 | 0         | 0         |
| 12 | VWF      | 1.249534866 | 0.877 | 0.057 | 0         | 0         |
| 12 | RAMP3    | 1.2441465   | 0.862 | 0.055 | 0         | 0         |
| 12 | TMEM70   | 1.238345912 | 0.825 | 0.176 | 0         | 0         |
| 12 | TSC22D1  | 1.235999099 | 0.882 | 0.519 | 0         | 0         |
| 12 | HLA-DRB1 | 1.215394482 | 0.982 | 0.182 | 0         | 0         |
| 12 | HLA-E    | 1.210661379 | 0.999 | 0.88  | 0         | 0         |
| 12 | ECSCR    | 1.196672607 | 0.895 | 0.059 | 0         | 0         |
| 12 | ADGRL4   | 1.161329784 | 0.896 | 0.05  | 0         | 0         |

|    |          |             |       |       |   |   |
|----|----------|-------------|-------|-------|---|---|
| 12 | ADAMTS9  | 1.149783406 | 0.757 | 0.058 | 0 | 0 |
| 12 | IFIT1    | 1.149399189 | 0.572 | 0.06  | 0 | 0 |
| 12 | CCL14    | 1.131431489 | 0.791 | 0.033 | 0 | 0 |
| 12 | BCAM     | 1.128591951 | 0.951 | 0.189 | 0 | 0 |
| 12 | A2M      | 1.119518108 | 0.91  | 0.176 | 0 | 0 |
| 12 | NFKBIA   | 1.117502763 | 0.998 | 0.889 | 0 | 0 |
| 12 | RND1     | 1.116409627 | 0.77  | 0.057 | 0 | 0 |
| 12 | PDLIM1   | 1.115542841 | 0.955 | 0.46  | 0 | 0 |
| 12 | ENG      | 1.112888142 | 0.872 | 0.133 | 0 | 0 |
| 12 | CAV1     | 1.111128591 | 0.981 | 0.649 | 0 | 0 |
| 12 | SDCBP    | 1.103003995 | 0.976 | 0.536 | 0 | 0 |
| 12 | EMCN     | 1.089663483 | 0.877 | 0.081 | 0 | 0 |
| 12 | CLU      | 1.083455382 | 0.873 | 0.341 | 0 | 0 |
| 12 | CTGF     | 1.067192071 | 0.787 | 0.25  | 0 | 0 |
| 12 | SOX17    | 1.066554659 | 0.608 | 0.029 | 0 | 0 |
| 12 | ADAMTS1  | 1.050866311 | 0.804 | 0.229 | 0 | 0 |
| 12 | CNKS3    | 1.037758288 | 0.74  | 0.059 | 0 | 0 |
| 12 | SPRY1    | 1.028365933 | 0.765 | 0.226 | 0 | 0 |
| 12 | TSPAN7   | 1.020908686 | 0.825 | 0.052 | 0 | 0 |
| 13 | ACTA2    | 2.677973679 | 0.999 | 0.165 | 0 | 0 |
| 13 | TAGLN    | 2.538114748 | 1     | 0.278 | 0 | 0 |
| 13 | MYL9     | 2.302821611 | 1     | 0.446 | 0 | 0 |
| 13 | ADIRF    | 2.111703558 | 1     | 0.624 | 0 | 0 |
| 13 | TPM2     | 2.105591867 | 0.994 | 0.209 | 0 | 0 |
| 13 | RERGL    | 1.931366368 | 0.887 | 0.028 | 0 | 0 |
| 13 | DSTN     | 1.767856407 | 0.999 | 0.916 | 0 | 0 |
| 13 | PLN      | 1.766352482 | 0.878 | 0.038 | 0 | 0 |
| 13 | MYH11    | 1.711271485 | 0.926 | 0.06  | 0 | 0 |
| 13 | SNCG     | 1.494481991 | 0.836 | 0.122 | 0 | 0 |
| 13 | BCAM     | 1.445275244 | 0.935 | 0.191 | 0 | 0 |
| 13 | PPP1R14A | 1.378551821 | 0.827 | 0.092 | 0 | 0 |
| 13 | SPARCL1  | 1.372888246 | 0.971 | 0.333 | 0 | 0 |
| 13 | TPM1     | 1.348917088 | 0.923 | 0.34  | 0 | 0 |
| 13 | SORBS2   | 1.344946262 | 0.823 | 0.069 | 0 | 0 |
| 13 | GADD45B  | 1.335851144 | 0.934 | 0.712 | 0 | 0 |
| 13 | CSRP1    | 1.286998046 | 0.85  | 0.246 | 0 | 0 |
| 13 | CALD1    | 1.246896193 | 0.984 | 0.57  | 0 | 0 |
| 13 | LBH      | 1.241922578 | 0.865 | 0.177 | 0 | 0 |
| 13 | MFGE8    | 1.24041151  | 0.93  | 0.351 | 0 | 0 |
| 13 | RGS16    | 1.23993407  | 0.696 | 0.306 | 0 | 0 |
| 13 | TINAGL1  | 1.228376884 | 0.897 | 0.137 | 0 | 0 |
| 13 | IGFBP7   | 1.228296227 | 1     | 0.639 | 0 | 0 |
| 13 | CRIP1    | 1.171769931 | 0.948 | 0.577 | 0 | 0 |
| 13 | IGFBP5   | 1.146784596 | 0.869 | 0.223 | 0 | 0 |
| 13 | NET1     | 1.136210466 | 0.78  | 0.157 | 0 | 0 |
| 13 | C11orf96 | 1.097472934 | 0.828 | 0.178 | 0 | 0 |
| 13 | CNN1     | 1.090852443 | 0.71  | 0.046 | 0 | 0 |
| 13 | S100A4   | 1.079755405 | 0.993 | 0.668 | 0 | 0 |
| 13 | FLNA     | 1.058021775 | 0.869 | 0.35  | 0 | 0 |
| 13 | SOD3     | 1.045863808 | 0.957 | 0.384 | 0 | 0 |
| 13 | CAVIN3   | 1.017434031 | 0.886 | 0.334 | 0 | 0 |
| 13 | MCAM     | 1.001000036 | 0.773 | 0.106 | 0 | 0 |
| 13 | ACTB     | 0.990930998 | 1     | 0.995 | 0 | 0 |
| 13 | SELENOM  | 0.985484634 | 0.932 | 0.476 | 0 | 0 |
| 13 | CCDC3    | 0.980460796 | 0.795 | 0.218 | 0 | 0 |
| 13 | NDUFA4   | 0.960174897 | 0.987 | 0.874 | 0 | 0 |
| 13 | CPE      | 0.939156551 | 0.895 | 0.239 | 0 | 0 |
| 13 | CSRP2    | 0.91080527  | 0.73  | 0.203 | 0 | 0 |
| 13 | CD151    | 0.904155931 | 0.846 | 0.43  | 0 | 0 |
| 13 | SH3BGRL  | 0.902017669 | 0.893 | 0.494 | 0 | 0 |
| 13 | LMOD1    | 0.893156336 | 0.689 | 0.065 | 0 | 0 |
| 13 | MYLK     | 0.858403181 | 0.806 | 0.13  | 0 | 0 |
| 13 | TSC22D1  | 0.856114774 | 0.896 | 0.519 | 0 | 0 |
| 13 | CLU      | 0.853865301 | 0.838 | 0.343 | 0 | 0 |

|    |          |             |       |       |           |           |
|----|----------|-------------|-------|-------|-----------|-----------|
| 13 | RRAD     | 0.852377648 | 0.604 | 0.084 | 0         | 0         |
| 13 | VIM      | 0.837564406 | 1     | 0.705 | 0         | 0         |
| 13 | JUN      | 1.065365015 | 0.955 | 0.858 | 4.29E-269 | 1.02E-264 |
| 13 | ATF3     | 0.990393482 | 0.741 | 0.554 | 1.66E-197 | 3.94E-193 |
| 13 | JUNB     | 0.923130375 | 0.981 | 0.961 | 8.69E-192 | 2.07E-187 |
| 14 | CCL3     | 3.057109268 | 0.7   | 0.026 | 0         | 0         |
| 14 | CXCL8    | 2.776400337 | 0.789 | 0.087 | 0         | 0         |
| 14 | RNASE1   | 2.731065487 | 0.852 | 0.085 | 0         | 0         |
| 14 | C1QA     | 2.517137573 | 0.902 | 0.016 | 0         | 0         |
| 14 | CXCL3    | 2.493605157 | 0.768 | 0.12  | 0         | 0         |
| 14 | CCL4     | 2.434860484 | 0.603 | 0.027 | 0         | 0         |
| 14 | FTL      | 2.350482026 | 1     | 0.97  | 0         | 0         |
| 14 | CXCL2    | 2.162086665 | 0.815 | 0.191 | 0         | 0         |
| 14 | CCL3L1   | 2.124775588 | 0.497 | 0.014 | 0         | 0         |
| 14 | TYROBP   | 2.081390253 | 0.921 | 0.052 | 0         | 0         |
| 14 | C1QB     | 1.971016476 | 0.794 | 0.01  | 0         | 0         |
| 14 | HLA-DRA  | 1.919475946 | 0.954 | 0.221 | 0         | 0         |
| 14 | IL1B     | 1.873075916 | 0.523 | 0.031 | 0         | 0         |
| 14 | C1QC     | 1.852305037 | 0.8   | 0.01  | 0         | 0         |
| 14 | GPR183   | 1.815653312 | 0.725 | 0.071 | 0         | 0         |
| 14 | AIF1     | 1.774469156 | 0.858 | 0.036 | 0         | 0         |
| 14 | SELENOP  | 1.743480639 | 0.951 | 0.627 | 0         | 0         |
| 14 | CCL4L2   | 1.712372876 | 0.381 | 0.015 | 0         | 0         |
| 14 | HMOX1    | 1.701518871 | 0.6   | 0.052 | 0         | 0         |
| 14 | PLAUR    | 1.652951738 | 0.745 | 0.19  | 0         | 0         |
| 14 | INSIG1   | 1.625769762 | 0.741 | 0.216 | 0         | 0         |
| 14 | CXCL1    | 1.561510962 | 0.396 | 0.064 | 0         | 0         |
| 14 | CCL13    | 1.520455703 | 0.418 | 0.012 | 0         | 0         |
| 14 | MMP9     | 1.518062975 | 0.541 | 0.022 | 0         | 0         |
| 14 | F13A1    | 1.512589758 | 0.675 | 0.042 | 0         | 0         |
| 14 | SRGN     | 1.5080004   | 0.849 | 0.176 | 0         | 0         |
| 14 | FCER1G   | 1.499377262 | 0.797 | 0.048 | 0         | 0         |
| 14 | CD74     | 1.493648221 | 0.986 | 0.356 | 0         | 0         |
| 14 | CTSB     | 1.487613605 | 0.784 | 0.306 | 0         | 0         |
| 14 | CD68     | 1.487457702 | 0.727 | 0.091 | 0         | 0         |
| 14 | HLA-DRB1 | 1.477415389 | 0.843 | 0.188 | 0         | 0         |
| 14 | LGMN     | 1.443957831 | 0.692 | 0.17  | 0         | 0         |
| 14 | FOLR2    | 1.416106619 | 0.71  | 0.006 | 0         | 0         |
| 14 | CD83     | 1.40164922  | 0.736 | 0.107 | 0         | 0         |
| 14 | FTH1     | 1.395379996 | 1     | 0.95  | 0         | 0         |
| 14 | CST3     | 1.365564078 | 0.998 | 0.792 | 0         | 0         |
| 14 | BCL2A1   | 1.329665893 | 0.464 | 0.035 | 0         | 0         |
| 14 | HLA-DPA1 | 1.324828698 | 0.783 | 0.158 | 0         | 0         |
| 14 | MS4A6A   | 1.236133274 | 0.671 | 0.025 | 0         | 0         |
| 14 | PLEK     | 1.234900433 | 0.646 | 0.032 | 0         | 0         |
| 14 | HLA-DPB1 | 1.227722375 | 0.788 | 0.176 | 0         | 0         |
| 14 | CTSL     | 1.227588647 | 0.659 | 0.243 | 0         | 0         |
| 14 | SAT1     | 1.22521329  | 0.998 | 0.787 | 0         | 0         |
| 14 | MS4A7    | 1.156465439 | 0.647 | 0.011 | 0         | 0         |
| 14 | CD14     | 1.148566397 | 0.577 | 0.057 | 0         | 0         |
| 14 | CTSZ     | 1.121651948 | 0.692 | 0.191 | 0         | 0         |
| 14 | IER3     | 1.105604594 | 0.98  | 0.776 | 0         | 0         |
| 14 | LAPTM5   | 1.10328091  | 0.663 | 0.093 | 0         | 0         |
| 14 | CTSC     | 1.101609868 | 0.662 | 0.225 | 0         | 0         |
| 14 | CTSD     | 1.156265264 | 0.778 | 0.495 | 1.41E-265 | 3.35E-261 |
| 15 | HLA-DRA  | 3.297387094 | 0.996 | 0.22  | 0         | 0         |
| 15 | HLA-DPB1 | 3.242868501 | 0.984 | 0.172 | 0         | 0         |
| 15 | LYZ      | 3.229776492 | 0.965 | 0.027 | 0         | 0         |
| 15 | HLA-DRB1 | 3.098190061 | 0.987 | 0.184 | 0         | 0         |
| 15 | HLA-DPA1 | 2.994071639 | 0.979 | 0.153 | 0         | 0         |
| 15 | CD74     | 2.954300571 | 0.998 | 0.356 | 0         | 0         |
| 15 | CXCL8    | 2.861779523 | 0.833 | 0.087 | 0         | 0         |
| 15 | G0S2     | 2.828201695 | 0.745 | 0.075 | 0         | 0         |
| 15 | HLA-DQA1 | 2.806684774 | 0.955 | 0.076 | 0         | 0         |

|    |          |             |       |       |           |           |
|----|----------|-------------|-------|-------|-----------|-----------|
| 15 | HLA-DQB1 | 2.743052044 | 0.962 | 0.115 | 0         | 0         |
| 15 | IL1B     | 2.550244952 | 0.772 | 0.024 | 0         | 0         |
| 15 | SRGN     | 2.344776928 | 0.947 | 0.174 | 0         | 0         |
| 15 | GPR183   | 2.122127102 | 0.847 | 0.068 | 0         | 0         |
| 15 | FCER1A   | 2.119045548 | 0.803 | 0.013 | 0         | 0         |
| 15 | INSIG1   | 2.045886711 | 0.859 | 0.214 | 0         | 0         |
| 15 | C15orf48 | 1.975722785 | 0.728 | 0.03  | 0         | 0         |
| 15 | BCL2A1   | 1.899470622 | 0.798 | 0.026 | 0         | 0         |
| 15 | TYROBP   | 1.880973817 | 0.94  | 0.053 | 0         | 0         |
| 15 | CST3     | 1.853602613 | 0.997 | 0.792 | 0         | 0         |
| 15 | SAT1     | 1.839121122 | 0.989 | 0.788 | 0         | 0         |
| 15 | PLAUR    | 1.831938401 | 0.895 | 0.186 | 0         | 0         |
| 15 | LST1     | 1.79832816  | 0.927 | 0.029 | 0         | 0         |
| 15 | CD83     | 1.782532544 | 0.864 | 0.104 | 0         | 0         |
| 15 | COTL1    | 1.755993406 | 0.948 | 0.164 | 0         | 0         |
| 15 | CXCL3    | 1.727904853 | 0.505 | 0.128 | 0         | 0         |
| 15 | FCER1G   | 1.688750527 | 0.893 | 0.047 | 0         | 0         |
| 15 | HLA-DMA  | 1.592604607 | 0.923 | 0.103 | 0         | 0         |
| 15 | AIF1     | 1.540011422 | 0.9   | 0.036 | 0         | 0         |
| 15 | PLEK     | 1.537494536 | 0.842 | 0.027 | 0         | 0         |
| 15 | CLEC10A  | 1.528415242 | 0.764 | 0.009 | 0         | 0         |
| 15 | FTH1     | 1.459511885 | 1     | 0.95  | 0         | 0         |
| 15 | CPVL     | 1.415797042 | 0.741 | 0.052 | 0         | 0         |
| 15 | BIRC3    | 1.372117149 | 0.781 | 0.156 | 0         | 0         |
| 15 | RGS2     | 1.362943523 | 0.741 | 0.182 | 0         | 0         |
| 15 | REL      | 1.361847644 | 0.898 | 0.425 | 0         | 0         |
| 15 | HLA-DRB5 | 1.353177853 | 0.273 | 0.038 | 0         | 0         |
| 15 | CD1C     | 1.337959744 | 0.666 | 0.003 | 0         | 0         |
| 15 | CCR7     | 1.29133497  | 0.422 | 0.018 | 0         | 0         |
| 15 | SERPINB9 | 1.286042099 | 0.733 | 0.069 | 0         | 0         |
| 15 | HLA-DMB  | 1.279460306 | 0.814 | 0.05  | 0         | 0         |
| 15 | RGS1     | 1.270100393 | 0.573 | 0.042 | 0         | 0         |
| 15 | LGALS2   | 1.253935085 | 0.709 | 0.004 | 0         | 0         |
| 15 | CYBA     | 1.23291901  | 0.95  | 0.323 | 0         | 0         |
| 15 | TMSB4X   | 1.228153614 | 1     | 0.993 | 0         | 0         |
| 15 | NAMPT    | 1.205391297 | 0.877 | 0.455 | 0         | 0         |
| 15 | DUSP2    | 1.199907988 | 0.797 | 0.176 | 0         | 0         |
| 15 | CXCL2    | 1.190111592 | 0.573 | 0.199 | 0         | 0         |
| 15 | EMP3     | 1.178459385 | 0.931 | 0.4   | 0         | 0         |
| 15 | CCL3     | 1.120609773 | 0.348 | 0.037 | 0         | 0         |
| 15 | ID2      | 1.133108692 | 0.836 | 0.596 | 2.81E-296 | 6.68E-292 |
| 16 | POSTN    | 1.248631345 | 0.65  | 0.2   | 0         | 0         |
| 16 | COL1A1   | 1.173927063 | 0.961 | 0.482 | 0         | 0         |
| 16 | COL1A2   | 1.165962865 | 0.961 | 0.469 | 0         | 0         |
| 16 | COL6A2   | 1.000339441 | 0.958 | 0.496 | 0         | 0         |
| 16 | LUM      | 0.971908548 | 0.869 | 0.296 | 0         | 0         |
| 16 | GPC3     | 0.963260415 | 0.508 | 0.087 | 0         | 0         |
| 16 | MFAP4    | 0.962412568 | 0.782 | 0.267 | 0         | 0         |
| 16 | HTRA1    | 0.960727541 | 0.746 | 0.269 | 0         | 0         |
| 16 | TNMD     | 0.94718035  | 0.333 | 0.029 | 0         | 0         |
| 16 | LGALS1   | 0.916727687 | 0.986 | 0.666 | 0         | 0         |
| 16 | ASPN     | 0.900795006 | 0.51  | 0.109 | 0         | 0         |
| 16 | COL6A1   | 0.870320187 | 0.9   | 0.427 | 0         | 0         |
| 16 | MEG3     | 0.861717631 | 0.681 | 0.176 | 0         | 0         |
| 16 | COL3A1   | 0.828679889 | 0.882 | 0.386 | 0         | 0         |
| 16 | PTN      | 0.782991699 | 0.591 | 0.141 | 0         | 0         |
| 16 | MFAP5    | 0.781750202 | 0.528 | 0.114 | 0         | 0         |
| 16 | COL6A3   | 0.724336701 | 0.666 | 0.204 | 0         | 0         |
| 16 | DPT      | 0.683592311 | 0.62  | 0.165 | 0         | 0         |
| 16 | VCAN     | 0.636945131 | 0.565 | 0.153 | 0         | 0         |
| 16 | COL11A1  | 0.62865461  | 0.29  | 0.013 | 0         | 0         |
| 16 | TNN      | 0.602159482 | 0.313 | 0.012 | 0         | 0         |
| 16 | F2R      | 0.596571732 | 0.499 | 0.139 | 0         | 0         |
| 16 | MXRA8    | 0.592916604 | 0.666 | 0.201 | 0         | 0         |

|    |          |             |       |       |           |           |
|----|----------|-------------|-------|-------|-----------|-----------|
| 16 | TMEM119  | 0.548047127 | 0.412 | 0.094 | 0         | 0         |
| 16 | MMP2     | 0.54773998  | 0.771 | 0.247 | 0         | 0         |
| 16 | DCN      | 0.532042624 | 0.984 | 0.553 | 0         | 0         |
| 16 | EDNRA    | 0.523187895 | 0.37  | 0.05  | 0         | 0         |
| 16 | LAMC3    | 0.50353163  | 0.357 | 0.041 | 0         | 0         |
| 16 | SPARC    | 0.942748645 | 0.935 | 0.592 | 2.48E-303 | 5.91E-299 |
| 16 | PCOLCE   | 0.583386563 | 0.764 | 0.314 | 5.26E-292 | 1.25E-287 |
| 16 | CD99     | 0.651234151 | 0.949 | 0.698 | 3.48E-290 | 8.29E-286 |
| 16 | PRELP    | 0.613778291 | 0.444 | 0.13  | 4.06E-270 | 9.66E-266 |
| 16 | 11-Sep   | 0.471962379 | 0.48  | 0.172 | 2.42E-227 | 5.77E-223 |
| 16 | PRRX1    | 0.477374157 | 0.555 | 0.215 | 2.08E-220 | 4.94E-216 |
| 16 | DKK3     | 0.500912022 | 0.481 | 0.181 | 4.21E-215 | 1.00E-210 |
| 16 | MDK      | 0.550947263 | 0.489 | 0.186 | 8.99E-209 | 2.14E-204 |
| 16 | LAPT4A   | 0.493950797 | 0.989 | 0.898 | 2.83E-199 | 6.74E-195 |
| 16 | C6orf48  | 0.580028713 | 0.814 | 0.606 | 9.80E-199 | 2.33E-194 |
| 16 | ZBTB20   | 0.55353145  | 0.602 | 0.297 | 9.00E-194 | 2.14E-189 |
| 16 | SELENOP  | 0.486851514 | 0.882 | 0.63  | 1.14E-193 | 2.72E-189 |
| 16 | VIM      | 0.588182575 | 0.988 | 0.707 | 1.40E-183 | 3.34E-179 |
| 16 | S100A6   | 0.503844507 | 0.997 | 0.823 | 6.33E-177 | 1.51E-172 |
| 16 | TCF4     | 0.521257409 | 0.633 | 0.329 | 1.56E-174 | 3.72E-170 |
| 16 | PRSS23   | 0.509880318 | 0.472 | 0.188 | 4.59E-173 | 1.09E-168 |
| 16 | SOD3     | 0.534966926 | 0.735 | 0.392 | 6.05E-172 | 1.44E-167 |
| 16 | CTGF     | 0.525562419 | 0.533 | 0.26  | 1.11E-124 | 2.63E-120 |
| 16 | BGN      | 0.695078526 | 0.586 | 0.332 | 1.31E-124 | 3.12E-120 |
| 16 | IGFBP6   | 0.624421172 | 0.382 | 0.158 | 1.93E-112 | 4.59E-108 |
| 16 | MRPS6    | 0.483999873 | 0.501 | 0.326 | 1.19E-74  | 2.83E-70  |
| 16 | HES1     | 0.47283778  | 0.745 | 0.597 | 1.38E-48  | 3.28E-44  |
| 17 | ACKR1    | 1.766103545 | 0.723 | 0.058 | 0         | 0         |
| 17 | PLVAP    | 1.61176759  | 0.849 | 0.066 | 0         | 0         |
| 17 | AQP1     | 1.583184894 | 0.885 | 0.187 | 0         | 0         |
| 17 | GNG11    | 1.458884568 | 0.923 | 0.253 | 0         | 0         |
| 17 | SPARCL1  | 1.454809771 | 0.951 | 0.338 | 0         | 0         |
| 17 | IFI27    | 1.417851085 | 0.992 | 0.466 | 0         | 0         |
| 17 | CD74     | 1.298284657 | 0.965 | 0.36  | 0         | 0         |
| 17 | RAMP2    | 1.285995514 | 0.821 | 0.129 | 0         | 0         |
| 17 | RAMP3    | 1.275758982 | 0.723 | 0.065 | 0         | 0         |
| 17 | PECAM1   | 1.247736754 | 0.77  | 0.084 | 0         | 0         |
| 17 | VWF      | 1.200007989 | 0.707 | 0.068 | 0         | 0         |
| 17 | IFITM3   | 1.178027076 | 1     | 0.757 | 0         | 0         |
| 17 | CLDN5    | 1.126455925 | 0.685 | 0.077 | 0         | 0         |
| 17 | ENG      | 1.11578297  | 0.748 | 0.142 | 0         | 0         |
| 17 | ECSCR    | 1.102680261 | 0.748 | 0.069 | 0         | 0         |
| 17 | NPDC1    | 1.088309724 | 0.782 | 0.176 | 0         | 0         |
| 17 | EGFL7    | 1.084506934 | 0.75  | 0.089 | 0         | 0         |
| 17 | A2M      | 1.000925968 | 0.747 | 0.186 | 0         | 0         |
| 17 | TMSB10   | 0.982875986 | 1     | 0.973 | 0         | 0         |
| 17 | GIMAP7   | 0.972583833 | 0.642 | 0.07  | 0         | 0         |
| 17 | EMCN     | 0.903102846 | 0.652 | 0.093 | 0         | 0         |
| 17 | FKBP1A   | 0.901226444 | 0.939 | 0.684 | 0         | 0         |
| 17 | CCL14    | 0.896230596 | 0.573 | 0.044 | 0         | 0         |
| 17 | IGFBP7   | 0.88554233  | 0.999 | 0.641 | 0         | 0         |
| 17 | PCAT19   | 0.87740258  | 0.674 | 0.068 | 0         | 0         |
| 17 | BCAM     | 0.875588517 | 0.757 | 0.2   | 0         | 0         |
| 17 | CRIP2    | 0.866092115 | 0.8   | 0.423 | 0         | 0         |
| 17 | ADGRL4   | 0.864436331 | 0.633 | 0.063 | 0         | 0         |
| 17 | CLEC14A  | 0.854485069 | 0.605 | 0.072 | 0         | 0         |
| 17 | TSPAN7   | 0.848627472 | 0.602 | 0.063 | 0         | 0         |
| 17 | IFITM2   | 0.831300886 | 0.935 | 0.553 | 0         | 0         |
| 17 | TMSB4X   | 0.828101306 | 1     | 0.993 | 0         | 0         |
| 17 | HSPG2    | 0.827196587 | 0.672 | 0.22  | 0         | 0         |
| 17 | HLA-DRB1 | 0.824406327 | 0.866 | 0.191 | 0         | 0         |
| 17 | CD34     | 0.8242484   | 0.639 | 0.138 | 0         | 0         |
| 17 | HLA-E    | 0.808758533 | 0.998 | 0.881 | 0         | 0         |
| 17 | RBP7     | 0.802318516 | 0.513 | 0.083 | 0         | 0         |

|    |          |             |       |       |           |           |
|----|----------|-------------|-------|-------|-----------|-----------|
| 17 | COL15A1  | 0.754603631 | 0.582 | 0.155 | 0         | 0         |
| 17 | ESAM     | 0.729726855 | 0.609 | 0.111 | 0         | 0         |
| 17 | RNASE1   | 0.726709016 | 0.717 | 0.094 | 0         | 0         |
| 17 | MYL12A   | 0.718378327 | 0.985 | 0.835 | 0         | 0         |
| 17 | TM4SF1   | 0.709593887 | 0.813 | 0.284 | 0         | 0         |
| 17 | SNCG     | 0.708247433 | 0.625 | 0.132 | 0         | 0         |
| 17 | TGFBR2   | 0.703463129 | 0.614 | 0.182 | 0         | 0         |
| 17 | IFITM1   | 0.708480546 | 0.678 | 0.266 | 4.87E-300 | 1.16E-295 |
| 17 | ADIRF    | 0.775977177 | 0.952 | 0.627 | 1.06E-258 | 2.51E-254 |
| 17 | CCDC85B  | 0.747151365 | 0.763 | 0.516 | 2.92E-248 | 6.96E-244 |
| 17 | ID1      | 0.950430961 | 0.72  | 0.4   | 6.01E-242 | 1.43E-237 |
| 17 | TXNIP    | 0.819719315 | 0.79  | 0.523 | 2.59E-229 | 6.17E-225 |
| 17 | CLU      | 0.997649062 | 0.613 | 0.351 | 2.06E-143 | 4.91E-139 |
| 18 | FABP4    | 3.523489826 | 0.884 | 0.123 | 0         | 0         |
| 18 | RBP7     | 2.583933355 | 0.914 | 0.074 | 0         | 0         |
| 18 | CD36     | 2.207234099 | 0.843 | 0.068 | 0         | 0         |
| 18 | GNG11    | 1.986585467 | 1     | 0.252 | 0         | 0         |
| 18 | CLDN5    | 1.946970212 | 0.929 | 0.071 | 0         | 0         |
| 18 | A2M      | 1.938782139 | 0.99  | 0.18  | 0         | 0         |
| 18 | RGS5     | 1.887271304 | 0.789 | 0.078 | 0         | 0         |
| 18 | AQP1     | 1.808798286 | 0.961 | 0.185 | 0         | 0         |
| 18 | IFI27    | 1.758427389 | 0.999 | 0.466 | 0         | 0         |
| 18 | PLVAP    | 1.712806231 | 0.92  | 0.065 | 0         | 0         |
| 18 | SLC9A3R2 | 1.612989347 | 0.942 | 0.151 | 0         | 0         |
| 18 | BST2     | 1.601024538 | 0.971 | 0.195 | 0         | 0         |
| 18 | RAMP2    | 1.600069032 | 0.974 | 0.125 | 0         | 0         |
| 18 | COL4A1   | 1.553630319 | 0.889 | 0.134 | 0         | 0         |
| 18 | PECAM1   | 1.542484755 | 0.974 | 0.079 | 0         | 0         |
| 18 | SPARCL1  | 1.538765089 | 0.999 | 0.337 | 0         | 0         |
| 18 | EGFL7    | 1.501880732 | 0.9   | 0.085 | 0         | 0         |
| 18 | VWF      | 1.440241399 | 0.929 | 0.063 | 0         | 0         |
| 18 | COL4A2   | 1.408094694 | 0.909 | 0.152 | 0         | 0         |
| 18 | TM4SF1   | 1.338722561 | 0.98  | 0.28  | 0         | 0         |
| 18 | COL15A1  | 1.330883797 | 0.935 | 0.147 | 0         | 0         |
| 18 | RAMP3    | 1.312034859 | 0.836 | 0.062 | 0         | 0         |
| 18 | NDUFA4L2 | 1.308612952 | 0.771 | 0.23  | 0         | 0         |
| 18 | CAV1     | 1.303855922 | 0.996 | 0.651 | 0         | 0         |
| 18 | ADGRL4   | 1.262791533 | 0.922 | 0.057 | 0         | 0         |
| 18 | IGFBP7   | 1.259254085 | 1     | 0.641 | 0         | 0         |
| 18 | ESAM     | 1.245452731 | 0.948 | 0.103 | 0         | 0         |
| 18 | ENG      | 1.214435251 | 0.933 | 0.138 | 0         | 0         |
| 18 | MGLL     | 1.205628183 | 0.92  | 0.193 | 0         | 0         |
| 18 | EPAS1    | 1.184580389 | 0.953 | 0.19  | 0         | 0         |
| 18 | CD34     | 1.180888762 | 0.922 | 0.132 | 0         | 0         |
| 18 | VAMP5    | 1.177230823 | 0.954 | 0.265 | 0         | 0         |
| 18 | CRIP2    | 1.170026122 | 0.977 | 0.419 | 0         | 0         |
| 18 | CD300LG  | 1.151461309 | 0.63  | 0.009 | 0         | 0         |
| 18 | TINAGL1  | 1.137102264 | 0.935 | 0.141 | 0         | 0         |
| 18 | ACKR1    | 1.131304114 | 0.478 | 0.064 | 0         | 0         |
| 18 | NPDC1    | 1.126511703 | 0.94  | 0.173 | 0         | 0         |
| 18 | ANGPT2   | 1.11852182  | 0.733 | 0.093 | 0         | 0         |
| 18 | PCAT19   | 1.115999642 | 0.906 | 0.063 | 0         | 0         |
| 18 | TGFBR2   | 1.093138705 | 0.919 | 0.175 | 0         | 0         |
| 18 | CLEC14A  | 1.084631727 | 0.852 | 0.066 | 0         | 0         |
| 18 | IGFBP2   | 1.077959976 | 0.91  | 0.118 | 0         | 0         |
| 18 | FAM241A  | 1.077368612 | 0.867 | 0.153 | 0         | 0         |
| 18 | CD74     | 1.063710481 | 0.974 | 0.36  | 0         | 0         |
| 18 | ECSCR    | 1.061665993 | 0.911 | 0.065 | 0         | 0         |
| 18 | FKBP1A   | 1.059620124 | 0.983 | 0.683 | 0         | 0         |
| 18 | TMSB10   | 1.055339955 | 1     | 0.973 | 0         | 0         |
| 18 | LMCD1    | 1.036467579 | 0.864 | 0.131 | 0         | 0         |
| 18 | TIMP3    | 1.034182254 | 0.978 | 0.386 | 0         | 0         |
| 18 | EMCN     | 1.030912046 | 0.898 | 0.088 | 0         | 0         |
| 19 | AQP5     | 2.356120258 | 0.733 | 0.021 | 0         | 0         |

|    |         |             |       |       |           |           |
|----|---------|-------------|-------|-------|-----------|-----------|
| 19 | SNORC   | 2.171497307 | 0.744 | 0.015 | 0         | 0         |
| 19 | KRT19   | 1.885147375 | 0.679 | 0.032 | 0         | 0         |
| 19 | GAPDH   | 1.759623037 | 1     | 0.996 | 0         | 0         |
| 19 | ZG16B   | 1.731288429 | 0.446 | 0.057 | 0         | 0         |
| 19 | CA6     | 1.621725597 | 0.517 | 0.007 | 0         | 0         |
| 19 | KRT18   | 1.599839477 | 0.645 | 0.074 | 0         | 0         |
| 19 | KRT7    | 1.55257752  | 0.604 | 0.036 | 0         | 0         |
| 19 | CLDN10  | 1.488940925 | 0.471 | 0.01  | 0         | 0         |
| 19 | KRT8    | 1.428738655 | 0.565 | 0.059 | 0         | 0         |
| 19 | SFRP1   | 1.398337262 | 0.458 | 0.11  | 0         | 0         |
| 19 | S100A1  | 1.26310774  | 0.571 | 0.014 | 0         | 0         |
| 19 | PPP1R1B | 1.227462479 | 0.567 | 0.018 | 0         | 0         |
| 19 | KRT15   | 1.202912986 | 0.795 | 0.176 | 0         | 0         |
| 19 | DBI     | 1.198878122 | 0.995 | 0.749 | 0         | 0         |
| 19 | NDRG2   | 1.133997643 | 0.622 | 0.229 | 0         | 0         |
| 19 | TPD52L1 | 0.885482715 | 0.474 | 0.101 | 0         | 0         |
| 19 | ELF3    | 0.875220185 | 0.329 | 0.029 | 0         | 0         |
| 19 | STAC2   | 0.792149817 | 0.332 | 0.013 | 0         | 0         |
| 19 | DNER    | 0.78810041  | 0.29  | 0.008 | 0         | 0         |
| 19 | TESC    | 0.750827649 | 0.356 | 0.038 | 0         | 0         |
| 19 | NCALD   | 0.740395909 | 0.367 | 0.037 | 0         | 0         |
| 19 | ROPN1B  | 0.738272906 | 0.375 | 0.007 | 0         | 0         |
| 19 | EPCAM   | 0.703031379 | 0.326 | 0.039 | 0         | 0         |
| 19 | COX7C   | 1.003199961 | 0.998 | 0.951 | 1.01E-297 | 2.39E-293 |
| 19 | AKR1C1  | 0.927242295 | 0.417 | 0.106 | 4.47E-282 | 1.07E-277 |
| 19 | CALM2   | 0.823880026 | 1     | 0.957 | 1.40E-278 | 3.34E-274 |
| 19 | CD24    | 0.924712012 | 0.38  | 0.086 | 7.27E-278 | 1.73E-273 |
| 19 | SLC12A2 | 1.549025428 | 0.358 | 0.081 | 5.68E-274 | 1.35E-269 |
| 19 | FXYD3   | 0.840519618 | 0.983 | 0.481 | 8.59E-273 | 2.05E-268 |
| 19 | CHCHD10 | 1.119389288 | 0.668 | 0.33  | 3.36E-271 | 8.00E-267 |
| 19 | COX5B   | 0.871898273 | 0.997 | 0.857 | 1.15E-265 | 2.74E-261 |
| 19 | LDHA    | 1.067273007 | 0.992 | 0.936 | 2.58E-261 | 6.14E-257 |
| 19 | PDCD4   | 1.189736444 | 0.595 | 0.271 | 4.09E-250 | 9.72E-246 |
| 19 | ATP5MC3 | 0.905575404 | 0.977 | 0.702 | 1.06E-242 | 2.51E-238 |
| 19 | ATP1B1  | 1.203222727 | 0.44  | 0.137 | 1.22E-231 | 2.90E-227 |
| 19 | HINT1   | 0.728985162 | 0.998 | 0.903 | 7.40E-224 | 1.76E-219 |
| 19 | PPDPF   | 0.752157528 | 0.995 | 0.874 | 1.04E-222 | 2.47E-218 |
| 19 | COX7A2  | 0.718326076 | 0.991 | 0.862 | 1.06E-177 | 2.53E-173 |
| 19 | NDUFA1  | 0.692200238 | 0.959 | 0.68  | 5.10E-174 | 1.21E-169 |
| 19 | CD59    | 0.880332696 | 0.971 | 0.61  | 6.09E-173 | 1.45E-168 |
| 19 | PEBP1   | 0.747165269 | 0.99  | 0.82  | 2.14E-170 | 5.08E-166 |
| 19 | ENO1    | 0.828531887 | 0.977 | 0.823 | 1.99E-165 | 4.73E-161 |
| 19 | UQCRB   | 0.70273757  | 0.979 | 0.86  | 7.20E-165 | 1.71E-160 |
| 19 | ATP1A1  | 0.867128143 | 0.976 | 0.627 | 6.39E-157 | 1.52E-152 |
| 19 | SOD2    | 0.693690863 | 0.9   | 0.496 | 8.22E-143 | 1.96E-138 |
| 19 | ATP5F1B | 0.716558004 | 0.98  | 0.814 | 4.97E-135 | 1.18E-130 |
| 19 | CLDN4   | 0.808252803 | 0.362 | 0.205 | 1.86E-53  | 4.42E-49  |
| 19 | SDC4    | 1.035481084 | 0.336 | 0.218 | 2.67E-40  | 6.35E-36  |
| 19 | MT-CO1  | 0.789542364 | 0.999 | 0.995 | 6.30E-11  | 1.50E-06  |
| 20 | KRT15   | 3.078848369 | 1     | 0.172 | 0         | 0         |
| 20 | KRT14   | 1.535970999 | 0.998 | 0.669 | 0         | 0         |
| 20 | DST     | 1.441361864 | 0.943 | 0.324 | 0         | 0         |
| 20 | KRT5    | 1.4090983   | 1     | 0.488 | 0         | 0         |
| 20 | S100A2  | 1.316276552 | 0.966 | 0.378 | 0         | 0         |
| 20 | COL17A1 | 1.238602458 | 0.909 | 0.141 | 0         | 0         |
| 20 | POSTN   | 0.822755389 | 0.844 | 0.199 | 0         | 0         |
| 20 | SOX15   | 0.768468408 | 0.784 | 0.269 | 0         | 0         |
| 20 | HOPX    | 0.735092205 | 0.863 | 0.383 | 0         | 0         |
| 20 | ARL4A   | 0.730829614 | 0.769 | 0.288 | 0         | 0         |
| 20 | FBXW7   | 0.721378673 | 0.75  | 0.241 | 0         | 0         |
| 20 | ALDH3A1 | 0.706603252 | 0.636 | 0.117 | 0         | 0         |
| 20 | TGFBI   | 0.706174594 | 0.796 | 0.275 | 0         | 0         |
| 20 | CXADR   | 0.674144147 | 0.805 | 0.242 | 0         | 0         |
| 20 | SYT8    | 0.657763798 | 0.481 | 0.091 | 0         | 0         |

|    |          |             |       |       |           |           |
|----|----------|-------------|-------|-------|-----------|-----------|
| 20 | NDFIP2   | 0.534942724 | 0.724 | 0.246 | 0         | 0         |
| 20 | LAMB3    | 0.532159416 | 0.581 | 0.087 | 0         | 0         |
| 20 | FGFR3    | 0.520288479 | 0.603 | 0.165 | 0         | 0         |
| 20 | CXCL14   | 0.759409926 | 0.993 | 0.76  | 1.62E-300 | 3.86E-296 |
| 20 | ATP1B3   | 0.723920032 | 0.94  | 0.64  | 7.21E-297 | 1.72E-292 |
| 20 | ALDH3A2  | 0.542940747 | 0.699 | 0.249 | 3.38E-281 | 8.05E-277 |
| 20 | HSPA2    | 0.723066681 | 0.804 | 0.366 | 2.01E-279 | 4.79E-275 |
| 20 | SPINT2   | 0.569331987 | 0.88  | 0.389 | 4.08E-271 | 9.72E-267 |
| 20 | IMPA2    | 0.53021361  | 0.7   | 0.246 | 2.01E-269 | 4.78E-265 |
| 20 | CBR1     | 0.592748579 | 0.804 | 0.356 | 2.04E-269 | 4.87E-265 |
| 20 | AQP3     | 0.718111524 | 0.952 | 0.54  | 6.09E-262 | 1.45E-257 |
| 20 | C19orf33 | 0.523766984 | 0.834 | 0.34  | 2.41E-253 | 5.73E-249 |
| 20 | ERRFI1   | 0.831815527 | 0.692 | 0.279 | 3.06E-249 | 7.29E-245 |
| 20 | AREG     | 1.247852152 | 0.595 | 0.209 | 9.20E-244 | 2.19E-239 |
| 20 | ADRB2    | 0.712053675 | 0.656 | 0.242 | 2.14E-242 | 5.10E-238 |
| 20 | TOB1     | 0.757491937 | 0.806 | 0.437 | 4.71E-241 | 1.12E-236 |
| 20 | FAM213A  | 0.56533439  | 0.706 | 0.276 | 6.69E-240 | 1.59E-235 |
| 20 | CCL27    | 0.7687491   | 0.633 | 0.229 | 4.03E-225 | 9.59E-221 |
| 20 | KLF5     | 0.708764775 | 0.85  | 0.479 | 1.15E-219 | 2.74E-215 |
| 20 | PKM      | 0.546826031 | 0.959 | 0.818 | 1.40E-209 | 3.32E-205 |
| 20 | PERP     | 0.56748657  | 1     | 0.708 | 3.06E-206 | 7.29E-202 |
| 20 | TGIF1    | 0.606318947 | 0.745 | 0.374 | 9.09E-201 | 2.16E-196 |
| 20 | SGK1     | 0.637820513 | 0.743 | 0.354 | 3.62E-197 | 8.62E-193 |
| 20 | MT1X     | 0.699415369 | 0.962 | 0.748 | 2.38E-195 | 5.67E-191 |
| 20 | PMAIP1   | 0.5523102   | 0.669 | 0.287 | 1.78E-183 | 4.23E-179 |
| 20 | ANKRD37  | 0.53028169  | 0.481 | 0.17  | 5.01E-173 | 1.19E-168 |
| 20 | GPNMB    | 0.579739105 | 0.849 | 0.556 | 2.76E-168 | 6.56E-164 |
| 20 | AMD1     | 0.637172327 | 0.792 | 0.571 | 4.90E-142 | 1.17E-137 |
| 20 | DNAJA1   | 0.673584605 | 0.919 | 0.829 | 7.87E-141 | 1.87E-136 |
| 20 | SLC38A2  | 0.532221747 | 0.878 | 0.686 | 6.32E-139 | 1.50E-134 |
| 20 | ZC3H12A  | 0.529262599 | 0.725 | 0.443 | 1.47E-128 | 3.49E-124 |
| 20 | MYC      | 0.566767423 | 0.863 | 0.702 | 3.38E-98  | 8.04E-94  |
| 20 | CKS2     | 0.56867293  | 0.679 | 0.461 | 2.90E-91  | 6.90E-87  |
| 20 | DDX5     | 0.538389084 | 0.956 | 0.935 | 6.64E-91  | 1.58E-86  |
| 20 | ATF3     | 0.543699269 | 0.767 | 0.556 | 7.47E-86  | 1.78E-81  |
| 21 | TPSB2    | 3.863621758 | 0.96  | 0.007 | 0         | 0         |
| 21 | TPSAB1   | 3.520733161 | 0.978 | 0.005 | 0         | 0         |
| 21 | CTSG     | 2.016982158 | 0.719 | 0.003 | 0         | 0         |
| 21 | HPGD     | 1.934101421 | 0.738 | 0.076 | 0         | 0         |
| 21 | FTH1     | 1.807330596 | 1     | 0.951 | 0         | 0         |
| 21 | HPGDS    | 1.725033914 | 0.674 | 0.009 | 0         | 0         |
| 21 | SELENOK  | 1.610485838 | 0.996 | 0.687 | 0         | 0         |
| 21 | ANXA1    | 1.602556542 | 1     | 0.866 | 0         | 0         |
| 21 | CD69     | 1.291495339 | 0.327 | 0.041 | 0         | 0         |
| 21 | RGS13    | 1.228706504 | 0.528 | 0.002 | 0         | 0         |
| 21 | GATA2    | 1.088911757 | 0.437 | 0.051 | 0         | 0         |
| 21 | H3F3B    | 0.890378502 | 1     | 0.997 | 0         | 0         |
| 21 | CPA3     | 0.82497721  | 0.343 | 0.001 | 0         | 0         |
| 21 | MS4A2    | 0.809021363 | 0.354 | 0     | 0         | 0         |
| 21 | FTL      | 0.736062902 | 1     | 0.97  | 0         | 0         |
| 21 | FCER1G   | 0.687062937 | 0.413 | 0.064 | 0         | 0         |
| 21 | IL1RL1   | 0.608024261 | 0.253 | 0.007 | 0         | 0         |
| 21 | PTMA     | 0.705645189 | 1     | 0.997 | 5.05E-292 | 1.20E-287 |
| 21 | GLUL     | 1.146304936 | 0.963 | 0.504 | 1.02E-280 | 2.42E-276 |
| 21 | VWA5A    | 0.808598764 | 0.363 | 0.083 | 9.30E-272 | 2.21E-267 |
| 21 | UBB      | 0.947967392 | 1     | 0.969 | 1.94E-251 | 4.62E-247 |
| 21 | SRGN     | 0.544329795 | 0.602 | 0.188 | 6.88E-246 | 1.64E-241 |
| 21 | EMP3     | 0.752730094 | 0.809 | 0.408 | 1.65E-206 | 3.92E-202 |
| 21 | SDCBP    | 0.712612347 | 0.975 | 0.542 | 2.88E-202 | 6.85E-198 |
| 21 | SGK1     | 0.786612393 | 0.736 | 0.354 | 5.22E-197 | 1.24E-192 |
| 21 | RPL34    | 0.524524633 | 1     | 1     | 1.42E-186 | 3.38E-182 |
| 21 | EIF1     | 0.501735043 | 1     | 0.999 | 7.96E-175 | 1.90E-170 |
| 21 | SAT1     | 0.612517742 | 0.998 | 0.789 | 3.56E-173 | 8.48E-169 |
| 21 | MT-CO2   | 0.464765839 | 1     | 0.995 | 2.04E-150 | 4.85E-146 |

|    |          |             |       |       |           |           |
|----|----------|-------------|-------|-------|-----------|-----------|
| 21 | CLIC1    | 0.637240924 | 1     | 0.88  | 7.23E-147 | 1.72E-142 |
| 21 | RPL36AL  | 0.625871636 | 0.999 | 0.944 | 3.31E-133 | 7.87E-129 |
| 21 | BIRC3    | 0.96165045  | 0.413 | 0.169 | 4.25E-131 | 1.01E-126 |
| 21 | HSPH1    | 0.659758442 | 0.965 | 0.534 | 2.24E-129 | 5.34E-125 |
| 21 | PRNP     | 0.610687825 | 0.926 | 0.544 | 1.58E-125 | 3.76E-121 |
| 21 | LAPTM5   | 0.495321473 | 0.323 | 0.105 | 9.93E-121 | 2.36E-116 |
| 21 | MALAT1   | 0.495446253 | 1     | 0.997 | 1.87E-119 | 4.45E-115 |
| 21 | DNAJA1   | 0.625359017 | 0.999 | 0.827 | 9.22E-115 | 2.19E-110 |
| 21 | HSPA8    | 0.639497826 | 1     | 0.931 | 4.99E-104 | 1.19E-99  |
| 21 | SEC62    | 0.473449992 | 0.982 | 0.654 | 4.33E-99  | 1.03E-94  |
| 21 | PRDX1    | 0.567741619 | 1     | 0.901 | 8.99E-98  | 2.14E-93  |
| 21 | JUND     | 0.551298077 | 0.663 | 0.428 | 3.09E-83  | 7.35E-79  |
| 21 | ELF1     | 0.789772176 | 0.415 | 0.26  | 1.06E-74  | 2.51E-70  |
| 21 | SQSTM1   | 0.470334478 | 0.99  | 0.708 | 2.38E-69  | 5.67E-65  |
| 21 | HSPE1    | 0.664740601 | 0.994 | 0.789 | 6.58E-60  | 1.57E-55  |
| 21 | DNAJB1   | 0.669507748 | 0.998 | 0.843 | 2.98E-59  | 7.10E-55  |
| 21 | SH3BGRL3 | 0.473283441 | 0.998 | 0.786 | 1.02E-56  | 2.43E-52  |
| 21 | LMNA     | 0.439330653 | 1     | 0.96  | 4.90E-47  | 1.17E-42  |
| 21 | PLIN2    | 0.668345314 | 0.383 | 0.304 | 2.65E-30  | 6.32E-26  |
| 21 | RGS2     | 0.470035563 | 0.296 | 0.196 | 5.08E-29  | 1.21E-24  |
| 21 | DNAJB9   | 0.540148631 | 0.342 | 0.273 | 7.83E-26  | 1.86E-21  |
| 22 | GJB6     | 0.663511109 | 0.332 | 0.034 | 0         | 0         |
| 22 | MT-CO3   | 1.067059106 | 1     | 0.995 | 2.26E-254 | 5.38E-250 |
| 22 | MT-CO2   | 0.944874903 | 0.999 | 0.995 | 1.14E-237 | 2.72E-233 |
| 22 | GJB2     | 0.614097012 | 0.33  | 0.066 | 5.99E-228 | 1.43E-223 |
| 22 | MT-ND5   | 0.788267543 | 0.99  | 0.949 | 5.99E-204 | 1.42E-199 |
| 22 | MT-ND1   | 0.754915478 | 0.999 | 0.994 | 1.37E-200 | 3.25E-196 |
| 22 | MT-CYB   | 0.787000795 | 0.999 | 0.995 | 1.68E-200 | 4.01E-196 |
| 22 | MT-ATP6  | 0.787853481 | 0.998 | 0.993 | 1.14E-191 | 2.72E-187 |
| 22 | MT-ND2   | 0.749278758 | 0.999 | 0.995 | 4.89E-184 | 1.16E-179 |
| 22 | MT-CO1   | 0.893297678 | 1     | 0.995 | 7.54E-177 | 1.79E-172 |
| 22 | MT-ND4   | 0.80319778  | 0.999 | 0.995 | 1.14E-170 | 2.72E-166 |
| 22 | RPS6     | 0.459855685 | 1     | 1     | 9.92E-168 | 2.36E-163 |
| 22 | RPL10A   | 0.453883199 | 1     | 0.999 | 8.53E-151 | 2.03E-146 |
| 22 | RPS18    | 0.480570776 | 1     | 1     | 4.90E-140 | 1.17E-135 |
| 22 | RPL13A   | 0.401408883 | 1     | 1     | 4.33E-131 | 1.03E-126 |
| 22 | RPL7     | 0.394308419 | 1     | 1     | 5.12E-130 | 1.22E-125 |
| 22 | RPL12    | 0.466070093 | 1     | 0.999 | 3.24E-129 | 7.72E-125 |
| 22 | RPS5     | 0.422524126 | 1     | 0.999 | 2.46E-128 | 5.86E-124 |
| 22 | MGST1    | 0.688066774 | 0.389 | 0.131 | 1.56E-127 | 3.72E-123 |
| 22 | MT-ND3   | 0.7970054   | 0.997 | 0.992 | 8.11E-127 | 1.93E-122 |
| 22 | RPL3     | 0.422808307 | 1     | 1     | 3.65E-126 | 8.69E-122 |
| 22 | RPS19    | 0.421667452 | 1     | 1     | 6.22E-119 | 1.48E-114 |
| 22 | RPL37A   | 0.36014027  | 1     | 1     | 3.08E-118 | 7.33E-114 |
| 22 | RPL8     | 0.355109183 | 1     | 1     | 7.77E-116 | 1.85E-111 |
| 22 | RPS24    | 0.366899767 | 1     | 0.998 | 6.05E-112 | 1.44E-107 |
| 22 | RPL36    | 0.416107292 | 1     | 0.999 | 2.09E-111 | 4.97E-107 |
| 22 | RPS3     | 0.402665677 | 1     | 0.999 | 2.17E-111 | 5.16E-107 |
| 22 | FAM84A   | 0.360694766 | 0.323 | 0.108 | 9.71E-104 | 2.31E-99  |
| 22 | RPLP1    | 0.407055644 | 1     | 1     | 2.00E-102 | 4.76E-98  |
| 22 | FXVD3    | 0.490649336 | 0.835 | 0.485 | 2.03E-101 | 4.84E-97  |
| 22 | RPL31    | 0.377140082 | 1     | 0.999 | 1.40E-100 | 3.34E-96  |
| 22 | KRT15    | 0.511709038 | 0.455 | 0.184 | 1.41E-99  | 3.36E-95  |
| 22 | COX4I1   | 0.410402129 | 0.998 | 0.967 | 5.70E-98  | 1.36E-93  |
| 22 | RPS21    | 0.424969705 | 0.999 | 0.994 | 3.76E-97  | 8.96E-93  |
| 22 | MT1X     | 0.380850454 | 0.954 | 0.749 | 3.89E-89  | 9.25E-85  |
| 22 | RPLP0    | 0.36116346  | 1     | 0.999 | 2.17E-88  | 5.18E-84  |
| 22 | RPL36A   | 0.408953839 | 1     | 0.988 | 6.20E-86  | 1.48E-81  |
| 22 | UQCRH    | 0.39024379  | 0.947 | 0.819 | 1.98E-85  | 4.72E-81  |
| 22 | SFRP1    | 0.387111114 | 0.311 | 0.114 | 1.51E-83  | 3.58E-79  |
| 22 | ATP1B1   | 0.491315189 | 0.343 | 0.139 | 1.49E-79  | 3.56E-75  |
| 22 | RPS2     | 0.435738692 | 1     | 1     | 2.85E-78  | 6.77E-74  |
| 22 | RPS17    | 0.374225531 | 1     | 0.996 | 2.66E-76  | 6.34E-72  |
| 22 | RPL28    | 0.401769086 | 1     | 0.999 | 4.56E-76  | 1.09E-71  |

|    |          |             |       |       |           |           |
|----|----------|-------------|-------|-------|-----------|-----------|
| 22 | SNHG8    | 0.401805634 | 0.891 | 0.705 | 1.02E-68  | 2.44E-64  |
| 22 | DAPL1    | 0.512289852 | 0.505 | 0.271 | 1.30E-63  | 3.09E-59  |
| 22 | CHCHD10  | 0.467396079 | 0.526 | 0.333 | 2.77E-59  | 6.59E-55  |
| 22 | C19orf33 | 0.436281031 | 0.568 | 0.346 | 1.95E-56  | 4.65E-52  |
| 22 | DEFB1    | 0.769882569 | 0.357 | 0.199 | 1.75E-46  | 4.16E-42  |
| 22 | ATP1A1   | 0.592177333 | 0.748 | 0.632 | 3.81E-42  | 9.08E-38  |
| 22 | ATP1B3   | 0.63007137  | 0.761 | 0.644 | 5.94E-36  | 1.41E-31  |
| 23 | RGS5     | 2.234573773 | 0.866 | 0.081 | 0         | 0         |
| 23 | NDUFA4L2 | 1.7223768   | 0.847 | 0.233 | 0         | 0         |
| 23 | IGFBP7   | 1.352209397 | 1     | 0.644 | 0         | 0         |
| 23 | CALD1    | 1.244220003 | 0.986 | 0.576 | 0         | 0         |
| 23 | CPE      | 1.139131088 | 0.858 | 0.249 | 0         | 0         |
| 23 | TINAGL1  | 1.087001896 | 0.788 | 0.149 | 0         | 0         |
| 23 | ADIRF    | 1.086848901 | 0.999 | 0.629 | 0         | 0         |
| 23 | CD36     | 1.063997354 | 0.493 | 0.079 | 0         | 0         |
| 23 | LHFPL6   | 1.052802431 | 0.818 | 0.259 | 0         | 0         |
| 23 | STEAP4   | 1.034262831 | 0.631 | 0.08  | 0         | 0         |
| 23 | COX4I2   | 1.015031127 | 0.626 | 0.057 | 0         | 0         |
| 23 | IFITM3   | 1.009670387 | 0.998 | 0.759 | 0         | 0         |
| 23 | TAGLN    | 0.959046971 | 0.918 | 0.29  | 0         | 0         |
| 23 | 7-Sep    | 0.934695419 | 0.938 | 0.626 | 0         | 0         |
| 23 | MYL9     | 0.918342919 | 0.971 | 0.454 | 0         | 0         |
| 23 | NR2F2    | 0.903441951 | 0.714 | 0.154 | 0         | 0         |
| 23 | ACTA2    | 0.900942287 | 0.787 | 0.18  | 0         | 0         |
| 23 | LGI4     | 0.780829398 | 0.569 | 0.064 | 0         | 0         |
| 23 | EPS8     | 0.755322341 | 0.643 | 0.159 | 0         | 0         |
| 23 | FAM162B  | 0.748659163 | 0.509 | 0.039 | 0         | 0         |
| 23 | 4-Sep    | 0.729162831 | 0.517 | 0.075 | 0         | 0         |
| 23 | SYNPO2   | 0.66362574  | 0.52  | 0.115 | 0         | 0         |
| 23 | HIGD1B   | 0.646053857 | 0.376 | 0.022 | 0         | 0         |
| 23 | GPM6B    | 0.629921439 | 0.502 | 0.097 | 0         | 0         |
| 23 | RERG     | 0.609550047 | 0.512 | 0.08  | 0         | 0         |
| 23 | MYO1B    | 0.608946118 | 0.503 | 0.108 | 0         | 0         |
| 23 | NOTCH3   | 0.742550744 | 0.613 | 0.175 | 2.44E-302 | 5.80E-298 |
| 23 | FABP4    | 0.972688034 | 0.553 | 0.134 | 2.11E-301 | 5.02E-297 |
| 23 | ARHGDI1  | 0.953630586 | 0.723 | 0.264 | 6.68E-298 | 1.59E-293 |
| 23 | PRRX1    | 0.745186166 | 0.692 | 0.216 | 2.53E-296 | 6.02E-292 |
| 23 | A2M      | 0.661374941 | 0.686 | 0.191 | 5.02E-294 | 1.19E-289 |
| 23 | PDGFRB   | 0.759391029 | 0.647 | 0.194 | 5.93E-288 | 1.41E-283 |
| 23 | TFPI     | 0.714012502 | 0.595 | 0.167 | 4.14E-287 | 9.86E-283 |
| 23 | COL18A1  | 0.890498252 | 0.754 | 0.284 | 7.50E-287 | 1.79E-282 |
| 23 | CYGB     | 0.766911461 | 0.534 | 0.139 | 1.24E-269 | 2.95E-265 |
| 23 | SPARCL1  | 0.772891772 | 0.867 | 0.344 | 4.60E-268 | 1.10E-263 |
| 23 | C20orf27 | 0.697070549 | 0.552 | 0.167 | 4.92E-261 | 1.17E-256 |
| 23 | SPARC    | 0.731461326 | 0.987 | 0.594 | 7.16E-261 | 1.70E-256 |
| 23 | TIMP3    | 0.90140937  | 0.828 | 0.392 | 1.20E-257 | 2.85E-253 |
| 23 | MFGE8    | 0.847410885 | 0.797 | 0.362 | 3.98E-257 | 9.48E-253 |
| 23 | GPX3     | 0.716313942 | 0.6   | 0.184 | 6.80E-241 | 1.62E-236 |
| 23 | IFITM1   | 0.745557533 | 0.707 | 0.268 | 1.13E-239 | 2.69E-235 |
| 23 | COL4A2   | 0.635439402 | 0.525 | 0.164 | 8.20E-204 | 1.95E-199 |
| 23 | IFITM2   | 0.709691219 | 0.902 | 0.557 | 3.93E-199 | 9.36E-195 |
| 23 | COL4A1   | 0.609989856 | 0.48  | 0.146 | 1.51E-186 | 3.59E-182 |
| 23 | LAPTM4A  | 0.605517131 | 0.992 | 0.899 | 1.18E-185 | 2.81E-181 |
| 23 | LGALS1   | 0.625396867 | 0.997 | 0.669 | 6.70E-165 | 1.59E-160 |
| 23 | MT2A     | 0.712066707 | 0.981 | 0.801 | 6.72E-165 | 1.60E-160 |
| 23 | THY1     | 0.646741873 | 0.576 | 0.213 | 3.02E-150 | 7.18E-146 |
| 23 | S100A4   | 0.622817936 | 0.96  | 0.673 | 2.10E-138 | 4.99E-134 |
| 24 | KRT6A    | 3.155013462 | 0.981 | 0.112 | 0         | 0         |
| 24 | KRT16    | 2.672338562 | 0.916 | 0.143 | 0         | 0         |
| 24 | KRT6B    | 2.467449613 | 0.771 | 0.046 | 0         | 0         |
| 24 | KRT5     | 2.235254077 | 0.977 | 0.491 | 0         | 0         |
| 24 | KRT14    | 2.111785623 | 0.987 | 0.671 | 0         | 0         |
| 24 | KRT6C    | 1.819756632 | 0.646 | 0.017 | 0         | 0         |
| 24 | KRT17    | 1.761204791 | 0.75  | 0.196 | 0         | 0         |

|    |          |             |       |       |           |           |
|----|----------|-------------|-------|-------|-----------|-----------|
| 24 | S100A2   | 1.744485798 | 0.931 | 0.381 | 0         | 0         |
| 24 | LY6D     | 1.455725843 | 0.975 | 0.494 | 0         | 0         |
| 24 | MT1X     | 1.405557661 | 0.986 | 0.749 | 0         | 0         |
| 24 | LGALS7   | 1.327436062 | 0.916 | 0.257 | 0         | 0         |
| 24 | S100A14  | 1.313944636 | 0.993 | 0.534 | 0         | 0         |
| 24 | CALML3   | 1.196888747 | 0.824 | 0.175 | 0         | 0         |
| 24 | TPPP3    | 1.093434507 | 0.838 | 0.326 | 0         | 0         |
| 24 | DSP      | 1.058636786 | 0.964 | 0.485 | 0         | 0         |
| 24 | C19orf33 | 1.053232713 | 0.908 | 0.341 | 0         | 0         |
| 24 | S100A16  | 0.972516975 | 0.976 | 0.596 | 0         | 0         |
| 24 | JUP      | 0.893869016 | 0.924 | 0.331 | 0         | 0         |
| 24 | PKP1     | 0.885974326 | 0.848 | 0.237 | 0         | 0         |
| 24 | TRIM29   | 0.884282382 | 0.916 | 0.273 | 0         | 0         |
| 24 | IGFL1    | 0.821691045 | 0.346 | 0.006 | 0         | 0         |
| 24 | PKP3     | 0.765034899 | 0.843 | 0.228 | 0         | 0         |
| 24 | IMPA2    | 0.754584634 | 0.842 | 0.246 | 0         | 0         |
| 24 | LAD1     | 0.743327367 | 0.744 | 0.164 | 0         | 0         |
| 24 | DSC3     | 0.82617956  | 0.906 | 0.354 | 4.60E-304 | 1.10E-299 |
| 24 | SPINT2   | 0.755262709 | 0.918 | 0.391 | 2.29E-302 | 5.45E-298 |
| 24 | RHOV     | 0.663377417 | 0.686 | 0.189 | 2.09E-300 | 4.97E-296 |
| 24 | PERP     | 1.043198421 | 1     | 0.709 | 1.15E-294 | 2.74E-290 |
| 24 | FXYD3    | 0.766736818 | 0.976 | 0.483 | 1.32E-277 | 3.14E-273 |
| 24 | DAPL1    | 0.6184722   | 0.812 | 0.267 | 3.60E-272 | 8.57E-268 |
| 24 | FGFBP1   | 0.649773886 | 0.667 | 0.183 | 1.43E-268 | 3.40E-264 |
| 24 | MT1G     | 0.650644012 | 0.458 | 0.098 | 7.22E-267 | 1.72E-262 |
| 24 | HOPX     | 0.717315419 | 0.886 | 0.385 | 2.90E-265 | 6.90E-261 |
| 24 | AQP3     | 0.849036241 | 0.984 | 0.541 | 1.44E-263 | 3.44E-259 |
| 24 | LGALS7B  | 0.855846481 | 0.978 | 0.528 | 1.78E-258 | 4.24E-254 |
| 24 | CLTB     | 0.676216805 | 0.955 | 0.661 | 3.48E-256 | 8.29E-252 |
| 24 | SERPINB5 | 0.671344133 | 0.912 | 0.379 | 3.48E-253 | 8.28E-249 |
| 24 | GSTP1    | 0.666578845 | 0.992 | 0.926 | 4.31E-245 | 1.02E-240 |
| 24 | CA2      | 0.624911536 | 0.643 | 0.193 | 2.97E-242 | 7.06E-238 |
| 24 | FAM213A  | 0.604647101 | 0.755 | 0.277 | 5.69E-226 | 1.35E-221 |
| 24 | SFN      | 0.786917028 | 1     | 0.684 | 1.21E-220 | 2.89E-216 |
| 24 | S100A8   | 0.60005979  | 0.363 | 0.072 | 2.55E-220 | 6.06E-216 |
| 24 | IFI27    | 0.894844993 | 0.861 | 0.472 | 9.46E-200 | 2.25E-195 |
| 24 | DMKN     | 1.011969334 | 0.919 | 0.609 | 2.31E-197 | 5.49E-193 |
| 24 | FABP5    | 1.097396845 | 0.845 | 0.533 | 7.67E-190 | 1.82E-185 |
| 24 | PDLIM1   | 0.618252249 | 0.842 | 0.47  | 3.00E-179 | 7.13E-175 |
| 24 | COL17A1  | 0.600023121 | 0.497 | 0.15  | 1.58E-161 | 3.76E-157 |
| 24 | MT1E     | 0.80440509  | 0.773 | 0.465 | 2.75E-144 | 6.54E-140 |
| 24 | KRT1     | 0.904407703 | 0.849 | 0.581 | 3.91E-134 | 9.31E-130 |
| 24 | KRT10    | 0.973373111 | 0.928 | 0.854 | 2.50E-63  | 5.95E-59  |
| 25 | S100A8   | 3.463071706 | 0.989 | 0.063 | 0         | 0         |
| 25 | S100A9   | 3.012122806 | 0.928 | 0.064 | 0         | 0         |
| 25 | S100A7   | 2.83996266  | 0.841 | 0.028 | 0         | 0         |
| 25 | SPRR1B   | 1.792988834 | 0.442 | 0.068 | 0         | 0         |
| 25 | LGALS7B  | 1.51827461  | 0.994 | 0.528 | 0         | 0         |
| 25 | KRT6A    | 1.382413705 | 0.601 | 0.118 | 0         | 0         |
| 25 | LY6D     | 1.37657574  | 0.95  | 0.495 | 0         | 0         |
| 25 | S100A14  | 1.153560105 | 0.978 | 0.534 | 0         | 0         |
| 25 | CSTA     | 1.117506296 | 0.783 | 0.258 | 0         | 0         |
| 25 | CCL27    | 1.102086192 | 0.802 | 0.228 | 0         | 0         |
| 25 | TMEM45A  | 1.044506578 | 0.818 | 0.292 | 0         | 0         |
| 25 | IMPA2    | 0.774810404 | 0.792 | 0.247 | 0         | 0         |
| 25 | CALML3   | 1.060724357 | 0.659 | 0.177 | 4.54E-306 | 1.08E-301 |
| 25 | TRIM29   | 0.694036841 | 0.83  | 0.275 | 4.27E-296 | 1.02E-291 |
| 25 | KRT16    | 1.598858438 | 0.588 | 0.148 | 3.05E-290 | 7.27E-286 |
| 25 | SFN      | 1.138595293 | 1     | 0.684 | 7.75E-289 | 1.84E-284 |
| 25 | DAPL1    | 0.726767188 | 0.789 | 0.267 | 4.58E-276 | 1.09E-271 |
| 25 | LYPD3    | 1.185238072 | 0.91  | 0.453 | 9.53E-276 | 2.27E-271 |
| 25 | SPINK5   | 0.777542322 | 0.566 | 0.145 | 7.93E-266 | 1.89E-261 |
| 25 | CRABP2   | 0.920940023 | 0.753 | 0.273 | 1.39E-261 | 3.30E-257 |
| 25 | PERP     | 0.996084397 | 0.999 | 0.709 | 1.15E-258 | 2.73E-254 |

|    |          |             |       |       |           |           |
|----|----------|-------------|-------|-------|-----------|-----------|
| 25 | HMGA1    | 0.663904999 | 0.798 | 0.299 | 2.69E-256 | 6.41E-252 |
| 25 | DEFB1    | 0.714384943 | 0.659 | 0.195 | 3.87E-255 | 9.20E-251 |
| 25 | HBEGF    | 0.870414984 | 0.696 | 0.24  | 3.21E-251 | 7.64E-247 |
| 25 | TACSTD2  | 0.981606432 | 0.954 | 0.537 | 7.98E-250 | 1.90E-245 |
| 25 | PMAIP1   | 0.729663559 | 0.769 | 0.288 | 5.65E-246 | 1.35E-241 |
| 25 | SBSN     | 1.380915236 | 0.737 | 0.289 | 1.40E-244 | 3.32E-240 |
| 25 | AQP3     | 0.931457784 | 0.958 | 0.542 | 8.78E-239 | 2.09E-234 |
| 25 | CA2      | 0.890031845 | 0.616 | 0.193 | 1.68E-237 | 4.01E-233 |
| 25 | LGALS7   | 1.093501301 | 0.687 | 0.261 | 6.75E-229 | 1.61E-224 |
| 25 | GLTP     | 0.752042777 | 0.69  | 0.254 | 1.65E-222 | 3.94E-218 |
| 25 | SERPINB5 | 0.662496944 | 0.875 | 0.379 | 2.09E-222 | 4.96E-218 |
| 25 | JUP      | 0.691553786 | 0.804 | 0.333 | 7.76E-219 | 1.85E-214 |
| 25 | FGFBP1   | 0.871938521 | 0.605 | 0.184 | 4.25E-218 | 1.01E-213 |
| 25 | KRTDAP   | 1.585126172 | 0.819 | 0.44  | 3.48E-216 | 8.29E-212 |
| 25 | S100A11  | 0.657147199 | 0.999 | 0.951 | 8.93E-216 | 2.12E-211 |
| 25 | S100A16  | 0.680761864 | 0.934 | 0.597 | 3.31E-207 | 7.87E-203 |
| 25 | DMKN     | 1.154694203 | 0.897 | 0.609 | 7.25E-200 | 1.72E-195 |
| 25 | RPS4Y1   | 0.718740211 | 0.654 | 0.24  | 4.14E-191 | 9.85E-187 |
| 25 | CSTB     | 0.794175188 | 0.938 | 0.713 | 7.68E-190 | 1.83E-185 |
| 25 | TUBA1C   | 0.675814839 | 0.914 | 0.58  | 1.98E-188 | 4.71E-184 |
| 25 | KRT1     | 1.289301809 | 0.857 | 0.581 | 3.90E-183 | 9.28E-179 |
| 25 | CALML5   | 0.930011797 | 0.54  | 0.173 | 7.80E-175 | 1.86E-170 |
| 25 | KRT10    | 1.226938119 | 0.956 | 0.854 | 1.36E-173 | 3.24E-169 |
| 25 | KRT17    | 0.806892554 | 0.578 | 0.199 | 3.22E-170 | 7.67E-166 |
| 25 | PHLDA2   | 1.043402193 | 0.82  | 0.509 | 2.85E-166 | 6.79E-162 |
| 25 | FABP5    | 1.19100155  | 0.817 | 0.534 | 2.47E-149 | 5.89E-145 |
| 25 | AREG     | 0.786027179 | 0.539 | 0.211 | 4.57E-125 | 1.09E-120 |
| 25 | S100A2   | 1.142229482 | 0.607 | 0.386 | 2.13E-71  | 5.07E-67  |
| 25 | KRT2     | 0.926359455 | 0.398 | 0.33  | 1.30E-12  | 3.09E-08  |
| 26 | DCD      | 6.248746204 | 0.91  | 0.154 | 0         | 0         |
| 26 | MUCL1    | 5.384126253 | 0.92  | 0.074 | 0         | 0         |
| 26 | SCGB2A2  | 5.259035733 | 0.972 | 0.058 | 0         | 0         |
| 26 | SCGB1B2P | 4.055237009 | 0.932 | 0.022 | 0         | 0         |
| 26 | SCGB1D2  | 3.896271685 | 0.853 | 0.025 | 0         | 0         |
| 26 | PIP      | 3.648296276 | 0.707 | 0.013 | 0         | 0         |
| 26 | AZGP1    | 2.376579253 | 0.795 | 0.019 | 0         | 0         |
| 26 | KRT19    | 2.177905186 | 0.762 | 0.034 | 0         | 0         |
| 26 | KRT7     | 1.946993173 | 0.742 | 0.037 | 0         | 0         |
| 26 | AQP5     | 1.799972522 | 0.692 | 0.025 | 0         | 0         |
| 26 | SLC12A2  | 1.619066375 | 0.623 | 0.078 | 0         | 0         |
| 26 | KRT18    | 1.575799633 | 0.703 | 0.076 | 0         | 0         |
| 26 | SNORC    | 1.405049849 | 0.333 | 0.025 | 0         | 0         |
| 26 | PRR4     | 1.272462426 | 0.269 | 0.003 | 0         | 0         |
| 26 | KRT8     | 1.270370483 | 0.619 | 0.061 | 0         | 0         |
| 26 | TSPAN8   | 1.113067719 | 0.599 | 0.066 | 0         | 0         |
| 26 | ATP1B1   | 1.104702505 | 0.576 | 0.136 | 0         | 0         |
| 26 | ZG16B    | 1.097302565 | 0.438 | 0.059 | 0         | 0         |
| 26 | PPP1R1B  | 1.032536438 | 0.559 | 0.021 | 0         | 0         |
| 26 | ELF3     | 0.987478284 | 0.469 | 0.029 | 0         | 0         |
| 26 | C5orf46  | 0.966595749 | 0.527 | 0.022 | 0         | 0         |
| 26 | SERHL2   | 0.953228367 | 0.424 | 0.013 | 0         | 0         |
| 26 | LRRC26   | 0.93564336  | 0.533 | 0.01  | 0         | 0         |
| 26 | CD24     | 0.908768785 | 0.498 | 0.085 | 0         | 0         |
| 26 | CLDN10   | 0.905345454 | 0.282 | 0.015 | 0         | 0         |
| 26 | CALML5   | 0.867491008 | 0.698 | 0.171 | 0         | 0         |
| 26 | SCGB2A1  | 0.768350638 | 0.308 | 0.004 | 0         | 0         |
| 26 | CRACR2B  | 0.74042383  | 0.525 | 0.048 | 0         | 0         |
| 26 | CLDN3    | 0.731513292 | 0.459 | 0.01  | 0         | 0         |
| 26 | SOX9     | 0.728564374 | 0.445 | 0.064 | 0         | 0         |
| 26 | SMIM22   | 0.727708738 | 0.481 | 0.01  | 0         | 0         |
| 26 | CITED4   | 0.714772879 | 0.479 | 0.093 | 0         | 0         |
| 26 | CLDN7    | 0.666057091 | 0.478 | 0.033 | 0         | 0         |
| 26 | CXCL1    | 1.319461108 | 0.341 | 0.07  | 2.65E-207 | 6.30E-203 |
| 26 | XBP1     | 0.847213379 | 0.89  | 0.5   | 1.47E-203 | 3.49E-199 |

|    |          |             |       |       |           |           |
|----|----------|-------------|-------|-------|-----------|-----------|
| 26 | FXD3     | 0.669088323 | 0.964 | 0.484 | 6.08E-185 | 1.45E-180 |
| 26 | SDC4     | 1.215091774 | 0.545 | 0.216 | 1.29E-170 | 3.06E-166 |
| 26 | MT-CO3   | 0.939108735 | 1     | 0.995 | 1.13E-167 | 2.69E-163 |
| 26 | CLDN4    | 0.838741484 | 0.565 | 0.202 | 2.64E-166 | 6.29E-162 |
| 26 | SFRP1    | 1.195073019 | 0.394 | 0.113 | 1.55E-163 | 3.70E-159 |
| 26 | MT-ND4   | 0.936921433 | 1     | 0.995 | 2.64E-163 | 6.27E-159 |
| 26 | ATP1A1   | 0.73295271  | 0.952 | 0.629 | 4.35E-163 | 1.03E-158 |
| 26 | MT-CO2   | 1.004824772 | 1     | 0.995 | 1.64E-154 | 3.91E-150 |
| 26 | MT-CO1   | 0.973621054 | 1     | 0.995 | 5.17E-152 | 1.23E-147 |
| 26 | DBI      | 0.710095936 | 0.976 | 0.75  | 3.43E-141 | 8.16E-137 |
| 26 | MT-ND1   | 0.812724712 | 1     | 0.994 | 2.34E-137 | 5.57E-133 |
| 26 | MT-CYB   | 0.720388639 | 1     | 0.995 | 2.08E-112 | 4.94E-108 |
| 26 | MT-ATP6  | 0.750102327 | 1     | 0.993 | 2.00E-111 | 4.77E-107 |
| 26 | CXCL2    | 0.893015843 | 0.47  | 0.205 | 7.58E-93  | 1.80E-88  |
| 26 | MT-ND3   | 0.714853947 | 1     | 0.992 | 2.86E-89  | 6.80E-85  |
| 27 | HIST1H4C | 2.230176724 | 0.844 | 0.25  | 0         | 0         |
| 27 | KRT5     | 1.531155818 | 0.973 | 0.492 | 0         | 0         |
| 27 | STMN1    | 1.513598936 | 0.96  | 0.299 | 0         | 0         |
| 27 | HMGB2    | 1.462925057 | 0.979 | 0.452 | 0         | 0         |
| 27 | PTTG1    | 1.447670869 | 0.949 | 0.206 | 0         | 0         |
| 27 | UBE2C    | 1.30750392  | 0.854 | 0.018 | 0         | 0         |
| 27 | TUBA1B   | 1.264063105 | 1     | 0.934 | 0         | 0         |
| 27 | NUSAP1   | 1.181576873 | 0.906 | 0.076 | 0         | 0         |
| 27 | PCLAF    | 1.121206108 | 0.729 | 0.03  | 0         | 0         |
| 27 | TOP2A    | 1.116926749 | 0.771 | 0.016 | 0         | 0         |
| 27 | TK1      | 1.07350078  | 0.71  | 0.026 | 0         | 0         |
| 27 | HMGB1    | 1.045089822 | 1     | 0.948 | 0         | 0         |
| 27 | CDK1     | 1.042551433 | 0.804 | 0.022 | 0         | 0         |
| 27 | CENPF    | 1.018762748 | 0.716 | 0.018 | 0         | 0         |
| 27 | CKS1B    | 1.016095596 | 0.919 | 0.265 | 0         | 0         |
| 27 | CDC20    | 0.906613693 | 0.654 | 0.037 | 0         | 0         |
| 27 | SMC4     | 0.885399698 | 0.81  | 0.146 | 0         | 0         |
| 27 | BIRC5    | 0.875405094 | 0.73  | 0.017 | 0         | 0         |
| 27 | CENPW    | 0.868285629 | 0.804 | 0.07  | 0         | 0         |
| 27 | TYMS     | 0.820912008 | 0.65  | 0.037 | 0         | 0         |
| 27 | MT1G     | 0.779203509 | 0.59  | 0.097 | 0         | 0         |
| 27 | CDKN3    | 0.774368321 | 0.629 | 0.02  | 0         | 0         |
| 27 | PHGDH    | 0.773799815 | 0.817 | 0.235 | 0         | 0         |
| 27 | MKI67    | 0.767783404 | 0.651 | 0.01  | 0         | 0         |
| 27 | PBK      | 0.759050303 | 0.666 | 0.007 | 0         | 0         |
| 27 | RRM2     | 0.730691605 | 0.534 | 0.011 | 0         | 0         |
| 27 | CCNB1    | 0.728155395 | 0.529 | 0.043 | 0         | 0         |
| 27 | CCNB2    | 0.703880209 | 0.593 | 0.012 | 0         | 0         |
| 27 | H2AFZ    | 0.914001291 | 1     | 0.827 | 6.31E-280 | 1.50E-275 |
| 27 | HMG2     | 1.016198948 | 0.973 | 0.689 | 1.03E-277 | 2.44E-273 |
| 27 | H2AFV    | 0.679235428 | 0.859 | 0.323 | 3.71E-277 | 8.83E-273 |
| 27 | HINT1    | 0.759065825 | 0.997 | 0.904 | 1.09E-274 | 2.60E-270 |
| 27 | TUBB     | 1.031432882 | 0.991 | 0.845 | 5.45E-258 | 1.30E-253 |
| 27 | PTMA     | 0.725920847 | 1     | 0.997 | 8.90E-252 | 2.12E-247 |
| 27 | S100A2   | 0.999615492 | 0.91  | 0.383 | 2.79E-244 | 6.64E-240 |
| 27 | KRT14    | 1.310968394 | 0.966 | 0.672 | 1.05E-234 | 2.49E-230 |
| 27 | UBE2S    | 0.7206341   | 0.779 | 0.282 | 2.03E-234 | 4.82E-230 |
| 27 | PLP2     | 0.718800523 | 0.976 | 0.676 | 2.38E-233 | 5.66E-229 |
| 27 | S100A14  | 0.951123539 | 0.964 | 0.535 | 1.10E-226 | 2.61E-222 |
| 27 | DEK      | 0.716289879 | 0.897 | 0.488 | 5.54E-221 | 1.32E-216 |
| 27 | PCNA     | 0.743863041 | 0.624 | 0.197 | 2.23E-213 | 5.31E-209 |
| 27 | COL17A1  | 0.710410187 | 0.58  | 0.15  | 1.88E-205 | 4.47E-201 |
| 27 | CKS2     | 0.753482285 | 0.914 | 0.46  | 2.44E-205 | 5.80E-201 |
| 27 | MTIX     | 1.063613134 | 0.967 | 0.749 | 5.48E-200 | 1.30E-195 |
| 27 | SLC25A5  | 0.719561077 | 0.979 | 0.803 | 9.77E-199 | 2.33E-194 |
| 27 | TUBA1C   | 0.732386183 | 0.941 | 0.581 | 1.26E-192 | 3.00E-188 |
| 27 | MT2A     | 0.869235235 | 0.991 | 0.802 | 1.88E-191 | 4.47E-187 |
| 27 | TUBB4B   | 0.746895617 | 0.983 | 0.781 | 1.56E-174 | 3.71E-170 |
| 27 | MT1E     | 0.903087599 | 0.826 | 0.466 | 9.58E-158 | 2.28E-153 |

|    |          |             |       |       |           |           |
|----|----------|-------------|-------|-------|-----------|-----------|
| 27 | KRT17    | 0.674349961 | 0.563 | 0.2   | 4.46E-126 | 1.06E-121 |
| 28 | KRT17    | 3.711891716 | 0.997 | 0.195 | 0         | 0         |
| 28 | S100A2   | 2.177100707 | 0.94  | 0.383 | 0         | 0         |
| 28 | KRT6B    | 2.05260012  | 0.504 | 0.052 | 0         | 0         |
| 28 | GJB6     | 1.194929792 | 0.527 | 0.033 | 0         | 0         |
| 28 | GJB2     | 0.819943915 | 0.509 | 0.066 | 0         | 0         |
| 28 | SOSTDC1  | 0.708111816 | 0.419 | 0.043 | 0         | 0         |
| 28 | SOX9     | 0.702099298 | 0.518 | 0.064 | 0         | 0         |
| 28 | RBP1     | 0.640828396 | 0.5   | 0.075 | 0         | 0         |
| 28 | BARX2    | 0.597521725 | 0.494 | 0.06  | 0         | 0         |
| 28 | C1QTNF12 | 0.56631685  | 0.34  | 0.021 | 0         | 0         |
| 28 | VSNL1    | 0.414586676 | 0.398 | 0.055 | 0         | 0         |
| 28 | KRT5     | 1.457517779 | 0.991 | 0.492 | 3.67E-305 | 8.74E-301 |
| 28 | CALML3   | 1.506500959 | 0.669 | 0.179 | 3.39E-281 | 8.07E-277 |
| 28 | KRT6A    | 1.465946467 | 0.534 | 0.12  | 1.48E-244 | 3.51E-240 |
| 28 | S100A14  | 0.994686434 | 0.967 | 0.535 | 9.65E-221 | 2.30E-216 |
| 28 | KRT14    | 0.877226147 | 0.964 | 0.672 | 7.03E-170 | 1.67E-165 |
| 28 | ABRACL   | 0.552079498 | 0.57  | 0.184 | 4.39E-164 | 1.04E-159 |
| 28 | EGR2     | 0.457148841 | 0.47  | 0.127 | 4.00E-159 | 9.53E-155 |
| 28 | TRIM29   | 0.515722556 | 0.741 | 0.277 | 4.83E-154 | 1.15E-149 |
| 28 | DSG3     | 0.414504846 | 0.482 | 0.135 | 1.99E-151 | 4.74E-147 |
| 28 | PHGDH    | 0.603248237 | 0.627 | 0.238 | 1.15E-143 | 2.73E-139 |
| 28 | EFNA3    | 0.411347481 | 0.549 | 0.181 | 3.66E-137 | 8.70E-133 |
| 28 | CAPNS2   | 0.446636578 | 0.496 | 0.161 | 1.06E-129 | 2.52E-125 |
| 28 | SDC1     | 0.738078767 | 0.593 | 0.231 | 1.73E-123 | 4.11E-119 |
| 28 | HMGA1    | 0.518085841 | 0.696 | 0.302 | 2.70E-122 | 6.42E-118 |
| 28 | PERP     | 0.579237116 | 0.999 | 0.71  | 1.78E-120 | 4.23E-116 |
| 28 | LGALS7B  | 0.839394435 | 0.882 | 0.531 | 8.51E-119 | 2.03E-114 |
| 28 | SPINT2   | 0.513950911 | 0.772 | 0.394 | 1.05E-109 | 2.51E-105 |
| 28 | STMN1    | 0.584345223 | 0.66  | 0.303 | 4.37E-106 | 1.04E-101 |
| 28 | KRT16    | 1.294968658 | 0.448 | 0.151 | 1.86E-104 | 4.44E-100 |
| 28 | LAMB3    | 0.427527862 | 0.337 | 0.094 | 2.54E-104 | 6.04E-100 |
| 28 | DSP      | 0.467751496 | 0.87  | 0.488 | 3.56E-102 | 8.48E-98  |
| 28 | ACTN1    | 0.468227374 | 0.59  | 0.27  | 6.30E-87  | 1.50E-82  |
| 28 | KRT15    | 0.86022152  | 0.481 | 0.185 | 7.12E-86  | 1.69E-81  |
| 28 | DAPL1    | 0.474657163 | 0.602 | 0.271 | 7.37E-85  | 1.75E-80  |
| 28 | APOE     | 0.58786475  | 0.882 | 0.661 | 2.78E-79  | 6.62E-75  |
| 28 | SERPINB5 | 0.454900154 | 0.726 | 0.383 | 2.13E-78  | 5.06E-74  |
| 28 | S100A16  | 0.564012531 | 0.819 | 0.599 | 1.36E-73  | 3.24E-69  |
| 28 | TACSTD2  | 0.575294784 | 0.831 | 0.54  | 5.22E-72  | 1.24E-67  |
| 28 | FST      | 0.602899469 | 0.292 | 0.096 | 3.05E-70  | 7.26E-66  |
| 28 | LGALS7   | 0.669026109 | 0.561 | 0.264 | 1.35E-69  | 3.21E-65  |
| 28 | BTG3     | 0.425568411 | 0.674 | 0.435 | 3.65E-61  | 8.69E-57  |
| 28 | SFRP1    | 0.418710034 | 0.316 | 0.115 | 9.64E-59  | 2.29E-54  |
| 28 | SOX4     | 0.47279428  | 0.576 | 0.404 | 7.73E-34  | 1.84E-29  |
| 28 | TMEM45A  | 0.516976597 | 0.482 | 0.298 | 3.64E-33  | 8.66E-29  |
| 28 | AREG     | 0.425813885 | 0.4   | 0.214 | 6.09E-30  | 1.45E-25  |
| 28 | SPINK5   | 0.695659648 | 0.29  | 0.149 | 6.39E-28  | 1.52E-23  |
| 28 | DST      | 0.471979003 | 0.49  | 0.334 | 3.78E-27  | 9.00E-23  |
| 28 | GJA1     | 0.438194746 | 0.518 | 0.365 | 7.45E-24  | 1.77E-19  |
| 28 | FABP5    | 0.879677361 | 0.638 | 0.537 | 2.23E-21  | 5.30E-17  |
| 29 | DES      | 2.373840879 | 0.902 | 0.04  | 0         | 0         |
| 29 | ACTG2    | 2.185801806 | 0.894 | 0.054 | 0         | 0         |
| 29 | TPM2     | 2.054769126 | 0.964 | 0.224 | 0         | 0         |
| 29 | ACTA2    | 1.946137513 | 0.953 | 0.182 | 0         | 0         |
| 29 | MYLK     | 1.9404481   | 0.842 | 0.142 | 0         | 0         |
| 29 | MYL9     | 1.836657882 | 1     | 0.457 | 0         | 0         |
| 29 | TAGLN    | 1.823354762 | 0.995 | 0.292 | 0         | 0         |
| 29 | MYH11    | 1.823284735 | 0.806 | 0.078 | 0         | 0         |
| 29 | PCP4     | 1.789577052 | 0.722 | 0.017 | 0         | 0         |
| 29 | CNN1     | 1.715094575 | 0.81  | 0.057 | 0         | 0         |
| 29 | CSRP1    | 1.577761868 | 0.837 | 0.257 | 0         | 0         |
| 29 | TPM1     | 1.455350652 | 0.912 | 0.352 | 0         | 0         |
| 29 | ACTA1    | 1.36309124  | 0.492 | 0.012 | 0         | 0         |

|    |          |             |       |       |           |           |
|----|----------|-------------|-------|-------|-----------|-----------|
| 29 | PPP1R14A | 1.294289395 | 0.698 | 0.107 | 0         | 0         |
| 29 | ACTC1    | 0.845420041 | 0.273 | 0.013 | 0         | 0         |
| 29 | ITGA8    | 0.773578967 | 0.382 | 0.032 | 0         | 0         |
| 29 | SYNM     | 0.766807597 | 0.373 | 0.037 | 0         | 0         |
| 29 | FLNC     | 0.741388648 | 0.304 | 0.026 | 0         | 0         |
| 29 | P2RX1    | 0.702836397 | 0.299 | 0.012 | 0         | 0         |
| 29 | SYNPO2   | 1.203298812 | 0.564 | 0.117 | 2.01E-298 | 4.77E-294 |
| 29 | CARMN    | 0.84877877  | 0.355 | 0.046 | 1.49E-289 | 3.56E-285 |
| 29 | PLN      | 0.706174657 | 0.413 | 0.059 | 3.07E-280 | 7.30E-276 |
| 29 | FLNA     | 1.734881127 | 0.833 | 0.36  | 4.49E-270 | 1.07E-265 |
| 29 | PDLIM7   | 1.012647416 | 0.572 | 0.152 | 4.95E-234 | 1.18E-229 |
| 29 | ACTB     | 1.090047139 | 1     | 0.995 | 2.72E-231 | 6.49E-227 |
| 29 | RAMP1    | 0.752685121 | 0.404 | 0.074 | 1.06E-223 | 2.53E-219 |
| 29 | SMTN     | 1.139927393 | 0.619 | 0.21  | 2.00E-206 | 4.76E-202 |
| 29 | PDLIM3   | 0.652228385 | 0.368 | 0.067 | 5.03E-200 | 1.20E-195 |
| 29 | PPP1R12B | 0.718392668 | 0.4   | 0.089 | 9.40E-178 | 2.24E-173 |
| 29 | LMOD1    | 0.657987263 | 0.382 | 0.08  | 7.54E-176 | 1.79E-171 |
| 29 | CALD1    | 0.996218864 | 0.993 | 0.578 | 3.98E-165 | 9.47E-161 |
| 29 | DSTN     | 0.85166021  | 1     | 0.917 | 1.09E-151 | 2.58E-147 |
| 29 | CKB      | 0.819938771 | 0.866 | 0.436 | 1.13E-151 | 2.70E-147 |
| 29 | LPP      | 1.093323174 | 0.552 | 0.215 | 1.44E-144 | 3.42E-140 |
| 29 | SLMAP    | 0.810123425 | 0.446 | 0.14  | 3.82E-138 | 9.09E-134 |
| 29 | CD151    | 0.723822328 | 0.825 | 0.438 | 5.64E-118 | 1.34E-113 |
| 29 | MT-ND4   | 0.992536663 | 0.995 | 0.995 | 1.86E-111 | 4.43E-107 |
| 29 | MYL6     | 0.677844285 | 1     | 0.993 | 5.35E-111 | 1.27E-106 |
| 29 | CFL2     | 0.632723537 | 0.353 | 0.103 | 6.19E-107 | 1.47E-102 |
| 29 | FHL1     | 0.798358298 | 0.578 | 0.263 | 2.87E-106 | 6.83E-102 |
| 29 | MT-ATP6  | 0.850009538 | 0.995 | 0.993 | 3.36E-103 | 7.99E-99  |
| 29 | MT-ND2   | 0.961137468 | 0.997 | 0.995 | 1.10E-102 | 2.61E-98  |
| 29 | ITGB1    | 0.693788044 | 0.925 | 0.549 | 9.44E-98  | 2.25E-93  |
| 29 | MT-CYB   | 0.891134662 | 0.997 | 0.995 | 1.01E-95  | 2.40E-91  |
| 29 | MT-ND3   | 1.016324688 | 0.995 | 0.993 | 3.16E-95  | 7.52E-91  |
| 29 | MT-CO2   | 0.841886069 | 0.997 | 0.995 | 6.58E-82  | 1.57E-77  |
| 29 | FN1      | 0.724229209 | 0.507 | 0.222 | 2.62E-81  | 6.23E-77  |
| 29 | MT-CO3   | 0.840478305 | 0.997 | 0.995 | 6.48E-79  | 1.54E-74  |
| 29 | NDUFA4   | 0.67441362  | 0.992 | 0.877 | 1.20E-74  | 2.85E-70  |
| 29 | ACTN1    | 0.757931718 | 0.49  | 0.271 | 1.97E-66  | 4.70E-62  |
| 30 | FABP4    | 2.447142919 | 1     | 0.132 | 0         | 0         |
| 30 | RBP7     | 1.514226988 | 0.637 | 0.087 | 0         | 0         |
| 30 | CD36     | 1.131317586 | 0.61  | 0.081 | 0         | 0         |
| 30 | CLDN5    | 0.89669015  | 0.529 | 0.087 | 9.68E-298 | 2.30E-293 |
| 30 | TMSB4X   | 0.971097908 | 1     | 0.994 | 8.77E-211 | 2.09E-206 |
| 30 | IFI27    | 0.9794039   | 0.993 | 0.472 | 9.38E-210 | 2.23E-205 |
| 30 | GNG11    | 1.0810824   | 0.689 | 0.264 | 5.21E-173 | 1.24E-168 |
| 30 | TMSB10   | 0.8644489   | 1     | 0.973 | 4.11E-170 | 9.79E-166 |
| 30 | SPARCL1  | 0.552812072 | 0.93  | 0.346 | 6.88E-162 | 1.64E-157 |
| 30 | FABP5    | 0.701661073 | 0.988 | 0.533 | 6.31E-151 | 1.50E-146 |
| 30 | EGFL7    | 0.685706678 | 0.409 | 0.101 | 2.50E-141 | 5.96E-137 |
| 30 | RAMP2    | 0.724519939 | 0.478 | 0.141 | 2.12E-127 | 5.04E-123 |
| 30 | BST2     | 0.774333366 | 0.546 | 0.209 | 8.59E-117 | 2.04E-112 |
| 30 | CAV1     | 0.679021785 | 0.988 | 0.656 | 1.62E-102 | 3.86E-98  |
| 30 | VWF      | 0.511729663 | 0.323 | 0.08  | 1.80E-99  | 4.29E-95  |
| 30 | B2M      | 0.44654389  | 1     | 0.998 | 6.26E-96  | 1.49E-91  |
| 30 | PLVAP    | 0.406955887 | 0.325 | 0.082 | 7.32E-92  | 1.74E-87  |
| 30 | A2M      | 0.642510391 | 0.509 | 0.196 | 1.76E-91  | 4.18E-87  |
| 30 | IGFBP7   | 0.390588281 | 1     | 0.646 | 7.44E-88  | 1.77E-83  |
| 30 | IFITM3   | 0.568383434 | 1     | 0.76  | 1.29E-83  | 3.07E-79  |
| 30 | PECAM1   | 0.471660611 | 0.34  | 0.097 | 1.69E-83  | 4.02E-79  |
| 30 | MYL12A   | 0.573486616 | 1     | 0.837 | 5.73E-81  | 1.36E-76  |
| 30 | ADGRL4   | 0.453086238 | 0.275 | 0.074 | 7.49E-76  | 1.78E-71  |
| 30 | RAMP3    | 0.436727572 | 0.282 | 0.078 | 5.21E-74  | 1.24E-69  |
| 30 | HLA-B    | 0.486367662 | 1     | 0.968 | 8.67E-74  | 2.06E-69  |
| 30 | TXNIP    | 0.455632038 | 0.921 | 0.526 | 1.11E-70  | 2.64E-66  |
| 30 | CRIP2    | 0.446039615 | 0.784 | 0.428 | 1.77E-69  | 4.21E-65  |

|    |          |             |       |       |           |           |
|----|----------|-------------|-------|-------|-----------|-----------|
| 30 | HLA-E    | 0.484793373 | 1     | 0.882 | 2.05E-65  | 4.88E-61  |
| 30 | FKBP1A   | 0.528163448 | 0.985 | 0.687 | 2.67E-65  | 6.35E-61  |
| 30 | ID1      | 0.54354017  | 0.751 | 0.404 | 5.18E-64  | 1.23E-59  |
| 30 | CCDC85B  | 0.445079587 | 0.866 | 0.518 | 1.68E-63  | 4.00E-59  |
| 30 | PCAT19   | 0.367916514 | 0.265 | 0.08  | 2.06E-58  | 4.90E-54  |
| 30 | AQP1     | 0.453749817 | 0.455 | 0.2   | 1.04E-57  | 2.47E-53  |
| 30 | RHOC     | 0.433845041 | 0.881 | 0.561 | 1.36E-52  | 3.24E-48  |
| 30 | IFITM2   | 0.351225141 | 0.952 | 0.558 | 9.35E-52  | 2.23E-47  |
| 30 | HLA-C    | 0.455429073 | 1     | 0.961 | 6.80E-51  | 1.62E-46  |
| 30 | MYL6     | 0.377516507 | 1     | 0.993 | 1.67E-47  | 3.97E-43  |
| 30 | CDC37    | 0.369024823 | 0.808 | 0.519 | 2.93E-43  | 6.98E-39  |
| 30 | SLC9A3R2 | 0.531437482 | 0.347 | 0.168 | 2.73E-41  | 6.49E-37  |
| 30 | COL4A1   | 0.479380431 | 0.323 | 0.149 | 8.58E-40  | 2.04E-35  |
| 30 | ESAM     | 0.404061398 | 0.278 | 0.12  | 2.18E-36  | 5.19E-32  |
| 30 | GMFG     | 0.37864396  | 0.285 | 0.133 | 4.71E-32  | 1.12E-27  |
| 30 | FIS1     | 0.314689751 | 0.773 | 0.523 | 1.93E-30  | 4.59E-26  |
| 30 | SELENOW  | 0.350973975 | 0.971 | 0.74  | 3.94E-28  | 9.37E-24  |
| 30 | COL15A1  | 0.395464143 | 0.311 | 0.163 | 4.40E-27  | 1.05E-22  |
| 30 | VAMP5    | 0.465524391 | 0.405 | 0.28  | 1.33E-24  | 3.17E-20  |
| 30 | ENG      | 0.339509672 | 0.282 | 0.155 | 1.81E-21  | 4.32E-17  |
| 30 | COL4A2   | 0.403388226 | 0.294 | 0.168 | 1.83E-21  | 4.37E-17  |
| 30 | RGCC     | 0.345080218 | 0.373 | 0.238 | 2.41E-20  | 5.75E-16  |
| 30 | MGLL     | 0.372390125 | 0.297 | 0.208 | 3.52E-13  | 8.38E-09  |
| 31 | DCT      | 3.543720778 | 0.955 | 0.008 | 0         | 0         |
| 31 | TYRP1    | 3.295146161 | 0.88  | 0.009 | 0         | 0         |
| 31 | PMEL     | 2.957021293 | 0.869 | 0.015 | 0         | 0         |
| 31 | MLANA    | 2.659096923 | 0.82  | 0.008 | 0         | 0         |
| 31 | QPCT     | 1.499653078 | 0.614 | 0.114 | 0         | 0         |
| 31 | MITF     | 1.471598202 | 0.551 | 0.072 | 0         | 0         |
| 31 | CYB561A3 | 1.278551803 | 0.598 | 0.122 | 0         | 0         |
| 31 | GPM6B    | 1.199047798 | 0.625 | 0.099 | 0         | 0         |
| 31 | MFSD12   | 1.157183784 | 0.544 | 0.052 | 0         | 0         |
| 31 | TRPM1    | 1.13594972  | 0.535 | 0.001 | 0         | 0         |
| 31 | PCSK2    | 1.068397165 | 0.478 | 0.007 | 0         | 0         |
| 31 | BCAN     | 1.047705878 | 0.542 | 0.002 | 0         | 0         |
| 31 | PLP1     | 0.998006921 | 0.519 | 0.058 | 0         | 0         |
| 31 | TYR      | 0.997369257 | 0.504 | 0.001 | 0         | 0         |
| 31 | TUBB2B   | 0.862300394 | 0.377 | 0.043 | 0         | 0         |
| 31 | GMPR     | 0.770958908 | 0.442 | 0.033 | 0         | 0         |
| 31 | SNCA     | 0.759719612 | 0.469 | 0.062 | 0         | 0         |
| 31 | GPR143   | 0.745809027 | 0.422 | 0.002 | 0         | 0         |
| 31 | MCOLN3   | 0.73578809  | 0.364 | 0.018 | 0         | 0         |
| 31 | KIT      | 0.721311451 | 0.409 | 0.013 | 0         | 0         |
| 31 | GPR155   | 0.772542582 | 0.425 | 0.058 | 1.35E-306 | 3.21E-302 |
| 31 | EDNRB    | 0.674292675 | 0.408 | 0.072 | 5.00E-212 | 1.19E-207 |
| 31 | C4orf48  | 0.746585472 | 0.449 | 0.094 | 8.74E-196 | 2.08E-191 |
| 31 | CDC42EP3 | 0.943950045 | 0.522 | 0.132 | 6.61E-186 | 1.57E-181 |
| 31 | PHACTR1  | 0.717738163 | 0.345 | 0.063 | 4.45E-165 | 1.06E-160 |
| 31 | OSTM1    | 0.629765514 | 0.402 | 0.091 | 3.18E-159 | 7.57E-155 |
| 31 | GPNMB    | 1.013872254 | 0.961 | 0.557 | 3.35E-157 | 7.98E-153 |
| 31 | SAT1     | 0.866191185 | 0.993 | 0.791 | 1.12E-144 | 2.67E-140 |
| 31 | CHCHD6   | 0.659326355 | 0.348 | 0.08  | 1.49E-133 | 3.56E-129 |
| 31 | CD59     | 0.928701363 | 0.977 | 0.614 | 6.15E-132 | 1.46E-127 |
| 31 | NSG1     | 0.80057126  | 0.553 | 0.205 | 4.18E-125 | 9.96E-121 |
| 31 | MT-CO3   | 0.929320386 | 0.998 | 0.995 | 4.62E-123 | 1.10E-118 |
| 31 | MT-CYB   | 0.858148299 | 1     | 0.995 | 1.91E-122 | 4.54E-118 |
| 31 | APOE     | 0.78846368  | 0.982 | 0.661 | 4.71E-118 | 1.12E-113 |
| 31 | HMG20B   | 0.854602781 | 0.575 | 0.256 | 1.84E-115 | 4.39E-111 |
| 31 | MT-ND4   | 0.756030321 | 1     | 0.995 | 6.03E-104 | 1.43E-99  |
| 31 | RAB32    | 0.619997711 | 0.388 | 0.118 | 1.23E-101 | 2.94E-97  |
| 31 | SDCBP    | 0.684592382 | 0.93  | 0.546 | 3.09E-101 | 7.35E-97  |
| 31 | FRZB     | 0.700571798 | 0.366 | 0.103 | 1.38E-98  | 3.28E-94  |
| 31 | GSTP1    | 0.948141195 | 0.993 | 0.926 | 1.89E-94  | 4.50E-90  |
| 31 | TFAP2A   | 0.65723883  | 0.472 | 0.185 | 7.49E-92  | 1.78E-87  |

|    |          |             |       |       |           |           |
|----|----------|-------------|-------|-------|-----------|-----------|
| 31 | MT-ATP6  | 0.736159467 | 0.998 | 0.993 | 7.98E-92  | 1.90E-87  |
| 31 | EMP3     | 0.697872952 | 0.777 | 0.412 | 5.34E-90  | 1.27E-85  |
| 31 | MT-CO1   | 0.684340416 | 1     | 0.995 | 2.10E-85  | 4.99E-81  |
| 31 | MT-ND1   | 0.658381343 | 0.998 | 0.994 | 1.07E-80  | 2.55E-76  |
| 31 | MT-ND3   | 0.825430119 | 1     | 0.992 | 8.62E-75  | 2.05E-70  |
| 31 | MT-CO2   | 0.636160001 | 1     | 0.995 | 5.67E-70  | 1.35E-65  |
| 31 | MT-ND2   | 0.623181105 | 1     | 0.995 | 3.95E-68  | 9.40E-64  |
| 31 | ASAH1    | 0.63699143  | 0.51  | 0.291 | 3.95E-57  | 9.41E-53  |
| 31 | TTC3     | 0.646248074 | 0.451 | 0.27  | 6.53E-40  | 1.56E-35  |
| 32 | GNLY     | 2.78164674  | 0.725 | 0.004 | 0         | 0         |
| 32 | NKG7     | 2.667884612 | 0.867 | 0.012 | 0         | 0         |
| 32 | XCL1     | 2.278054512 | 0.459 | 0.003 | 0         | 0         |
| 32 | XCL2     | 2.206819527 | 0.57  | 0.003 | 0         | 0         |
| 32 | CCL5     | 2.129120846 | 0.751 | 0.025 | 0         | 0         |
| 32 | GZMB     | 1.925691361 | 0.679 | 0.004 | 0         | 0         |
| 32 | CCL4     | 1.836714415 | 0.6   | 0.038 | 0         | 0         |
| 32 | SRGN     | 1.770504441 | 0.956 | 0.188 | 0         | 0         |
| 32 | KLRB1    | 1.717719398 | 0.744 | 0.016 | 0         | 0         |
| 32 | CTSW     | 1.616881109 | 0.803 | 0.014 | 0         | 0         |
| 32 | CST7     | 1.509020107 | 0.751 | 0.031 | 0         | 0         |
| 32 | CD69     | 1.351234611 | 0.613 | 0.041 | 0         | 0         |
| 32 | GZMA     | 1.306376764 | 0.585 | 0.01  | 0         | 0         |
| 32 | KLRD1    | 1.288281262 | 0.699 | 0.003 | 0         | 0         |
| 32 | CD7      | 1.264113971 | 0.662 | 0.025 | 0         | 0         |
| 32 | HCST     | 1.229832996 | 0.762 | 0.079 | 0         | 0         |
| 32 | PRF1     | 1.217326806 | 0.57  | 0.003 | 0         | 0         |
| 32 | CORO1A   | 1.20733283  | 0.681 | 0.066 | 0         | 0         |
| 32 | CXCR4    | 1.180529478 | 0.598 | 0.097 | 0         | 0         |
| 32 | CD52     | 0.988827164 | 0.487 | 0.069 | 0         | 0         |
| 32 | TYROBP   | 0.954884495 | 0.661 | 0.072 | 0         | 0         |
| 32 | FGFBP2   | 0.938816322 | 0.393 | 0.024 | 0         | 0         |
| 32 | ITGB2    | 0.919209266 | 0.552 | 0.052 | 0         | 0         |
| 32 | DOK2     | 0.912049021 | 0.544 | 0.05  | 0         | 0         |
| 32 | KLRC1    | 0.87439748  | 0.371 | 0.001 | 0         | 0         |
| 32 | GZMH     | 0.860527006 | 0.428 | 0.003 | 0         | 0         |
| 32 | IFNG     | 0.835273759 | 0.271 | 0.007 | 0         | 0         |
| 32 | RUNX3    | 0.83250099  | 0.518 | 0.049 | 0         | 0         |
| 32 | RAC2     | 0.80453102  | 0.544 | 0.038 | 0         | 0         |
| 32 | GPR65    | 0.79070998  | 0.482 | 0.034 | 0         | 0         |
| 32 | PTPRC    | 0.78979645  | 0.53  | 0.057 | 0         | 0         |
| 32 | FCGR3A   | 0.788168337 | 0.328 | 0.006 | 0         | 0         |
| 32 | DUSP2    | 1.355866927 | 0.732 | 0.188 | 1.56E-284 | 3.71E-280 |
| 32 | CREM     | 1.343080336 | 0.745 | 0.211 | 1.54E-260 | 3.66E-256 |
| 32 | B2M      | 0.971909131 | 1     | 0.998 | 6.47E-234 | 1.54E-229 |
| 32 | ISG20    | 0.788385675 | 0.485 | 0.096 | 5.15E-223 | 1.22E-218 |
| 32 | ARHGDI3  | 0.952881641 | 0.753 | 0.267 | 2.23E-199 | 5.31E-195 |
| 32 | HLA-C    | 0.868484598 | 0.998 | 0.961 | 3.15E-166 | 7.49E-162 |
| 32 | HLA-B    | 0.872563625 | 1     | 0.968 | 1.52E-164 | 3.61E-160 |
| 32 | HLA-A    | 0.835177759 | 1     | 0.966 | 8.79E-164 | 2.09E-159 |
| 32 | IL32     | 1.009652094 | 0.526 | 0.148 | 1.62E-157 | 3.86E-153 |
| 32 | PFN1     | 0.90208893  | 0.998 | 0.966 | 1.77E-156 | 4.20E-152 |
| 32 | CMC1     | 1.013545301 | 0.454 | 0.122 | 9.39E-156 | 2.23E-151 |
| 32 | TMSB4X   | 0.831137592 | 1     | 0.994 | 1.28E-152 | 3.05E-148 |
| 32 | CCL3     | 0.789447456 | 0.275 | 0.043 | 1.92E-145 | 4.58E-141 |
| 32 | BTG1     | 1.043186966 | 0.994 | 0.904 | 2.13E-109 | 5.06E-105 |
| 32 | LITAF    | 0.791435211 | 0.638 | 0.315 | 1.13E-106 | 2.68E-102 |
| 32 | REL      | 1.009960471 | 0.707 | 0.435 | 1.03E-92  | 2.45E-88  |
| 32 | ID2      | 0.893564033 | 0.817 | 0.601 | 1.70E-75  | 4.04E-71  |
| 32 | TNFRSF18 | 0.822719587 | 0.365 | 0.154 | 2.01E-58  | 4.79E-54  |
| 33 | MMP7     | 2.418601245 | 0.736 | 0.014 | 0         | 0         |
| 33 | CALML5   | 2.300392977 | 0.902 | 0.172 | 0         | 0         |
| 33 | KRT6B    | 2.142065723 | 0.845 | 0.05  | 0         | 0         |
| 33 | KRT77    | 1.899764577 | 0.559 | 0.015 | 0         | 0         |
| 33 | S100P    | 1.810843326 | 0.672 | 0.011 | 0         | 0         |

|    |          |             |       |       |           |           |
|----|----------|-------------|-------|-------|-----------|-----------|
| 33 | CRABP2   | 1.742712387 | 0.858 | 0.274 | 0         | 0         |
| 33 | KRT6A    | 1.611909751 | 0.803 | 0.118 | 0         | 0         |
| 33 | KRT16    | 1.535272125 | 0.71  | 0.149 | 0         | 0         |
| 33 | GJB2     | 1.357447904 | 0.572 | 0.066 | 0         | 0         |
| 33 | CLIC3    | 1.311302769 | 0.625 | 0.067 | 0         | 0         |
| 33 | WFDC3    | 1.279203853 | 0.47  | 0.007 | 0         | 0         |
| 33 | KRT19    | 1.12782246  | 0.47  | 0.041 | 0         | 0         |
| 33 | CD24     | 1.051325281 | 0.555 | 0.087 | 0         | 0         |
| 33 | GABRP    | 1.039461652 | 0.352 | 0.005 | 0         | 0         |
| 33 | HSD11B2  | 1.037449161 | 0.439 | 0.023 | 0         | 0         |
| 33 | CNFN     | 0.982055035 | 0.446 | 0.045 | 0         | 0         |
| 33 | KRT23    | 0.972384356 | 0.496 | 0.028 | 0         | 0         |
| 33 | GJB6     | 0.949194943 | 0.445 | 0.035 | 0         | 0         |
| 33 | MIA      | 0.947258834 | 0.428 | 0.015 | 0         | 0         |
| 33 | SPTSSB   | 0.83441039  | 0.487 | 0.046 | 0         | 0         |
| 33 | SCGB1D2  | 0.81286839  | 0.435 | 0.034 | 0         | 0         |
| 33 | FXYD3    | 1.352657478 | 0.998 | 0.486 | 7.49E-256 | 1.78E-251 |
| 33 | C19orf33 | 1.263111888 | 0.911 | 0.344 | 1.07E-250 | 2.56E-246 |
| 33 | COX6A1   | 0.969709185 | 1     | 0.876 | 6.27E-172 | 1.49E-167 |
| 33 | QPCT     | 0.734840569 | 0.476 | 0.116 | 1.39E-167 | 3.31E-163 |
| 33 | RHOV     | 0.824742985 | 0.596 | 0.192 | 2.00E-158 | 4.75E-154 |
| 33 | COX4I1   | 0.868214124 | 1     | 0.967 | 2.20E-155 | 5.24E-151 |
| 33 | CLTB     | 0.954531088 | 0.987 | 0.662 | 2.18E-152 | 5.18E-148 |
| 33 | NOV      | 0.74533392  | 0.386 | 0.084 | 9.77E-152 | 2.33E-147 |
| 33 | SPINT1   | 0.991704897 | 0.528 | 0.173 | 6.85E-150 | 1.63E-145 |
| 33 | COX7A2   | 0.941593412 | 0.996 | 0.863 | 1.89E-149 | 4.51E-145 |
| 33 | DEFB1    | 1.117265432 | 0.581 | 0.198 | 5.54E-149 | 1.32E-144 |
| 33 | NDUFA4   | 0.839980003 | 0.996 | 0.877 | 1.51E-145 | 3.58E-141 |
| 33 | CTSD     | 0.875261449 | 0.919 | 0.499 | 4.23E-145 | 1.01E-140 |
| 33 | CD9      | 0.831408224 | 1     | 0.853 | 6.49E-139 | 1.54E-134 |
| 33 | COX5B    | 0.858618274 | 0.985 | 0.858 | 2.61E-136 | 6.22E-132 |
| 33 | COX6C    | 0.820989982 | 0.998 | 0.923 | 3.71E-136 | 8.84E-132 |
| 33 | COX7C    | 0.770038612 | 0.998 | 0.951 | 2.53E-133 | 6.03E-129 |
| 33 | COX8A    | 0.796154339 | 0.989 | 0.744 | 7.07E-131 | 1.68E-126 |
| 33 | ATP1B1   | 0.727116955 | 0.467 | 0.139 | 3.65E-122 | 8.68E-118 |
| 33 | UQCRB    | 0.80149355  | 0.985 | 0.861 | 1.20E-121 | 2.85E-117 |
| 33 | LGALS3   | 0.734729708 | 1     | 0.937 | 2.43E-113 | 5.79E-109 |
| 33 | NDUFA1   | 0.722441212 | 0.959 | 0.683 | 6.25E-107 | 1.49E-102 |
| 33 | COX7B    | 0.763035454 | 0.965 | 0.723 | 1.80E-104 | 4.29E-100 |
| 33 | UQCRQ    | 0.763058289 | 0.983 | 0.765 | 1.16E-100 | 2.76E-96  |
| 33 | NDUFB2   | 0.729945167 | 0.954 | 0.661 | 6.39E-100 | 1.52E-95  |
| 33 | SLC25A5  | 0.700083808 | 0.989 | 0.804 | 1.71E-99  | 4.07E-95  |
| 33 | UQCR11   | 0.733657005 | 0.982 | 0.733 | 4.81E-96  | 1.14E-91  |
| 33 | CHCHD10  | 0.706755545 | 0.574 | 0.334 | 2.19E-69  | 5.20E-65  |
| 33 | CSTA     | 0.818804092 | 0.485 | 0.264 | 5.12E-47  | 1.22E-42  |
| 34 | CCL21    | 3.787632258 | 0.868 | 0.021 | 0         | 0         |
| 34 | TFF3     | 2.921617146 | 0.9   | 0.005 | 0         | 0         |
| 34 | TFPI     | 1.77641098  | 0.787 | 0.168 | 0         | 0         |
| 34 | GNG11    | 1.676360219 | 0.863 | 0.263 | 0         | 0         |
| 34 | CLDN5    | 1.666213057 | 0.796 | 0.084 | 0         | 0         |
| 34 | ANGPT2   | 1.510682045 | 0.616 | 0.102 | 0         | 0         |
| 34 | MMRN1    | 1.454539541 | 0.653 | 0.018 | 0         | 0         |
| 34 | FABP4    | 1.316217944 | 0.839 | 0.134 | 0         | 0         |
| 34 | ECSCR    | 1.287961032 | 0.664 | 0.079 | 0         | 0         |
| 34 | RAMP2    | 1.25391259  | 0.727 | 0.139 | 0         | 0         |
| 34 | LYVE1    | 1.244656783 | 0.529 | 0.009 | 0         | 0         |
| 34 | LAPTM5   | 1.226876788 | 0.664 | 0.104 | 0         | 0         |
| 34 | CAVIN2   | 1.224055039 | 0.599 | 0.069 | 0         | 0         |
| 34 | PPFIBP1  | 1.097419642 | 0.618 | 0.108 | 0         | 0         |
| 34 | EGFL7    | 1.087899345 | 0.675 | 0.098 | 0         | 0         |
| 34 | PCAT19   | 0.84804836  | 0.577 | 0.077 | 0         | 0         |
| 34 | FXYD6    | 0.783092084 | 0.482 | 0.068 | 0         | 0         |
| 34 | KANK3    | 0.766887161 | 0.494 | 0.05  | 0         | 0         |
| 34 | PROX1    | 0.763104455 | 0.451 | 0.01  | 0         | 0         |

|    |          |             |       |       |           |           |
|----|----------|-------------|-------|-------|-----------|-----------|
| 34 | PTX3     | 0.742485843 | 0.423 | 0.02  | 0         | 0         |
| 34 | PDPN     | 0.738372116 | 0.464 | 0.064 | 0         | 0         |
| 34 | TM4SF18  | 0.703352019 | 0.484 | 0.053 | 0         | 0         |
| 34 | TIE1     | 0.70144159  | 0.475 | 0.038 | 0         | 0         |
| 34 | LMO2     | 0.925497539 | 0.464 | 0.068 | 1.41E-305 | 3.36E-301 |
| 34 | SNCG     | 1.146589384 | 0.659 | 0.138 | 2.45E-296 | 5.82E-292 |
| 34 | TM4SF1   | 0.859599852 | 0.904 | 0.29  | 3.97E-248 | 9.45E-244 |
| 34 | NRP2     | 0.711756706 | 0.453 | 0.082 | 9.41E-228 | 2.24E-223 |
| 34 | HYAL2    | 0.832221662 | 0.506 | 0.113 | 2.41E-205 | 5.73E-201 |
| 34 | ELK3     | 0.724899073 | 0.475 | 0.105 | 5.01E-193 | 1.19E-188 |
| 34 | GYPC     | 1.048858264 | 0.677 | 0.233 | 2.16E-191 | 5.15E-187 |
| 34 | IGFBP7   | 1.194394648 | 0.998 | 0.646 | 6.10E-185 | 1.45E-180 |
| 34 | TMSB10   | 0.906636115 | 1     | 0.973 | 1.68E-175 | 4.00E-171 |
| 34 | S100A10  | 0.845777213 | 1     | 0.896 | 3.26E-152 | 7.77E-148 |
| 34 | ARHGAP29 | 0.719356289 | 0.56  | 0.174 | 9.70E-151 | 2.31E-146 |
| 34 | ATP5F1E  | 0.800524636 | 0.998 | 0.958 | 7.59E-146 | 1.81E-141 |
| 34 | FN1      | 0.93281648  | 0.622 | 0.221 | 2.36E-136 | 5.62E-132 |
| 34 | APP      | 0.7724002   | 0.866 | 0.482 | 9.85E-133 | 2.34E-128 |
| 34 | FABP5    | 0.725207636 | 0.946 | 0.534 | 1.63E-130 | 3.88E-126 |
| 34 | SOX4     | 1.108268916 | 0.807 | 0.402 | 6.85E-129 | 1.63E-124 |
| 34 | GNAS     | 0.839930327 | 0.937 | 0.64  | 7.29E-129 | 1.74E-124 |
| 34 | CRIP2    | 0.728643878 | 0.846 | 0.427 | 2.89E-126 | 6.88E-122 |
| 34 | TIMP3    | 0.7098244   | 0.837 | 0.395 | 3.61E-121 | 8.58E-117 |
| 34 | VIM      | 0.835799029 | 1     | 0.711 | 3.17E-118 | 7.55E-114 |
| 34 | RAB11A   | 0.661827357 | 0.853 | 0.501 | 9.39E-117 | 2.23E-112 |
| 34 | HLA-E    | 0.722983127 | 0.996 | 0.882 | 4.16E-112 | 9.91E-108 |
| 34 | LIMS1    | 0.700431932 | 0.544 | 0.22  | 3.30E-106 | 7.85E-102 |
| 34 | CD59     | 0.657360185 | 0.942 | 0.614 | 1.79E-98  | 4.25E-94  |
| 34 | CD9      | 0.73173519  | 0.991 | 0.853 | 3.29E-88  | 7.83E-84  |
| 34 | STMN1    | 0.669963326 | 0.605 | 0.304 | 4.22E-80  | 1.00E-75  |
| 34 | EFEMP1   | 0.840029648 | 0.508 | 0.209 | 1.21E-73  | 2.89E-69  |
| 35 | GPM6B    | 2.009057061 | 0.852 | 0.097 | 0         | 0         |
| 35 | S100B    | 1.928385347 | 0.739 | 0.018 | 0         | 0         |
| 35 | PLP1     | 1.690902968 | 0.722 | 0.056 | 0         | 0         |
| 35 | CDH19    | 1.459282141 | 0.682 | 0.004 | 0         | 0         |
| 35 | SCN7A    | 1.343229973 | 0.593 | 0.008 | 0         | 0         |
| 35 | SEMA3B   | 1.25019197  | 0.627 | 0.042 | 0         | 0         |
| 35 | MPZ      | 1.151512118 | 0.508 | 0.005 | 0         | 0         |
| 35 | NRXN1    | 1.150922009 | 0.581 | 0.001 | 0         | 0         |
| 35 | GFRA3    | 1.142400045 | 0.504 | 0.002 | 0         | 0         |
| 35 | LGI4     | 1.10493609  | 0.562 | 0.068 | 0         | 0         |
| 35 | PCSK2    | 1.09346059  | 0.443 | 0.007 | 0         | 0         |
| 35 | NTM      | 0.785911691 | 0.384 | 0.023 | 0         | 0         |
| 35 | PMP2     | 0.777112724 | 0.324 | 0.003 | 0         | 0         |
| 35 | SOX2     | 0.731561351 | 0.381 | 0.007 | 0         | 0         |
| 35 | L1CAM    | 0.71930895  | 0.379 | 0.007 | 0         | 0         |
| 35 | PLAT     | 0.686847306 | 0.373 | 0.041 | 0         | 0         |
| 35 | COL9A3   | 0.659826508 | 0.35  | 0.026 | 0         | 0         |
| 35 | MAL      | 0.651503841 | 0.381 | 0.013 | 0         | 0         |
| 35 | VWA1     | 1.26902954  | 0.593 | 0.116 | 2.36E-304 | 5.61E-300 |
| 35 | HSPA12A  | 0.648836485 | 0.348 | 0.04  | 4.41E-285 | 1.05E-280 |
| 35 | PMP22    | 1.503825132 | 0.932 | 0.375 | 6.83E-269 | 1.63E-264 |
| 35 | CADM1    | 0.810498181 | 0.434 | 0.069 | 3.64E-260 | 8.66E-256 |
| 35 | CADM3    | 0.719035805 | 0.36  | 0.045 | 3.21E-259 | 7.64E-255 |
| 35 | TUBB2B   | 0.70488406  | 0.333 | 0.044 | 3.22E-230 | 7.67E-226 |
| 35 | CRYAB    | 1.781762761 | 0.951 | 0.443 | 9.78E-227 | 2.33E-222 |
| 35 | MATN2    | 1.05726672  | 0.504 | 0.117 | 3.41E-206 | 8.11E-202 |
| 35 | CLU      | 1.053755305 | 0.892 | 0.352 | 1.60E-184 | 3.81E-180 |
| 35 | CD9      | 1.179811225 | 0.998 | 0.853 | 1.31E-181 | 3.13E-177 |
| 35 | NGFR     | 0.682540424 | 0.348 | 0.059 | 4.61E-180 | 1.10E-175 |
| 35 | PRNP     | 1.135736709 | 0.93  | 0.547 | 8.65E-147 | 2.06E-142 |
| 35 | FXD1     | 1.037195454 | 0.633 | 0.245 | 9.03E-145 | 2.15E-140 |
| 35 | NDRG2    | 1.075499701 | 0.597 | 0.233 | 8.53E-140 | 2.03E-135 |
| 35 | TMEM176B | 0.78769266  | 0.504 | 0.156 | 6.42E-127 | 1.53E-122 |

|    |         |             |       |       |           |           |
|----|---------|-------------|-------|-------|-----------|-----------|
| 35 | TUBA1A  | 0.935506928 | 0.985 | 0.673 | 4.26E-115 | 1.01E-110 |
| 35 | RARRES2 | 0.727987791 | 0.542 | 0.196 | 5.54E-105 | 1.32E-100 |
| 35 | CD59    | 0.726574335 | 0.958 | 0.614 | 2.01E-101 | 4.78E-97  |
| 35 | S100A10 | 0.659312797 | 1     | 0.896 | 1.84E-100 | 4.39E-96  |
| 35 | NRN1    | 0.725278788 | 0.462 | 0.164 | 2.05E-96  | 4.89E-92  |
| 35 | CNN3    | 0.847691092 | 0.612 | 0.33  | 1.46E-87  | 3.48E-83  |
| 35 | VIM     | 0.66681138  | 1     | 0.711 | 9.22E-87  | 2.20E-82  |
| 35 | LTBP4   | 0.765230649 | 0.506 | 0.216 | 7.71E-86  | 1.83E-81  |
| 35 | RHOB    | 0.658495799 | 0.862 | 0.519 | 1.35E-78  | 3.22E-74  |
| 35 | AP1S2   | 0.664987873 | 0.445 | 0.185 | 5.35E-75  | 1.27E-70  |
| 35 | PEBP1   | 0.660849856 | 0.992 | 0.822 | 3.46E-74  | 8.24E-70  |
| 35 | CLIC4   | 0.691633562 | 0.473 | 0.216 | 1.04E-71  | 2.48E-67  |
| 35 | DKK3    | 0.804705362 | 0.439 | 0.186 | 1.32E-71  | 3.14E-67  |
| 35 | PDLIM4  | 0.658918963 | 0.46  | 0.225 | 8.77E-63  | 2.09E-58  |
| 35 | S100A4  | 0.787427809 | 0.972 | 0.675 | 1.43E-59  | 3.40E-55  |
| 35 | PLPP1   | 0.661726413 | 0.413 | 0.202 | 1.02E-49  | 2.43E-45  |
| 35 | FOS     | 0.647695755 | 0.985 | 0.787 | 1.37E-33  | 3.25E-29  |
| 36 | COCH    | 4.587863498 | 0.98  | 0.012 | 0         | 0         |
| 36 | ASPN    | 2.093967515 | 0.919 | 0.113 | 0         | 0         |
| 36 | OGN     | 1.430011083 | 0.853 | 0.07  | 0         | 0         |
| 36 | CRABP1  | 1.413014211 | 0.777 | 0.018 | 0         | 0         |
| 36 | TNN     | 1.375056253 | 0.77  | 0.013 | 0         | 0         |
| 36 | TNMD    | 1.33576949  | 0.639 | 0.032 | 0         | 0         |
| 36 | CTSK    | 1.30938624  | 0.965 | 0.212 | 0         | 0         |
| 36 | CYP1B1  | 1.266863792 | 0.702 | 0.104 | 0         | 0         |
| 36 | FIBIN   | 1.221337254 | 0.753 | 0.057 | 0         | 0         |
| 36 | PLXDC1  | 1.177110388 | 0.716 | 0.074 | 0         | 0         |
| 36 | FMOD    | 1.092314116 | 0.751 | 0.124 | 0         | 0         |
| 36 | PRELP   | 1.068638136 | 0.766 | 0.133 | 0         | 0         |
| 36 | PLPP5   | 1.068631172 | 0.628 | 0.075 | 0         | 0         |
| 36 | EMID1   | 0.971339622 | 0.674 | 0.05  | 0         | 0         |
| 36 | F13A1   | 0.829924394 | 0.606 | 0.056 | 0         | 0         |
| 36 | DKK2    | 0.827060358 | 0.637 | 0.071 | 0         | 0         |
| 36 | SLITRK6 | 0.79326617  | 0.414 | 0.009 | 0         | 0         |
| 36 | LTBP4   | 1.226312451 | 0.832 | 0.214 | 2.64E-306 | 6.29E-302 |
| 36 | IGFBP5  | 1.753557199 | 0.882 | 0.237 | 1.34E-299 | 3.19E-295 |
| 36 | MMP23B  | 0.7696756   | 0.663 | 0.118 | 1.31E-287 | 3.12E-283 |
| 36 | PTGDS   | 1.282483474 | 0.923 | 0.264 | 1.40E-272 | 3.34E-268 |
| 36 | TWIST2  | 1.041087316 | 0.729 | 0.152 | 5.80E-272 | 1.38E-267 |
| 36 | MEG3    | 0.910712478 | 0.794 | 0.184 | 5.19E-247 | 1.23E-242 |
| 36 | FN1     | 0.938859311 | 0.829 | 0.22  | 1.98E-241 | 4.70E-237 |
| 36 | DPT     | 1.200670257 | 0.748 | 0.172 | 1.12E-240 | 2.67E-236 |
| 36 | HTRA1   | 1.268294596 | 0.888 | 0.276 | 1.81E-240 | 4.30E-236 |
| 36 | ANGPTL2 | 0.98914892  | 0.685 | 0.161 | 5.00E-235 | 1.19E-230 |
| 36 | MXRA5   | 0.808333602 | 0.621 | 0.133 | 6.25E-229 | 1.49E-224 |
| 36 | TCF4    | 1.171514817 | 0.875 | 0.332 | 1.44E-217 | 3.43E-213 |
| 36 | MFAP4   | 1.270502212 | 0.877 | 0.276 | 8.11E-216 | 1.93E-211 |
| 36 | SPARCL1 | 1.256182024 | 0.937 | 0.347 | 2.79E-209 | 6.64E-205 |
| 36 | COL1A2  | 1.064465458 | 0.996 | 0.478 | 2.52E-204 | 6.01E-200 |
| 36 | PCOLCE  | 0.964442223 | 0.915 | 0.321 | 2.48E-198 | 5.89E-194 |
| 36 | THY1    | 0.824925623 | 0.805 | 0.214 | 6.43E-198 | 1.53E-193 |
| 36 | COL1A1  | 0.853076187 | 0.991 | 0.49  | 5.32E-197 | 1.27E-192 |
| 36 | ZBTB20  | 0.902884268 | 0.814 | 0.3   | 6.07E-187 | 1.45E-182 |
| 36 | PGRMC1  | 0.977233779 | 0.775 | 0.296 | 2.85E-179 | 6.78E-175 |
| 36 | TIMP2   | 0.783409934 | 0.827 | 0.287 | 5.85E-168 | 1.39E-163 |
| 36 | SOD3    | 0.956198455 | 0.93  | 0.397 | 7.36E-164 | 1.75E-159 |
| 36 | SELENOP | 0.935136041 | 0.972 | 0.634 | 5.59E-162 | 1.33E-157 |
| 36 | S100A6  | 0.914219191 | 1     | 0.826 | 1.15E-157 | 2.74E-153 |
| 36 | EID1    | 0.846773542 | 0.969 | 0.676 | 3.26E-157 | 7.75E-153 |
| 36 | DCN     | 0.827337175 | 0.996 | 0.561 | 1.83E-154 | 4.35E-150 |
| 36 | LUM     | 1.056753279 | 0.823 | 0.307 | 7.58E-154 | 1.80E-149 |
| 36 | PMP22   | 0.832707256 | 0.867 | 0.376 | 1.59E-149 | 3.77E-145 |
| 36 | LGALS1  | 0.912810977 | 1     | 0.672 | 4.60E-149 | 1.09E-144 |
| 36 | S100A10 | 0.905465304 | 0.998 | 0.896 | 4.53E-147 | 1.08E-142 |

|    |          |             |       |       |           |           |
|----|----------|-------------|-------|-------|-----------|-----------|
| 36 | CRABP2   | 0.808207809 | 0.748 | 0.276 | 3.05E-140 | 7.26E-136 |
| 36 | FBLN1    | 0.783660549 | 0.814 | 0.311 | 5.63E-136 | 1.34E-131 |
| 36 | MFGE8    | 0.817145817 | 0.735 | 0.366 | 5.93E-87  | 1.41E-82  |
| 37 | DES      | 4.284391208 | 1     | 0.042 | 0         | 0         |
| 37 | ACTG2    | 3.867379452 | 0.998 | 0.056 | 0         | 0         |
| 37 | TPM2     | 3.479176231 | 1     | 0.226 | 0         | 0         |
| 37 | MYLK     | 3.394203876 | 1     | 0.143 | 0         | 0         |
| 37 | TAGLN    | 3.30341389  | 1     | 0.294 | 0         | 0         |
| 37 | ACTA2    | 3.14753383  | 1     | 0.184 | 0         | 0         |
| 37 | PCP4     | 3.124362747 | 0.991 | 0.017 | 0         | 0         |
| 37 | MYL9     | 3.083517273 | 1     | 0.458 | 0         | 0         |
| 37 | CNN1     | 3.036054118 | 1     | 0.058 | 0         | 0         |
| 37 | MYH11    | 2.955725941 | 1     | 0.078 | 0         | 0         |
| 37 | TPM1     | 2.823991083 | 1     | 0.353 | 0         | 0         |
| 37 | CSRP1    | 2.696724226 | 1     | 0.258 | 0         | 0         |
| 37 | ACTA1    | 2.425390955 | 0.899 | 0.01  | 0         | 0         |
| 37 | PPP1R14A | 2.395470753 | 0.998 | 0.106 | 0         | 0         |
| 37 | FLNA     | 2.310710265 | 0.995 | 0.36  | 0         | 0         |
| 37 | SYNPO2   | 2.296828007 | 0.984 | 0.115 | 0         | 0         |
| 37 | LPP      | 1.984260224 | 0.982 | 0.213 | 0         | 0         |
| 37 | ACTC1    | 1.948728633 | 0.624 | 0.011 | 0         | 0         |
| 37 | SMTN     | 1.940001005 | 0.982 | 0.209 | 0         | 0         |
| 37 | PDLIM7   | 1.86699841  | 0.995 | 0.15  | 0         | 0         |
| 37 | PLN      | 1.713894912 | 0.961 | 0.056 | 0         | 0         |
| 37 | ACTN1    | 1.68966222  | 0.982 | 0.268 | 0         | 0         |
| 37 | FHL1     | 1.662564118 | 0.982 | 0.26  | 0         | 0         |
| 37 | SYNM     | 1.647633015 | 0.904 | 0.034 | 0         | 0         |
| 37 | SLMAP    | 1.60876428  | 0.954 | 0.137 | 0         | 0         |
| 37 | RAMP1    | 1.552676012 | 0.936 | 0.071 | 0         | 0         |
| 37 | CFL2     | 1.53186779  | 0.945 | 0.099 | 0         | 0         |
| 37 | LMOD1    | 1.47211917  | 0.954 | 0.076 | 0         | 0         |
| 37 | ITGA8    | 1.454206015 | 0.869 | 0.029 | 0         | 0         |
| 37 | PALLD    | 1.42718913  | 0.943 | 0.226 | 0         | 0         |
| 37 | NEXN     | 1.414221586 | 0.911 | 0.089 | 0         | 0         |
| 37 | ILK      | 1.387080092 | 0.952 | 0.26  | 0         | 0         |
| 37 | FLNC     | 1.377895025 | 0.849 | 0.022 | 0         | 0         |
| 37 | PPP1R12B | 1.373168148 | 0.936 | 0.086 | 0         | 0         |
| 37 | ALDH1B1  | 1.37288892  | 0.826 | 0.023 | 0         | 0         |
| 37 | SCRG1    | 1.326032728 | 0.745 | 0.017 | 0         | 0         |
| 37 | SORBS2   | 1.311658242 | 0.849 | 0.086 | 0         | 0         |
| 37 | PDLIM3   | 1.287276682 | 0.915 | 0.064 | 0         | 0         |
| 37 | SORBS1   | 1.268101776 | 0.897 | 0.045 | 0         | 0         |
| 37 | TNS1     | 1.223795261 | 0.911 | 0.137 | 0         | 0         |
| 37 | CKB      | 1.67434781  | 0.986 | 0.436 | 9.98E-306 | 2.37E-301 |
| 37 | FN1      | 1.245146484 | 0.908 | 0.219 | 1.05E-303 | 2.49E-299 |
| 37 | CALD1    | 1.929357798 | 0.995 | 0.579 | 1.31E-281 | 3.11E-277 |
| 37 | ACTB     | 1.724710465 | 1     | 0.995 | 5.66E-270 | 1.35E-265 |
| 37 | DSTN     | 1.647221248 | 1     | 0.917 | 3.59E-264 | 8.56E-260 |
| 37 | MYL6     | 1.29358052  | 1     | 0.993 | 2.42E-261 | 5.76E-257 |
| 37 | NDUFA4   | 1.356294227 | 1     | 0.877 | 6.93E-251 | 1.65E-246 |
| 37 | CD151    | 1.295157997 | 0.966 | 0.438 | 1.50E-247 | 3.58E-243 |
| 37 | ITGB1    | 1.34635313  | 0.989 | 0.55  | 8.84E-247 | 2.10E-242 |
| 37 | SELENOM  | 1.284396491 | 0.982 | 0.486 | 1.79E-219 | 4.26E-215 |
| 38 | MALAT1   | 1.75317808  | 1     | 0.997 | 6.10E-217 | 1.45E-212 |
| 38 | NEAT1    | 1.61107729  | 0.995 | 0.959 | 4.10E-133 | 9.76E-129 |
| 38 | LYPD3    | 0.370556623 | 0.95  | 0.456 | 4.78E-70  | 1.14E-65  |
| 38 | CSNK1A1  | 0.58407531  | 0.913 | 0.597 | 2.00E-48  | 4.75E-44  |
| 38 | CCNLI    | 0.553732807 | 0.945 | 0.638 | 2.40E-46  | 5.71E-42  |
| 38 | HNRNPH1  | 0.543060378 | 0.926 | 0.586 | 4.33E-44  | 1.03E-39  |
| 38 | XIST     | 0.794581298 | 0.685 | 0.451 | 3.86E-42  | 9.19E-38  |
| 38 | CD44     | 0.699953721 | 0.975 | 0.784 | 5.69E-41  | 1.35E-36  |
| 38 | SAT1     | 1.040669043 | 0.985 | 0.792 | 2.31E-40  | 5.49E-36  |
| 38 | ATP1A1   | 0.536762799 | 0.948 | 0.632 | 2.28E-37  | 5.42E-33  |
| 38 | EIF5B    | 0.580864014 | 0.811 | 0.561 | 1.12E-36  | 2.67E-32  |

|    |             |             |       |       |             |             |
|----|-------------|-------------|-------|-------|-------------|-------------|
| 38 | CD55        | 0.443635994 | 0.797 | 0.481 | 3.27E-33    | 7.77E-29    |
| 38 | INTS6       | 0.571109989 | 0.727 | 0.481 | 4.11E-33    | 9.77E-29    |
| 38 | TRA2B       | 0.493680465 | 0.734 | 0.525 | 4.98E-30    | 1.18E-25    |
| 38 | REL         | 0.360602768 | 0.705 | 0.436 | 1.02E-29    | 2.44E-25    |
| 38 | BAZ1A       | 0.391433921 | 0.725 | 0.456 | 5.80E-29    | 1.38E-24    |
| 38 | EMP2        | 0.366465577 | 0.888 | 0.563 | 7.69E-29    | 1.83E-24    |
| 38 | HNRNPDL     | 0.405892881 | 0.968 | 0.712 | 7.06E-28    | 1.68E-23    |
| 38 | SLC38A2     | 0.414465993 | 0.983 | 0.687 | 4.97E-27    | 1.18E-22    |
| 38 | FUS         | 0.448242606 | 0.99  | 0.76  | 2.82E-26    | 6.71E-22    |
| 38 | SRSF2       | 0.593906271 | 0.99  | 0.789 | 4.30E-26    | 1.02E-21    |
| 38 | SRSF5       | 0.365831095 | 0.918 | 0.64  | 9.22E-26    | 2.19E-21    |
| 38 | DNAJB6      | 0.418766482 | 0.99  | 0.725 | 1.36E-25    | 3.24E-21    |
| 38 | CLDN4       | 0.568485908 | 0.377 | 0.207 | 4.07E-23    | 9.69E-19    |
| 38 | LMNA        | 0.376738957 | 0.995 | 0.961 | 1.13E-22    | 2.70E-18    |
| 38 | LUC7L3      | 0.417416478 | 0.615 | 0.451 | 4.25E-21    | 1.01E-16    |
| 38 | KLF6        | 0.363562293 | 0.973 | 0.708 | 7.45E-21    | 1.77E-16    |
| 38 | TAF1D       | 0.567456766 | 0.496 | 0.386 | 6.25E-20    | 1.49E-15    |
| 38 | PNISR       | 0.40133791  | 0.648 | 0.489 | 6.64E-20    | 1.58E-15    |
| 38 | AC020916.1  | 0.678832942 | 0.375 | 0.251 | 8.68E-19    | 2.07E-14    |
| 38 | HES1        | 0.518836164 | 0.963 | 0.598 | 1.34E-16    | 3.18E-12    |
| 38 | LDLR        | 0.486587773 | 0.278 | 0.175 | 6.59E-14    | 1.57E-09    |
| 38 | CCNL2       | 0.38656187  | 0.268 | 0.173 | 2.87E-12    | 6.83E-08    |
| 38 | EHF         | 0.436306056 | 0.28  | 0.182 | 7.80E-12    | 1.86E-07    |
| 38 | SRRM2       | 0.380764003 | 0.553 | 0.469 | 5.49E-10    | 1.31E-05    |
| 38 | EPHA2       | 0.389430908 | 0.293 | 0.213 | 3.94E-09    | 9.38E-05    |
| 38 | NXF1        | 0.520932851 | 0.347 | 0.296 | 8.29E-09    | 0.000197379 |
| 38 | IER2        | 0.374057387 | 0.995 | 0.809 | 3.53E-08    | 0.000839224 |
| 38 | THUMPD3-AS1 | 0.497189123 | 0.32  | 0.27  | 7.51E-08    | 0.001787626 |
| 38 | IVNS1ABP    | 0.374774642 | 0.275 | 0.208 | 8.71E-08    | 0.002072757 |
| 38 | KCNQ1OT1    | 0.437881491 | 0.305 | 0.25  | 4.45E-07    | 0.010598143 |
| 38 | MACF1       | 0.37765524  | 0.27  | 0.22  | 1.48E-06    | 0.035219248 |
| 38 | JUN         | 0.374136961 | 0.998 | 0.86  | 1.98E-06    | 0.047043082 |
| 38 | ABHD5       | 0.457923509 | 0.345 | 0.317 | 6.91E-06    | 0.164347258 |
| 38 | DUSP1       | 0.377707457 | 0.988 | 0.841 | 7.42E-06    | 0.176535164 |
| 38 | MAP2K3      | 0.425103833 | 0.337 | 0.331 | 0.000139874 | 1           |
| 38 | VMP1        | 0.493668322 | 0.347 | 0.348 | 0.000167731 | 1           |
| 38 | TLE4        | 0.419330602 | 0.29  | 0.273 | 0.000230919 | 1           |
| 38 | ACADVL      | 0.409044842 | 0.32  | 0.342 | 0.004146335 | 1           |
| 38 | EFNA1       | 0.364001799 | 0.285 | 0.282 | 0.007983029 | 1           |
| 39 | CLDN5       | 2.630217418 | 0.991 | 0.086 | 0           | 0           |
| 39 | SLC9A3R2    | 2.29259568  | 0.962 | 0.165 | 0           | 0           |
| 39 | RAMP2       | 1.955831653 | 0.984 | 0.14  | 0           | 0           |
| 39 | A2M         | 1.609904264 | 0.962 | 0.195 | 0           | 0           |
| 39 | PECAM1      | 1.449323668 | 0.927 | 0.095 | 0           | 0           |
| 39 | CLEC14A     | 1.425563384 | 0.826 | 0.08  | 0           | 0           |
| 39 | ICAM2       | 1.384880839 | 0.87  | 0.067 | 0           | 0           |
| 39 | PODXL       | 1.268184416 | 0.794 | 0.036 | 0           | 0           |
| 39 | ECSCR       | 1.224592929 | 0.848 | 0.08  | 0           | 0           |
| 39 | EGFL7       | 1.223752058 | 0.848 | 0.1   | 0           | 0           |
| 39 | ESAM        | 1.206237454 | 0.858 | 0.118 | 0           | 0           |
| 39 | SOX17       | 1.199327851 | 0.728 | 0.044 | 0           | 0           |
| 39 | RNASE1      | 1.114342912 | 0.896 | 0.104 | 0           | 0           |
| 39 | GIMAP7      | 1.107593264 | 0.772 | 0.079 | 0           | 0           |
| 39 | SEMA3G      | 1.096175769 | 0.747 | 0.016 | 0           | 0           |
| 39 | CDH5        | 1.058336175 | 0.775 | 0.064 | 0           | 0           |
| 39 | GJA4        | 1.018641607 | 0.671 | 0.071 | 0           | 0           |
| 39 | IGFBP3      | 1.693770524 | 0.756 | 0.117 | 3.39E-305   | 8.06E-301   |
| 39 | HYAL2       | 1.079494498 | 0.741 | 0.113 | 3.54E-298   | 8.42E-294   |
| 39 | EPAS1       | 1.38584343  | 0.915 | 0.203 | 4.98E-285   | 1.18E-280   |
| 39 | DEPP1       | 1.141236104 | 0.684 | 0.096 | 7.64E-283   | 1.82E-278   |
| 39 | BST2        | 1.350738056 | 0.905 | 0.209 | 1.93E-261   | 4.59E-257   |
| 39 | SRGN        | 1.080707903 | 0.953 | 0.191 | 2.58E-255   | 6.14E-251   |
| 39 | TM4SF1      | 1.78297963  | 0.991 | 0.292 | 2.29E-246   | 5.45E-242   |
| 39 | KCTD12      | 1.462421455 | 0.839 | 0.193 | 1.48E-244   | 3.53E-240   |

|    |          |             |       |       |           |           |
|----|----------|-------------|-------|-------|-----------|-----------|
| 39 | GNG11    | 1.573635353 | 0.962 | 0.265 | 1.71E-242 | 4.07E-238 |
| 39 | BCAM     | 1.179491202 | 0.915 | 0.209 | 5.53E-241 | 1.32E-236 |
| 39 | NPDC1    | 1.043174641 | 0.826 | 0.187 | 3.39E-220 | 8.06E-216 |
| 39 | IFI27    | 2.001714003 | 1     | 0.475 | 1.02E-206 | 2.44E-202 |
| 39 | KLF2     | 1.19379305  | 0.839 | 0.215 | 5.45E-206 | 1.30E-201 |
| 39 | SRP14    | 1.747867135 | 1     | 0.95  | 1.75E-202 | 4.16E-198 |
| 39 | IFI6     | 1.237448036 | 0.842 | 0.221 | 7.27E-201 | 1.73E-196 |
| 39 | PLPP1    | 1.224578459 | 0.797 | 0.201 | 1.57E-198 | 3.75E-194 |
| 39 | CRIP2    | 1.418469967 | 0.968 | 0.428 | 1.04E-194 | 2.49E-190 |
| 39 | FN1      | 1.426290706 | 0.82  | 0.221 | 1.37E-173 | 3.27E-169 |
| 39 | STOM     | 1.157282516 | 0.886 | 0.324 | 1.19E-171 | 2.84E-167 |
| 39 | ISG15    | 1.070035035 | 0.801 | 0.213 | 2.75E-171 | 6.54E-167 |
| 39 | IFITM1   | 1.126918909 | 0.858 | 0.272 | 6.14E-167 | 1.46E-162 |
| 39 | CAV1     | 1.381706788 | 0.994 | 0.657 | 5.61E-163 | 1.34E-158 |
| 39 | ADAM15   | 1.011551149 | 0.778 | 0.229 | 8.28E-162 | 1.97E-157 |
| 39 | IFITM3   | 1.243077944 | 1     | 0.761 | 6.97E-149 | 1.66E-144 |
| 39 | STMN1    | 1.12990012  | 0.851 | 0.304 | 1.42E-142 | 3.39E-138 |
| 39 | TMSB10   | 1.10105891  | 1     | 0.973 | 6.13E-141 | 1.46E-136 |
| 39 | HLA-E    | 1.029238396 | 0.997 | 0.883 | 2.01E-136 | 4.80E-132 |
| 39 | ID1      | 1.364675409 | 0.88  | 0.405 | 8.73E-136 | 2.08E-131 |
| 39 | SPARCL1  | 1.026575227 | 0.94  | 0.349 | 4.58E-133 | 1.09E-128 |
| 39 | TIMP3    | 1.019226416 | 0.877 | 0.396 | 4.44E-107 | 1.06E-102 |
| 39 | TXNIP    | 1.024922384 | 0.896 | 0.528 | 8.64E-98  | 2.06E-93  |
| 39 | ADAMTS1  | 1.009633011 | 0.696 | 0.244 | 5.96E-94  | 1.42E-89  |
| 39 | SAT1     | 1.274865615 | 0.965 | 0.792 | 3.10E-71  | 7.38E-67  |
| 40 | LYZ      | 1.165548531 | 0.581 | 0.05  | 0         | 0         |
| 40 | HLA-DPB1 | 1.56746326  | 0.898 | 0.191 | 1.95E-274 | 4.65E-270 |
| 40 | HLA-DRA  | 1.338752443 | 0.984 | 0.238 | 8.08E-257 | 1.92E-252 |
| 40 | HLA-DPA1 | 1.268813144 | 0.812 | 0.173 | 6.02E-222 | 1.43E-217 |
| 40 | HLA-DQA1 | 0.916345225 | 0.591 | 0.098 | 3.54E-192 | 8.42E-188 |
| 40 | CD74     | 1.341749734 | 1     | 0.371 | 3.41E-182 | 8.11E-178 |
| 40 | LST1     | 0.914433495 | 0.415 | 0.052 | 2.84E-181 | 6.75E-177 |
| 40 | FCER1A   | 0.648176414 | 0.313 | 0.034 | 4.60E-156 | 1.09E-151 |
| 40 | HLA-DQB1 | 0.962055929 | 0.578 | 0.136 | 5.24E-129 | 1.25E-124 |
| 40 | HLA-DRB1 | 0.905910925 | 0.703 | 0.204 | 3.70E-119 | 8.80E-115 |
| 40 | TYROBP   | 0.654495039 | 0.422 | 0.076 | 2.82E-109 | 6.71E-105 |
| 40 | AIF1     | 0.77615561  | 0.355 | 0.059 | 5.64E-107 | 1.34E-102 |
| 40 | TMSB4X   | 0.9983058   | 1     | 0.994 | 2.57E-103 | 6.12E-99  |
| 40 | CST3     | 1.090796716 | 0.997 | 0.797 | 1.62E-94  | 3.87E-90  |
| 40 | FCER1G   | 0.592859044 | 0.326 | 0.069 | 4.06E-70  | 9.65E-66  |
| 40 | TMSB10   | 0.736686975 | 1     | 0.973 | 6.76E-69  | 1.61E-64  |
| 40 | ACTB     | 0.731514155 | 1     | 0.995 | 4.79E-52  | 1.14E-47  |
| 40 | RPL28    | 0.463647545 | 1     | 0.999 | 3.42E-48  | 8.14E-44  |
| 40 | FTH1     | 0.521719789 | 1     | 0.951 | 4.35E-43  | 1.04E-38  |
| 40 | FTL      | 0.571576889 | 1     | 0.97  | 4.43E-38  | 1.05E-33  |
| 40 | PFN1     | 0.517411592 | 1     | 0.966 | 1.22E-34  | 2.91E-30  |
| 40 | SAT1     | 0.490623522 | 1     | 0.792 | 1.56E-32  | 3.72E-28  |
| 40 | S100A4   | 0.355355643 | 0.994 | 0.676 | 8.91E-30  | 2.12E-25  |
| 40 | NAMPT    | 0.301592155 | 0.869 | 0.465 | 9.72E-29  | 2.31E-24  |
| 40 | RPS23    | 0.330957762 | 1     | 0.999 | 6.94E-28  | 1.65E-23  |
| 40 | EMP3     | 0.279098885 | 0.78  | 0.413 | 9.90E-27  | 2.36E-22  |
| 40 | RPL27A   | 0.33020365  | 1     | 1     | 1.44E-25  | 3.42E-21  |
| 40 | TPM3     | 0.315038582 | 0.802 | 0.449 | 3.97E-25  | 9.45E-21  |
| 40 | RPS29    | 0.331619323 | 1     | 0.999 | 9.27E-25  | 2.21E-20  |
| 40 | ATP5F1E  | 0.468165735 | 1     | 0.958 | 1.76E-24  | 4.20E-20  |
| 40 | AP2S1    | 0.314386203 | 0.869 | 0.504 | 1.08E-23  | 2.57E-19  |
| 40 | HIGD2A   | 0.271971046 | 0.888 | 0.528 | 7.32E-21  | 1.74E-16  |
| 40 | RPS11    | 0.368279535 | 1     | 0.999 | 1.36E-20  | 3.24E-16  |
| 40 | RPS20    | 0.341146563 | 1     | 0.999 | 2.55E-20  | 6.08E-16  |
| 40 | RPS24    | 0.268283318 | 1     | 0.998 | 4.53E-20  | 1.08E-15  |
| 40 | ARPC3    | 0.416637737 | 0.971 | 0.688 | 8.79E-20  | 2.09E-15  |
| 40 | HLA-DMA  | 0.426590773 | 0.284 | 0.126 | 9.44E-20  | 2.25E-15  |
| 40 | ARPC5    | 0.260980562 | 0.805 | 0.477 | 2.50E-19  | 5.95E-15  |
| 40 | RPS13    | 0.30914329  | 1     | 0.999 | 4.13E-19  | 9.82E-15  |

|    |          |             |       |       |           |            |
|----|----------|-------------|-------|-------|-----------|------------|
| 40 | S100A10  | 0.322675847 | 1     | 0.897 | 2.36E-18  | 5.62E-14   |
| 40 | GNG5     | 0.2773642   | 0.939 | 0.591 | 4.37E-18  | 1.04E-13   |
| 40 | RPL19    | 0.268978352 | 1     | 1     | 4.58E-17  | 1.09E-12   |
| 40 | RPL21    | 0.280439609 | 1     | 1     | 8.39E-14  | 2.00E-09   |
| 40 | SH3BGRL3 | 0.389669653 | 0.997 | 0.789 | 9.95E-14  | 2.37E-09   |
| 40 | TUBA1B   | 0.454347333 | 0.994 | 0.934 | 4.89E-13  | 1.16E-08   |
| 40 | COTL1    | 0.507549575 | 0.31  | 0.186 | 7.07E-13  | 1.68E-08   |
| 40 | ARPC2    | 0.323601965 | 0.994 | 0.878 | 9.58E-13  | 2.28E-08   |
| 40 | UBA52    | 0.275134977 | 1     | 0.998 | 4.34E-11  | 1.03E-06   |
| 40 | OAZ1     | 0.319397332 | 1     | 0.983 | 3.57E-09  | 8.49E-05   |
| 40 | YBX1     | 0.289433119 | 1     | 0.982 | 4.11E-06  | 0.09785014 |
| 41 | ANGPTL7  | 1.917961601 | 0.408 | 0.004 | 0         | 0          |
| 41 | FGFBP2   | 1.115660692 | 0.525 | 0.025 | 0         | 0          |
| 41 | ENTPD2   | 0.577128204 | 0.317 | 0.015 | 0         | 0          |
| 41 | ABCA8    | 0.911104946 | 0.673 | 0.094 | 5.92E-253 | 1.41E-248  |
| 41 | APOD     | 3.722124619 | 1     | 0.368 | 4.21E-239 | 1.00E-234  |
| 41 | PODNL1   | 0.60164266  | 0.419 | 0.039 | 5.04E-238 | 1.20E-233  |
| 41 | GPC3     | 1.018382908 | 0.665 | 0.095 | 8.51E-237 | 2.03E-232  |
| 41 | CYP1B1   | 1.189987992 | 0.616 | 0.106 | 1.04E-185 | 2.47E-181  |
| 41 | VIT      | 0.582299364 | 0.437 | 0.055 | 7.24E-179 | 1.72E-174  |
| 41 | LTBP4    | 1.195298821 | 0.81  | 0.216 | 7.56E-179 | 1.80E-174  |
| 41 | CFH      | 1.132676845 | 0.852 | 0.22  | 4.77E-159 | 1.13E-154  |
| 41 | C2orf40  | 0.94209414  | 0.433 | 0.061 | 3.16E-156 | 7.53E-152  |
| 41 | LUM      | 1.33169353  | 0.933 | 0.308 | 9.76E-155 | 2.32E-150  |
| 41 | PTGDS    | 1.747022439 | 0.838 | 0.267 | 5.93E-141 | 1.41E-136  |
| 41 | IGFBP6   | 1.187525659 | 0.683 | 0.161 | 7.30E-139 | 1.74E-134  |
| 41 | GSN      | 1.351350402 | 1     | 0.742 | 4.68E-125 | 1.11E-120  |
| 41 | PDGFRL   | 0.61135019  | 0.553 | 0.122 | 4.82E-109 | 1.15E-104  |
| 41 | DCN      | 0.992297013 | 1     | 0.562 | 5.90E-109 | 1.40E-104  |
| 41 | RARRES2  | 0.679885571 | 0.718 | 0.197 | 6.91E-108 | 1.64E-103  |
| 41 | MEG3     | 0.908662777 | 0.651 | 0.187 | 4.49E-94  | 1.07E-89   |
| 41 | AKAP12   | 0.574974432 | 0.5   | 0.12  | 1.99E-91  | 4.73E-87   |
| 41 | IGFBP7   | 1.017415663 | 0.996 | 0.648 | 1.08E-87  | 2.57E-83   |
| 41 | NGFR     | 0.645441191 | 0.331 | 0.061 | 1.34E-84  | 3.19E-80   |
| 41 | CST3     | 0.723056448 | 1     | 0.797 | 1.02E-75  | 2.42E-71   |
| 41 | C1S      | 0.585409052 | 0.87  | 0.352 | 2.28E-75  | 5.44E-71   |
| 41 | SERPING1 | 0.694466116 | 0.88  | 0.427 | 2.20E-73  | 5.23E-69   |
| 41 | PLAC9    | 0.751702092 | 0.817 | 0.365 | 6.25E-73  | 1.49E-68   |
| 41 | SERPINF1 | 0.840478852 | 0.835 | 0.388 | 1.82E-70  | 4.34E-66   |
| 41 | TIMP1    | 0.726265881 | 0.944 | 0.588 | 3.60E-67  | 8.57E-63   |
| 41 | TCF4     | 0.667387134 | 0.75  | 0.335 | 8.07E-66  | 1.92E-61   |
| 41 | LAPTM4A  | 0.689686867 | 0.996 | 0.9   | 1.64E-64  | 3.91E-60   |
| 41 | LGALS1   | 0.638507314 | 1     | 0.673 | 2.09E-63  | 4.98E-59   |
| 41 | S100A6   | 0.624184882 | 1     | 0.827 | 1.70E-59  | 4.06E-55   |
| 41 | DKK3     | 0.540418177 | 0.535 | 0.186 | 5.68E-59  | 1.35E-54   |
| 41 | CNN3     | 0.622056326 | 0.725 | 0.331 | 5.78E-59  | 1.37E-54   |
| 41 | EID1     | 0.564777233 | 0.954 | 0.677 | 3.57E-58  | 8.50E-54   |
| 41 | CD63     | 0.56531074  | 0.996 | 0.849 | 7.86E-56  | 1.87E-51   |
| 41 | SPARCL1  | 0.58577384  | 0.782 | 0.35  | 1.70E-55  | 4.05E-51   |
| 41 | ZBTB20   | 0.594133081 | 0.658 | 0.303 | 1.97E-54  | 4.68E-50   |
| 41 | LHFPL6   | 0.658908401 | 0.63  | 0.266 | 2.27E-52  | 5.40E-48   |
| 41 | FN1      | 0.797374777 | 0.57  | 0.223 | 1.34E-50  | 3.19E-46   |
| 41 | SPTBN1   | 0.544386368 | 0.602 | 0.278 | 5.49E-46  | 1.31E-41   |
| 41 | CEBPD    | 0.90681611  | 0.958 | 0.821 | 1.37E-34  | 3.26E-30   |
| 41 | CCL2     | 0.738869813 | 0.739 | 0.506 | 2.76E-25  | 6.57E-21   |
| 41 | HES1     | 0.636188541 | 0.796 | 0.6   | 9.69E-23  | 2.31E-18   |
| 41 | CYR61    | 0.567053193 | 0.722 | 0.526 | 1.32E-22  | 3.14E-18   |
| 41 | TXNIP    | 0.550874845 | 0.68  | 0.529 | 7.19E-22  | 1.71E-17   |
| 41 | JUN      | 0.727094856 | 0.954 | 0.861 | 1.93E-21  | 4.60E-17   |
| 41 | ID3      | 0.702068905 | 0.81  | 0.666 | 1.81E-20  | 4.30E-16   |
| 41 | EGR1     | 0.614423456 | 0.715 | 0.605 | 3.11E-17  | 7.39E-13   |
| 42 | IGHM     | 1.699141327 | 0.76  | 0.004 | 0         | 0          |
| 42 | CD37     | 1.594294943 | 0.909 | 0.07  | 0         | 0          |
| 42 | CD79A    | 1.348593148 | 0.635 | 0.008 | 0         | 0          |

|    |          |             |       |       |           |           |
|----|----------|-------------|-------|-------|-----------|-----------|
| 42 | MS4A1    | 1.227547232 | 0.558 | 0.001 | 0         | 0         |
| 42 | LTB      | 1.209008924 | 0.731 | 0.043 | 0         | 0         |
| 42 | CCR7     | 1.152600193 | 0.519 | 0.028 | 0         | 0         |
| 42 | LY9      | 0.986334089 | 0.457 | 0.01  | 0         | 0         |
| 42 | IGKC     | 0.882239349 | 0.75  | 0.052 | 0         | 0         |
| 42 | SPIB     | 0.798779183 | 0.476 | 0.008 | 0         | 0         |
| 42 | JCHAIN   | 0.746904806 | 0.308 | 0.01  | 0         | 0         |
| 42 | RUBCNL   | 0.659340863 | 0.423 | 0.017 | 0         | 0         |
| 42 | LAPTM5   | 1.354754596 | 0.827 | 0.107 | 8.86E-260 | 2.11E-255 |
| 42 | CD69     | 1.367685664 | 0.524 | 0.045 | 4.79E-241 | 1.14E-236 |
| 42 | CD52     | 1.012808261 | 0.663 | 0.07  | 3.84E-235 | 9.15E-231 |
| 42 | RHOH     | 0.713761913 | 0.471 | 0.037 | 1.72E-232 | 4.09E-228 |
| 42 | CXCR4    | 1.687804215 | 0.755 | 0.1   | 1.38E-230 | 3.28E-226 |
| 42 | HLA-DQA1 | 0.998022068 | 0.774 | 0.098 | 3.63E-228 | 8.63E-224 |
| 42 | HLA-DQB1 | 1.105404027 | 0.88  | 0.136 | 9.79E-225 | 2.33E-220 |
| 42 | CORO1A   | 0.778892952 | 0.639 | 0.07  | 2.75E-219 | 6.54E-215 |
| 42 | IRF8     | 1.007365627 | 0.519 | 0.049 | 3.79E-218 | 9.02E-214 |
| 42 | CD83     | 1.335279687 | 0.784 | 0.123 | 8.97E-205 | 2.13E-200 |
| 42 | HLA-DPB1 | 1.012057459 | 0.942 | 0.192 | 1.48E-184 | 3.52E-180 |
| 42 | CD48     | 0.741005822 | 0.476 | 0.05  | 1.29E-173 | 3.08E-169 |
| 42 | HLA-DRA  | 1.371111135 | 0.981 | 0.24  | 1.29E-173 | 3.08E-169 |
| 42 | HLA-DPA1 | 0.894848202 | 0.904 | 0.174 | 6.20E-172 | 1.48E-167 |
| 42 | CYTIP    | 0.724834944 | 0.519 | 0.061 | 6.04E-162 | 1.44E-157 |
| 42 | LIMD2    | 0.649408663 | 0.476 | 0.058 | 6.22E-150 | 1.48E-145 |
| 42 | GPR183   | 1.493655834 | 0.591 | 0.088 | 2.95E-143 | 7.01E-139 |
| 42 | HLA-DRB1 | 1.048637383 | 0.885 | 0.204 | 4.94E-139 | 1.18E-134 |
| 42 | CD74     | 1.589901878 | 1     | 0.372 | 6.35E-136 | 1.51E-131 |
| 42 | STK4     | 0.84015579  | 0.644 | 0.131 | 3.29E-119 | 7.84E-115 |
| 42 | RPS27    | 0.891519052 | 1     | 1     | 2.71E-102 | 6.45E-98  |
| 42 | PHACTR1  | 0.6836596   | 0.423 | 0.065 | 4.14E-101 | 9.86E-97  |
| 42 | NFKBID   | 0.857227756 | 0.562 | 0.121 | 7.98E-97  | 1.90E-92  |
| 42 | RPS29    | 0.802042497 | 1     | 0.999 | 5.43E-89  | 1.29E-84  |
| 42 | RPL21    | 0.712276234 | 1     | 1     | 1.48E-88  | 3.51E-84  |
| 42 | RPLP2    | 0.714895566 | 1     | 1     | 2.13E-88  | 5.07E-84  |
| 42 | CREM     | 1.122629502 | 0.688 | 0.214 | 1.09E-76  | 2.59E-72  |
| 42 | RPL23A   | 0.63209855  | 1     | 1     | 1.84E-74  | 4.38E-70  |
| 42 | REL      | 1.042134273 | 0.856 | 0.436 | 8.55E-69  | 2.04E-64  |
| 42 | RPL39    | 0.643032453 | 1     | 0.999 | 2.18E-68  | 5.18E-64  |
| 42 | CYBA     | 0.922173306 | 0.774 | 0.339 | 5.82E-60  | 1.39E-55  |
| 42 | EZR      | 0.952167091 | 0.909 | 0.537 | 3.26E-58  | 7.77E-54  |
| 42 | BIRC3    | 0.762097307 | 0.524 | 0.173 | 4.55E-47  | 1.08E-42  |
| 42 | HERPUD1  | 1.25535563  | 0.875 | 0.676 | 1.13E-45  | 2.69E-41  |
| 42 | SRGN     | 0.713030693 | 0.562 | 0.194 | 9.90E-41  | 2.36E-36  |
| 42 | HSPE1    | 0.767171149 | 0.918 | 0.793 | 2.44E-29  | 5.81E-25  |
| 42 | NR4A2    | 0.694867368 | 0.534 | 0.267 | 4.10E-24  | 9.76E-20  |
| 42 | IRF7     | 0.932144458 | 0.293 | 0.123 | 3.48E-18  | 8.28E-14  |
| 42 | RGS2     | 1.160257626 | 0.332 | 0.197 | 1.73E-09  | 4.12E-05  |
| 43 | CCL19    | 3.295404518 | 1     | 0.054 | 0         | 0         |
| 43 | CCL21    | 2.172874125 | 0.826 | 0.027 | 0         | 0         |
| 43 | STEAP4   | 1.063857652 | 0.669 | 0.087 | 3.63E-170 | 8.63E-166 |
| 43 | LGI4     | 0.745365022 | 0.593 | 0.071 | 6.51E-158 | 1.55E-153 |
| 43 | GGT5     | 1.014590347 | 0.773 | 0.132 | 7.96E-148 | 1.89E-143 |
| 43 | RERG     | 0.757752666 | 0.622 | 0.085 | 2.13E-146 | 5.07E-142 |
| 43 | SYNPO2   | 0.917036464 | 0.703 | 0.12  | 4.16E-131 | 9.91E-127 |
| 43 | NR2F2    | 1.101259692 | 0.773 | 0.161 | 9.69E-124 | 2.31E-119 |
| 43 | GPX3     | 1.077021213 | 0.82  | 0.189 | 1.51E-112 | 3.59E-108 |
| 43 | TINAGL1  | 1.022110179 | 0.756 | 0.158 | 9.00E-110 | 2.14E-105 |
| 43 | ACTA2    | 1.349502306 | 0.814 | 0.188 | 4.05E-106 | 9.63E-102 |
| 43 | ANGPT2   | 0.681699547 | 0.622 | 0.106 | 8.57E-105 | 2.04E-100 |
| 43 | EPS8     | 0.788314149 | 0.738 | 0.165 | 1.46E-104 | 3.49E-100 |
| 43 | FGF7     | 0.927165108 | 0.698 | 0.145 | 1.67E-104 | 3.98E-100 |
| 43 | TAGLN    | 1.544495814 | 0.924 | 0.298 | 3.05E-102 | 7.27E-98  |
| 43 | FILIP1L  | 0.890587656 | 0.68  | 0.159 | 5.73E-91  | 1.36E-86  |
| 43 | ISYNA1   | 0.780725358 | 0.558 | 0.104 | 1.77E-90  | 4.22E-86  |

|    |            |             |       |       |           |           |
|----|------------|-------------|-------|-------|-----------|-----------|
| 43 | RARRES2    | 0.873501917 | 0.779 | 0.198 | 4.47E-88  | 1.06E-83  |
| 43 | CPE        | 0.970001477 | 0.86  | 0.257 | 6.46E-86  | 1.54E-81  |
| 43 | LHFPL6     | 0.886719458 | 0.837 | 0.267 | 7.18E-83  | 1.71E-78  |
| 43 | IGFBP5     | 1.596468375 | 0.785 | 0.24  | 2.37E-81  | 5.64E-77  |
| 43 | DEPP1      | 0.823529882 | 0.512 | 0.098 | 1.81E-76  | 4.31E-72  |
| 43 | CALD1      | 1.320147685 | 0.965 | 0.582 | 2.73E-75  | 6.49E-71  |
| 43 | C2orf40    | 1.094682095 | 0.39  | 0.062 | 5.08E-74  | 1.21E-69  |
| 43 | PRRX1      | 0.840273724 | 0.75  | 0.222 | 8.55E-74  | 2.04E-69  |
| 43 | MYL9       | 1.035846261 | 0.948 | 0.461 | 2.35E-73  | 5.60E-69  |
| 43 | IGFBP7     | 1.37405633  | 0.994 | 0.648 | 9.70E-73  | 2.31E-68  |
| 43 | TIMP3      | 1.244190994 | 0.878 | 0.398 | 3.32E-72  | 7.90E-68  |
| 43 | RGS5       | 0.852002686 | 0.5   | 0.093 | 6.93E-72  | 1.65E-67  |
| 43 | TFPI       | 0.735915244 | 0.669 | 0.172 | 8.47E-72  | 2.02E-67  |
| 43 | IFITM3     | 1.060908002 | 1     | 0.762 | 4.02E-70  | 9.57E-66  |
| 43 | ID4        | 0.996048038 | 0.762 | 0.255 | 7.11E-69  | 1.69E-64  |
| 43 | FHL2       | 0.744500275 | 0.64  | 0.18  | 2.87E-66  | 6.84E-62  |
| 43 | CTSC       | 0.895164251 | 0.721 | 0.237 | 3.68E-66  | 8.75E-62  |
| 43 | IFITM1     | 0.820206828 | 0.797 | 0.274 | 7.39E-66  | 1.76E-61  |
| 43 | RGS16      | 1.545432195 | 0.797 | 0.316 | 1.23E-60  | 2.92E-56  |
| 43 | C11orf96   | 0.716383798 | 0.68  | 0.196 | 4.19E-58  | 9.97E-54  |
| 43 | SELENOM    | 0.734511573 | 0.942 | 0.488 | 1.09E-51  | 2.59E-47  |
| 43 | CCL8       | 0.733911887 | 0.291 | 0.047 | 5.40E-51  | 1.29E-46  |
| 43 | ADIRF      | 0.760996151 | 0.983 | 0.634 | 1.09E-50  | 2.59E-46  |
| 43 | TGFBI      | 1.054472696 | 0.721 | 0.283 | 4.13E-50  | 9.83E-46  |
| 43 | SERPING1   | 0.792192871 | 0.872 | 0.428 | 1.71E-49  | 4.07E-45  |
| 43 | C1S        | 0.670600925 | 0.866 | 0.353 | 2.33E-48  | 5.55E-44  |
| 43 | IFITM2     | 0.77474756  | 0.919 | 0.561 | 4.32E-46  | 1.03E-41  |
| 43 | S100A4     | 0.825083728 | 0.988 | 0.677 | 9.52E-45  | 2.27E-40  |
| 43 | CCL2       | 1.095219335 | 0.89  | 0.506 | 2.25E-43  | 5.35E-39  |
| 43 | TPM1       | 0.737803269 | 0.744 | 0.356 | 6.38E-40  | 1.52E-35  |
| 43 | 7-Sep      | 0.721821715 | 0.866 | 0.631 | 3.78E-39  | 9.00E-35  |
| 43 | NDUFA4L2   | 0.895656854 | 0.593 | 0.242 | 6.73E-34  | 1.60E-29  |
| 43 | CYR61      | 0.745764061 | 0.744 | 0.526 | 1.50E-19  | 3.58E-15  |
| 44 | IGKC       | 7.284640366 | 0.756 | 0.053 | 0         | 0         |
| 44 | IGLC3      | 7.077897969 | 0.774 | 0.025 | 0         | 0         |
| 44 | IGLC2      | 6.67108764  | 0.72  | 0.019 | 0         | 0         |
| 44 | IGHG1      | 6.559663056 | 0.915 | 0.013 | 0         | 0         |
| 44 | IGHG3      | 6.440959484 | 0.933 | 0.019 | 0         | 0         |
| 44 | JCHAIN     | 5.149108722 | 0.841 | 0.009 | 0         | 0         |
| 44 | IGHA1      | 4.962746319 | 0.311 | 0.009 | 0         | 0         |
| 44 | IGHG4      | 4.480336182 | 0.86  | 0.007 | 0         | 0         |
| 44 | IGHG2      | 4.087463095 | 0.787 | 0.001 | 0         | 0         |
| 44 | IGHM       | 3.887047528 | 0.476 | 0.006 | 0         | 0         |
| 44 | MZB1       | 2.428646243 | 0.982 | 0.003 | 0         | 0         |
| 44 | CD79A      | 2.373515533 | 0.896 | 0.008 | 0         | 0         |
| 44 | DERL3      | 1.933076481 | 0.963 | 0.004 | 0         | 0         |
| 44 | IGHGP      | 1.438219899 | 0.543 | 0     | 0         | 0         |
| 44 | CD27       | 1.264651233 | 0.841 | 0.01  | 0         | 0         |
| 44 | LY9        | 0.894689039 | 0.591 | 0.01  | 0         | 0         |
| 44 | SPAG4      | 0.860294839 | 0.707 | 0.003 | 0         | 0         |
| 44 | IGLV6-57   | 0.810662758 | 0.463 | 0     | 0         | 0         |
| 44 | EVI2B      | 0.693496626 | 0.665 | 0.043 | 0         | 0         |
| 44 | CYTIP      | 0.939156948 | 0.756 | 0.061 | 2.12E-293 | 5.06E-289 |
| 44 | ANKRD28    | 1.099514533 | 0.805 | 0.108 | 9.38E-199 | 2.23E-194 |
| 44 | FKBP11     | 1.476041105 | 0.902 | 0.158 | 6.18E-198 | 1.47E-193 |
| 44 | SEC11C     | 1.316942721 | 0.89  | 0.153 | 1.15E-194 | 2.73E-190 |
| 44 | PDE4B      | 0.751843054 | 0.671 | 0.072 | 2.50E-194 | 5.95E-190 |
| 44 | PIM2       | 1.058167863 | 0.726 | 0.097 | 6.65E-181 | 1.58E-176 |
| 44 | CYBA       | 2.277767658 | 1     | 0.339 | 4.01E-147 | 9.56E-143 |
| 44 | ISG20      | 0.795567193 | 0.689 | 0.098 | 1.06E-146 | 2.52E-142 |
| 44 | SERPINB9   | 0.760623314 | 0.628 | 0.086 | 1.40E-135 | 3.33E-131 |
| 44 | AL121944.1 | 0.873818565 | 0.598 | 0.085 | 1.49E-131 | 3.55E-127 |
| 44 | SDF2L1     | 0.909662924 | 0.805 | 0.194 | 7.93E-109 | 1.89E-104 |
| 44 | SSR4       | 1.964042413 | 0.988 | 0.737 | 1.35E-108 | 3.21E-104 |

|    |            |             |       |       |           |           |
|----|------------|-------------|-------|-------|-----------|-----------|
| 44 | CXCR4      | 0.958703646 | 0.634 | 0.101 | 5.74E-108 | 1.37E-103 |
| 44 | HERPUD1    | 2.306042038 | 0.976 | 0.676 | 2.03E-99  | 4.83E-95  |
| 44 | TNFRSF18   | 0.679075642 | 0.72  | 0.155 | 3.49E-95  | 8.30E-91  |
| 44 | ITM2C      | 0.868938872 | 0.695 | 0.152 | 5.04E-92  | 1.20E-87  |
| 44 | DNAJB9     | 1.011743693 | 0.841 | 0.273 | 4.96E-89  | 1.18E-84  |
| 44 | DUSP5      | 1.430905148 | 0.732 | 0.2   | 1.34E-86  | 3.19E-82  |
| 44 | PRDX4      | 0.862241227 | 0.878 | 0.292 | 9.12E-86  | 2.17E-81  |
| 44 | XBP1       | 1.268521656 | 0.97  | 0.504 | 8.10E-85  | 1.93E-80  |
| 44 | ERLEC1     | 0.688920801 | 0.689 | 0.178 | 2.98E-78  | 7.10E-74  |
| 44 | CYTOR      | 0.867092306 | 0.72  | 0.197 | 4.38E-72  | 1.04E-67  |
| 44 | RGS1       | 0.91110704  | 0.372 | 0.056 | 1.24E-68  | 2.95E-64  |
| 44 | SPCS2      | 0.747965999 | 0.902 | 0.54  | 1.30E-57  | 3.09E-53  |
| 44 | PELI1      | 0.784713127 | 0.646 | 0.2   | 1.14E-56  | 2.71E-52  |
| 44 | RGCC       | 0.902628716 | 0.72  | 0.238 | 2.74E-51  | 6.51E-47  |
| 44 | BIRC3      | 0.774443152 | 0.561 | 0.173 | 2.14E-42  | 5.10E-38  |
| 44 | ERN1       | 0.938340243 | 0.378 | 0.089 | 8.85E-42  | 2.11E-37  |
| 44 | TSC22D3    | 1.017337507 | 0.768 | 0.437 | 2.19E-36  | 5.21E-32  |
| 44 | SAT1       | 1.20442031  | 0.909 | 0.793 | 5.84E-26  | 1.39E-21  |
| 44 | DDIT4      | 0.885893036 | 0.707 | 0.409 | 2.27E-25  | 5.40E-21  |
| 45 | HSPA6      | 2.643212532 | 1     | 0.135 | 3.22E-178 | 7.66E-174 |
| 45 | KRT15      | 1.61781985  | 0.95  | 0.187 | 8.08E-97  | 1.92E-92  |
| 45 | COL17A1    | 1.032243087 | 0.861 | 0.154 | 1.07E-87  | 2.55E-83  |
| 45 | SYT8       | 0.728791038 | 0.604 | 0.098 | 1.94E-66  | 4.62E-62  |
| 45 | S100A2     | 1.060597868 | 1     | 0.388 | 1.91E-53  | 4.55E-49  |
| 45 | HSPA1A     | 1.482191853 | 1     | 0.932 | 2.12E-53  | 5.05E-49  |
| 45 | ATF3       | 1.553422991 | 1     | 0.559 | 3.38E-53  | 8.04E-49  |
| 45 | HSPA1B     | 1.447599329 | 1     | 0.871 | 5.78E-52  | 1.38E-47  |
| 45 | KRT5       | 1.35479513  | 1     | 0.497 | 9.85E-50  | 2.34E-45  |
| 45 | KRT14      | 1.632202323 | 1     | 0.675 | 4.00E-49  | 9.53E-45  |
| 45 | JUN        | 1.40587256  | 1     | 0.861 | 1.62E-47  | 3.87E-43  |
| 45 | DST        | 1.020424401 | 0.911 | 0.335 | 3.23E-46  | 7.70E-42  |
| 45 | DNAJB1     | 1.295068714 | 1     | 0.846 | 6.04E-46  | 1.44E-41  |
| 45 | HSPB1      | 1.196986473 | 1     | 0.971 | 1.56E-44  | 3.70E-40  |
| 45 | HSP90AA1   | 1.123930174 | 1     | 0.971 | 5.02E-42  | 1.20E-37  |
| 45 | SOX15      | 0.7505537   | 0.851 | 0.278 | 1.05E-41  | 2.50E-37  |
| 45 | UBC        | 0.972208369 | 1     | 0.992 | 1.30E-41  | 3.11E-37  |
| 45 | DNAJB4     | 0.832045963 | 0.762 | 0.246 | 2.41E-40  | 5.74E-36  |
| 45 | ZFAND2A    | 0.972081221 | 0.713 | 0.227 | 1.03E-38  | 2.45E-34  |
| 45 | FOS        | 1.395012665 | 0.97  | 0.788 | 2.47E-38  | 5.88E-34  |
| 45 | HSPH1      | 1.142101975 | 0.921 | 0.542 | 2.71E-37  | 6.45E-33  |
| 45 | AC020916.1 | 0.717274029 | 0.752 | 0.251 | 8.24E-37  | 1.96E-32  |
| 45 | DNAJA1     | 1.077022414 | 1     | 0.83  | 4.98E-35  | 1.19E-30  |
| 45 | EGR1       | 1.202314294 | 0.911 | 0.605 | 1.21E-34  | 2.87E-30  |
| 45 | TOB1       | 0.898265555 | 0.861 | 0.443 | 1.66E-33  | 3.94E-29  |
| 45 | SERPINH1   | 1.259920241 | 0.891 | 0.476 | 1.93E-33  | 4.60E-29  |
| 45 | ANKRD37    | 0.858163527 | 0.594 | 0.175 | 9.00E-33  | 2.14E-28  |
| 45 | IFRD1      | 0.80767752  | 0.842 | 0.366 | 7.19E-32  | 1.71E-27  |
| 45 | FOSB       | 1.015265117 | 0.941 | 0.659 | 1.71E-31  | 4.08E-27  |
| 45 | HSPA8      | 0.926230381 | 1     | 0.932 | 2.34E-30  | 5.57E-26  |
| 45 | PMAIP1     | 0.716274505 | 0.772 | 0.294 | 1.30E-29  | 3.09E-25  |
| 45 | ZFP36      | 0.916415781 | 1     | 0.898 | 6.94E-29  | 1.65E-24  |
| 45 | ARL4A      | 0.801237864 | 0.733 | 0.297 | 5.77E-27  | 1.37E-22  |
| 45 | RND3       | 0.818050209 | 0.792 | 0.388 | 1.09E-26  | 2.59E-22  |
| 45 | TRA2B      | 0.709565053 | 0.861 | 0.526 | 4.88E-26  | 1.16E-21  |
| 45 | DUSP1      | 1.287165511 | 0.931 | 0.842 | 4.09E-25  | 9.75E-21  |
| 45 | IER2       | 0.776329399 | 0.98  | 0.81  | 4.68E-25  | 1.11E-20  |
| 45 | SERTAD1    | 0.713921611 | 0.891 | 0.529 | 8.35E-25  | 1.99E-20  |
| 45 | BAG3       | 0.821662963 | 0.832 | 0.47  | 2.81E-24  | 6.69E-20  |
| 45 | CYR61      | 1.322130676 | 0.832 | 0.526 | 2.68E-23  | 6.38E-19  |
| 45 | NR4A1      | 0.881685195 | 0.832 | 0.494 | 3.42E-23  | 8.14E-19  |
| 45 | MYC        | 1.027966036 | 0.931 | 0.704 | 2.82E-22  | 6.71E-18  |
| 45 | SLC38A2    | 0.753974207 | 0.901 | 0.689 | 1.77E-21  | 4.21E-17  |
| 45 | HES1       | 1.065892592 | 0.861 | 0.6   | 7.99E-21  | 1.90E-16  |
| 45 | INTS6      | 0.705595418 | 0.802 | 0.483 | 7.77E-19  | 1.85E-14  |

|    |           |             |       |       |           |            |
|----|-----------|-------------|-------|-------|-----------|------------|
| 45 | BTG2      | 0.813114775 | 0.832 | 0.565 | 1.02E-18  | 2.43E-14   |
| 45 | SGK1      | 0.718607101 | 0.683 | 0.361 | 1.65E-14  | 3.93E-10   |
| 45 | ANXA1     | 0.762671019 | 0.97  | 0.869 | 5.50E-13  | 1.31E-08   |
| 45 | UBB       | 0.774253393 | 0.911 | 0.97  | 1.61E-11  | 3.82E-07   |
| 45 | CRYAB     | 0.750858904 | 0.653 | 0.448 | 1.51E-08  | 0.00035879 |
| 46 | MPZ       | 4.226660735 | 1     | 0.009 | 0         | 0          |
| 46 | S100B     | 2.39034972  | 0.941 | 0.024 | 0         | 0          |
| 46 | PMP2      | 1.748414652 | 0.662 | 0.005 | 0         | 0          |
| 46 | MIA       | 1.370275558 | 0.691 | 0.018 | 0         | 0          |
| 46 | MLIP      | 1.369169082 | 0.706 | 0.006 | 0         | 0          |
| 46 | BCAS1     | 1.292370784 | 0.676 | 0.004 | 0         | 0          |
| 46 | MT3       | 1.290437831 | 0.632 | 0.002 | 0         | 0          |
| 46 | KIF19     | 1.032377853 | 0.544 | 0.005 | 0         | 0          |
| 46 | NCMAP     | 0.978241902 | 0.588 | 0.001 | 0         | 0          |
| 46 | AATK      | 0.925451542 | 0.559 | 0.005 | 0         | 0          |
| 46 | PLEKHB1   | 0.88330954  | 0.471 | 0.009 | 0         | 0          |
| 46 | CLDN19    | 0.829209593 | 0.485 | 0.001 | 0         | 0          |
| 46 | SOX2      | 1.204197762 | 0.471 | 0.01  | 5.20E-298 | 1.24E-293  |
| 46 | PRX       | 2.156219003 | 0.897 | 0.046 | 8.86E-263 | 2.11E-258  |
| 46 | MAL       | 0.920729132 | 0.515 | 0.015 | 1.23E-238 | 2.93E-234  |
| 46 | FGFBP2    | 1.240301667 | 0.676 | 0.027 | 2.30E-236 | 5.48E-232  |
| 46 | PLP1      | 2.173794942 | 0.853 | 0.062 | 3.17E-178 | 7.55E-174  |
| 46 | MBP       | 3.155745765 | 0.956 | 0.118 | 6.96E-129 | 1.66E-124  |
| 46 | GPM6B     | 1.640670513 | 0.912 | 0.103 | 2.56E-123 | 6.10E-119  |
| 46 | SEMA3B    | 1.091043436 | 0.632 | 0.047 | 1.83E-120 | 4.36E-116  |
| 46 | LPL       | 0.865942907 | 0.5   | 0.035 | 1.89E-98  | 4.50E-94   |
| 46 | GLDN      | 1.185749909 | 0.603 | 0.058 | 6.21E-90  | 1.48E-85   |
| 46 | PLLP      | 1.345460519 | 0.75  | 0.101 | 3.31E-85  | 7.88E-81   |
| 46 | FXYD6     | 1.216061688 | 0.647 | 0.071 | 8.61E-85  | 2.05E-80   |
| 46 | SECISBP2L | 1.229609789 | 0.676 | 0.083 | 1.08E-81  | 2.57E-77   |
| 46 | PLEKHA4   | 1.507437196 | 0.706 | 0.122 | 3.86E-62  | 9.18E-58   |
| 46 | PMP22     | 3.042025242 | 1     | 0.379 | 1.58E-59  | 3.77E-55   |
| 46 | GATM      | 1.498594734 | 0.779 | 0.16  | 6.07E-59  | 1.44E-54   |
| 46 | SVIP      | 1.170107284 | 0.721 | 0.136 | 5.98E-57  | 1.42E-52   |
| 46 | CNP       | 1.252507145 | 0.735 | 0.16  | 4.41E-52  | 1.05E-47   |
| 46 | CRYAB     | 2.215443686 | 1     | 0.447 | 1.22E-49  | 2.91E-45   |
| 46 | ITM2C     | 1.142733442 | 0.691 | 0.153 | 5.23E-45  | 1.24E-40   |
| 46 | PLA2G16   | 1.057896037 | 0.603 | 0.121 | 2.58E-42  | 6.14E-38   |
| 46 | LIMCH1    | 0.994794896 | 0.559 | 0.103 | 5.11E-42  | 1.22E-37   |
| 46 | TSC22D4   | 1.346582838 | 0.706 | 0.193 | 3.41E-40  | 8.11E-36   |
| 46 | RHOBTB3   | 0.878437166 | 0.559 | 0.137 | 2.83E-30  | 6.74E-26   |
| 46 | PEBP1     | 0.973403283 | 1     | 0.823 | 3.91E-28  | 9.30E-24   |
| 46 | CD9       | 1.291361402 | 1     | 0.854 | 5.62E-28  | 1.34E-23   |
| 46 | TAX1BP3   | 1.086394413 | 0.794 | 0.363 | 5.90E-27  | 1.40E-22   |
| 46 | SPARC     | 0.868766388 | 1     | 0.6   | 2.03E-25  | 4.83E-21   |
| 46 | RGCC      | 0.972020019 | 0.706 | 0.239 | 3.50E-25  | 8.34E-21   |
| 46 | CALM2     | 0.88044374  | 1     | 0.958 | 7.42E-24  | 1.77E-19   |
| 46 | VIM       | 1.02095201  | 1     | 0.714 | 6.09E-22  | 1.45E-17   |
| 46 | FTH1      | 0.837653446 | 1     | 0.952 | 2.29E-21  | 5.44E-17   |
| 46 | TUBA1A    | 0.896038179 | 0.985 | 0.676 | 3.33E-21  | 7.93E-17   |
| 46 | FXYD1     | 0.82571262  | 0.662 | 0.248 | 3.66E-21  | 8.71E-17   |
| 46 | SMTN      | 0.821648311 | 0.588 | 0.214 | 1.08E-20  | 2.57E-16   |
| 46 | DYNLRB1   | 0.900111751 | 0.794 | 0.485 | 2.35E-18  | 5.59E-14   |
| 46 | CUEDC2    | 1.056013495 | 0.529 | 0.203 | 9.28E-18  | 2.21E-13   |
| 46 | RCAN1     | 1.098178081 | 0.368 | 0.141 | 2.10E-09  | 5.00E-05   |
| 47 | RBP4      | 2.180682672 | 0.82  | 0.009 | 0         | 0          |
| 47 | CIDEC     | 1.986512352 | 0.738 | 0.002 | 0         | 0          |
| 47 | GPD1      | 1.867394656 | 0.689 | 0.002 | 0         | 0          |
| 47 | PLIN1     | 1.856073022 | 0.721 | 0.001 | 0         | 0          |
| 47 | PLIN4     | 1.778787563 | 0.607 | 0.004 | 0         | 0          |
| 47 | THRSP     | 1.394872064 | 0.492 | 0.001 | 0         | 0          |
| 47 | ADIPOQ    | 1.326813916 | 0.475 | 0     | 0         | 0          |
| 47 | GPAM      | 1.284283997 | 0.492 | 0.011 | 5.64E-275 | 1.34E-270  |
| 47 | PPP1R1A   | 0.968262833 | 0.492 | 0.011 | 6.22E-273 | 1.48E-268  |

|    |          |             |       |       |           |             |
|----|----------|-------------|-------|-------|-----------|-------------|
| 47 | LIPE     | 1.306692129 | 0.492 | 0.014 | 9.66E-220 | 2.30E-215   |
| 47 | AQP7     | 0.893934888 | 0.361 | 0.01  | 3.64E-159 | 8.66E-155   |
| 47 | SCD      | 1.853945858 | 0.459 | 0.019 | 2.82E-141 | 6.70E-137   |
| 47 | G0S2     | 2.420391726 | 0.951 | 0.093 | 1.14E-130 | 2.72E-126   |
| 47 | S100B    | 1.230202633 | 0.492 | 0.024 | 2.36E-123 | 5.63E-119   |
| 47 | FABP4    | 2.418266898 | 1     | 0.14  | 1.64E-99  | 3.91E-95    |
| 47 | DGAT2    | 1.588544918 | 0.525 | 0.036 | 9.54E-99  | 2.27E-94    |
| 47 | LPL      | 1.233904549 | 0.459 | 0.035 | 6.58E-75  | 1.57E-70    |
| 47 | MGST1    | 2.142174432 | 0.787 | 0.135 | 3.12E-65  | 7.42E-61    |
| 47 | PLA2G16  | 1.585452772 | 0.705 | 0.121 | 1.03E-56  | 2.46E-52    |
| 47 | CD36     | 1.518678318 | 0.623 | 0.085 | 1.47E-54  | 3.50E-50    |
| 47 | ADH1B    | 1.372138654 | 0.639 | 0.121 | 4.40E-40  | 1.05E-35    |
| 47 | AKR1C2   | 1.322127489 | 0.557 | 0.111 | 1.85E-35  | 4.41E-31    |
| 47 | PNPLA2   | 1.745818544 | 0.689 | 0.204 | 5.11E-33  | 1.22E-28    |
| 47 | HSPB6    | 0.824138151 | 0.459 | 0.078 | 5.31E-32  | 1.26E-27    |
| 47 | AKR1C1   | 1.184630778 | 0.541 | 0.112 | 6.69E-32  | 1.59E-27    |
| 47 | AGPAT2   | 1.574916737 | 0.672 | 0.201 | 1.29E-31  | 3.08E-27    |
| 47 | CYB5A    | 1.311588369 | 0.934 | 0.434 | 2.18E-30  | 5.20E-26    |
| 47 | CRYAB    | 1.658248639 | 0.984 | 0.447 | 9.63E-30  | 2.29E-25    |
| 47 | ADIRF    | 1.422668262 | 1     | 0.635 | 7.03E-28  | 1.67E-23    |
| 47 | GPX4     | 1.340977573 | 1     | 0.835 | 1.01E-26  | 2.40E-22    |
| 47 | RARRES2  | 1.328945062 | 0.656 | 0.199 | 2.13E-26  | 5.07E-22    |
| 47 | FASN     | 1.268397544 | 0.361 | 0.061 | 9.52E-26  | 2.27E-21    |
| 47 | LGALS1   | 1.009280301 | 1     | 0.674 | 5.16E-21  | 1.23E-16    |
| 47 | ALDH2    | 1.044710984 | 0.885 | 0.425 | 3.13E-20  | 7.45E-16    |
| 47 | ACSL1    | 0.890952984 | 0.41  | 0.106 | 4.72E-18  | 1.12E-13    |
| 47 | SNCG     | 0.941542669 | 0.492 | 0.143 | 2.05E-17  | 4.87E-13    |
| 47 | FTL      | 0.91599389  | 1     | 0.971 | 5.02E-17  | 1.20E-12    |
| 47 | ELMOD3   | 0.817363678 | 0.279 | 0.056 | 1.34E-15  | 3.18E-11    |
| 47 | SLC25A1  | 0.766677652 | 0.393 | 0.117 | 7.56E-15  | 1.80E-10    |
| 47 | FHL1     | 1.025278319 | 0.607 | 0.266 | 1.21E-14  | 2.87E-10    |
| 47 | MT-ND4   | 0.780716374 | 1     | 0.995 | 1.72E-12  | 4.10E-08    |
| 47 | MT-ND3   | 0.982621805 | 1     | 0.993 | 3.57E-12  | 8.50E-08    |
| 47 | MGST3    | 0.811932156 | 1     | 0.756 | 1.09E-11  | 2.59E-07    |
| 47 | MT-ND2   | 0.918399556 | 1     | 0.995 | 6.88E-11  | 1.64E-06    |
| 47 | MDH1     | 1.222555986 | 0.557 | 0.336 | 1.40E-10  | 3.33E-06    |
| 47 | CAV2     | 0.831440339 | 0.557 | 0.327 | 2.78E-10  | 6.62E-06    |
| 47 | MT-CYB   | 0.761478882 | 1     | 0.995 | 2.48E-09  | 5.90E-05    |
| 47 | AKR1C3   | 0.78362187  | 0.361 | 0.148 | 3.91E-08  | 0.000930173 |
| 47 | LDHB     | 1.046826568 | 0.492 | 0.344 | 4.05E-06  | 0.09645537  |
| 47 | ASP      | 0.830479467 | 0.377 | 0.236 | 3.79E-05  | 0.900944089 |
| 48 | LOR      | 7.184271559 | 1     | 0.017 | 0         | 0           |
| 48 | FLG      | 5.70314629  | 1     | 0.016 | 0         | 0           |
| 48 | LCE1B    | 5.44717131  | 0.792 | 0.004 | 0         | 0           |
| 48 | LCE2B    | 5.336523023 | 0.917 | 0.002 | 0         | 0           |
| 48 | C1orf68  | 5.200627537 | 1     | 0.016 | 0         | 0           |
| 48 | SPRR2G   | 5.126262139 | 0.792 | 0.004 | 0         | 0           |
| 48 | CRCT1    | 5.057580629 | 1     | 0.003 | 0         | 0           |
| 48 | ASPRV1   | 5.049936943 | 1     | 0.007 | 0         | 0           |
| 48 | CST6     | 5.034479043 | 1     | 0.013 | 0         | 0           |
| 48 | FLG2     | 4.729901338 | 1     | 0.003 | 0         | 0           |
| 48 | LCE2C    | 4.719254981 | 0.792 | 0.001 | 0         | 0           |
| 48 | SPRR2E   | 4.718538008 | 1     | 0.009 | 0         | 0           |
| 48 | LCE1E    | 4.716047683 | 0.75  | 0.002 | 0         | 0           |
| 48 | LCE2D    | 4.42470632  | 0.833 | 0.001 | 0         | 0           |
| 48 | PSORS1C2 | 4.091830801 | 1     | 0.004 | 0         | 0           |
| 48 | LCE1A    | 4.066620924 | 0.708 | 0     | 0         | 0           |
| 48 | LCE2A    | 4.040805821 | 0.708 | 0.001 | 0         | 0           |
| 48 | KPRP     | 3.977919637 | 0.958 | 0.002 | 0         | 0           |
| 48 | IL37     | 3.96775823  | 0.958 | 0.001 | 0         | 0           |
| 48 | LCE5A    | 3.846790972 | 0.5   | 0.001 | 0         | 0           |
| 48 | LCE6A    | 3.635404555 | 0.917 | 0.001 | 0         | 0           |
| 48 | SPRR5    | 3.136592883 | 0.833 | 0.001 | 0         | 0           |
| 48 | CDSN     | 3.125778914 | 1     | 0.004 | 0         | 0           |

|    |            |             |       |       |           |           |
|----|------------|-------------|-------|-------|-----------|-----------|
| 48 | LCE3D      | 2.943941489 | 0.875 | 0.001 | 0         | 0         |
| 48 | NCCRP1     | 2.807406945 | 0.958 | 0.015 | 0         | 0         |
| 48 | WFDC12     | 2.690727348 | 0.792 | 0     | 0         | 0         |
| 48 | LINC00302  | 2.67109308  | 0.792 | 0     | 0         | 0         |
| 48 | AL365226.2 | 2.652709324 | 0.75  | 0.003 | 0         | 0         |
| 48 | PSAPL1     | 2.429463138 | 1     | 0.001 | 0         | 0         |
| 48 | BTC        | 2.422263327 | 0.958 | 0.008 | 0         | 0         |
| 48 | SPRR2B     | 2.334859181 | 0.542 | 0     | 0         | 0         |
| 48 | ARG1       | 2.310889166 | 0.833 | 0.001 | 0         | 0         |
| 48 | KLK5       | 3.440467738 | 1     | 0.023 | 1.01E-227 | 2.40E-223 |
| 48 | LCE1C      | 5.888259076 | 0.833 | 0.017 | 1.39E-213 | 3.30E-209 |
| 48 | FAM25A     | 4.314492311 | 1     | 0.029 | 2.62E-184 | 6.24E-180 |
| 48 | C5orf46    | 4.14798495  | 1     | 0.029 | 1.10E-182 | 2.61E-178 |
| 48 | AZGP1      | 4.010573732 | 1     | 0.03  | 2.16E-180 | 5.13E-176 |
| 48 | CYSRT1     | 2.363732767 | 0.958 | 0.028 | 8.00E-175 | 1.90E-170 |
| 48 | KRT23      | 3.373710833 | 1     | 0.032 | 2.48E-165 | 5.90E-161 |
| 48 | CTSV       | 2.521978968 | 0.917 | 0.057 | 2.67E-82  | 6.35E-78  |
| 48 | CNFN       | 2.856105506 | 0.833 | 0.049 | 2.89E-77  | 6.88E-73  |
| 48 | SPINK5     | 2.337342699 | 0.958 | 0.151 | 1.03E-36  | 2.44E-32  |
| 48 | GLRX       | 2.820294499 | 0.958 | 0.16  | 1.61E-36  | 3.83E-32  |
| 48 | CALML5     | 3.554873655 | 0.958 | 0.178 | 2.44E-31  | 5.80E-27  |
| 48 | CTNNBIP1   | 3.291630802 | 1     | 0.281 | 9.16E-27  | 2.18E-22  |
| 48 | SBSN       | 3.649505228 | 1     | 0.296 | 9.50E-26  | 2.26E-21  |
| 48 | CSTA       | 2.664230127 | 0.958 | 0.265 | 1.15E-23  | 2.73E-19  |
| 48 | BNIP3L     | 2.273515132 | 0.958 | 0.288 | 2.67E-23  | 6.36E-19  |
| 48 | KRTDAP     | 2.971909471 | 1     | 0.445 | 8.48E-20  | 2.02E-15  |
| 48 | HOPX       | 2.449168803 | 0.833 | 0.392 | 6.59E-11  | 1.57E-06  |
